1 **A single-cell transcriptomic and anatomic atlas of mouse dorsal raphe *Pet1***  
2 **neurons**

3 **Authors:** Benjamin W. Okaty\*#, Nikita Sturrock\*, Yasmin Escobedo Lozoya,  
4 YoonJeung Chang, Krissy A. Lyon, Olga V. Alekseyenko, Susan M. Dymecki#

5 Department of Genetics, Harvard Medical School, Boston, MA, USA.

6 \* These authors contributed equally

7 # Corresponding Authors

8

9 **Abstract**

10 The dorsal raphe nucleus (DR) contains the largest brain population of *Pet1*-  
11 lineage neurons, a predominantly serotonergic group distributed throughout  
12 multiple DR subdomains. These neurons collectively regulate diverse physiology  
13 and behavior and are often therapeutically targeted to treat affective disorders.  
14 Characterizing *Pet1* neuron molecular heterogeneity and relating it to anatomy is  
15 vital for understanding DR functional organization, with potential to inform  
16 therapeutic separability. Here we use high-throughput and DR subdomain-  
17 targeted single-cell transcriptomics and intersectional genetic tools to map  
18 molecular and anatomical diversity of DR-*Pet1* neurons. We describe up to  
19 fourteen neuron subtypes, many showing biased cell body distributions across  
20 the DR. We further show that *P2ry1-Pet1* DR neurons – the most molecularly  
21 distinct of the subtypes – possess unique efferent projections and  
22 electrophysiological properties. The present data complement and extend  
23 previous DR characterizations, combining intersectional genetics with multiple  
24 transcriptomic modalities to achieve fine-scale molecular and anatomic  
25 identification of *Pet1* neuron subtypes.

26

27

## 28 Introduction

29 Brainstem neurons that synthesize the monoamine neurotransmitter serotonin (5-  
30 hydroxytryptamine, 5-HT) (Baker et al., 1991a; Baker et al., 1991b; Baker et al.,  
31 1990; Dahlstroem and Fuxe, 1964; Ishimura et al., 1988; Steinbusch, 1981;  
32 Steinbusch et al., 1978) derive from embryonic precursors that express the  
33 transcription factor PET1 (alias FEV) upon terminal cell division (Hendricks et al.,  
34 1999). PET1 shapes the serotonergic identity of neurons by regulating  
35 expression of genes required for 5-HT biosynthesis, packaging in synaptic  
36 vesicles, reuptake, and metabolism (Hendricks et al., 2003; Krueger and Deneris,  
37 2008; Liu et al., 2010; Wyler et al., 2015; Wyler et al., 2016), though some *Pet1*-  
38 lineage cells in the brain have ambiguous phenotypes with respect to their ability  
39 to synthesize and release 5-HT (Alonso et al., 2013; Barrett et al., 2016; Okaty et  
40 al., 2015; Pelosi et al., 2014; Sos et al., 2017). Aside from shared expression of  
41 5-HT marker genes (to varying degrees), *Pet1*-lineage neurons display wide-  
42 ranging phenotypic heterogeneity, including diverse brainstem anatomy,  
43 hodology, and expression of neurotransmitters in addition to or other than 5-HT,  
44 suggestive of distinct *Pet1* neuron subtypes with divergent neural circuit functions  
45 (recently reviewed in (Okaty et al., 2019)). We have previously shown that the  
46 mature molecular identities of *Pet1*-lineage neurons strongly correlate with both  
47 the embryonic progenitor domain (rhombomeric domain) from which they derive  
48 and with their mature anatomy (Jensen et al., 2008; Okaty et al., 2015), largely  
49 consistent with (Alonso et al., 2013). However, even within a given *Pet1*  
50 rhombomeric sublineage and anatomical subdomain, *Pet1* neurons may display  
51 different molecular and cellular phenotypes (Niederkofler et al., 2016; Okaty et  
52 al., 2015). *Pet1* neurons project widely throughout the brain and are functionally  
53 implicated in numerous life-sustaining biological processes and human  
54 pathologies. Thus, assembling a taxonomy of *Pet1* neuron subtypes based on  
55 molecular and cellular properties and linking identified *Pet1* neuron subtypes to  
56 specific biological functions is important for basic neuroscience and human  
57 health, including the development of targeted therapeutics. Here we provide a

58 high-resolution, single-cell transcriptomic atlas of dorsal raphe *Pet1*-lineage  
59 neurons revealing hierarchically and spatially organized molecular subtypes,  
60 each expressing unique repertoires of neurotransmitters, plasma membrane  
61 receptors, ion channels, cell adhesion molecules, and other gene categories  
62 important for specifying neuronal functions.

63 The dorsal raphe (DR) nucleus comprises the largest anatomically defined  
64 subgroup of *Pet1* expressing cells in the brain, and these cells are derived from  
65 embryonic progenitors in the isthmus and rhombomere 1 (Alonso et al., 2013;  
66 Jensen et al., 2008). Multiple studies have demonstrated neuronal diversity  
67 within the DR, in *Pet1*-expressing 5-HT neurons as well as other resident cell  
68 populations (Calizo et al., 2011; Challis et al., 2013; Crawford et al., 2010;  
69 Fernandez et al., 2016; Huang et al., 2019; Kirby et al., 2003; Niederkofler et al.,  
70 2016; Prouty et al., 2017; Ren et al., 2018; Ren et al., 2019; Spaethling et al.,  
71 2014; Vasudeva and Waterhouse, 2014; Zeisel et al., 2018). In the present  
72 study, we extend these findings by transcriptionally profiling *Pet1*-lineage marked  
73 DR neurons using microfluidic cell sorting and droplet-based single-cell RNA  
74 sequencing (scRNA-seq). Our particular experimental approach combining  
75 intersectional mouse genetics, high-throughput cell-type-specific purification  
76 (using the On-Chip Biotechnologies microfluidic sorter), and newly improved  
77 scRNA-seq library construction chemistry (using the 10X Genomics Chromium  
78 Single Cell 3' v3 kit) allowed us to surpass prior resolution of DR *Pet1* neuron  
79 molecular diversity, both in terms of the number of DR *Pet1* cells profiled and the  
80 number of transcriptomically distinct *Pet1* neuron subtypes identified. To further  
81 characterize the anatomical organization of these molecularly defined *Pet1*  
82 neuron subtypes, we used intersectional mouse transgenic tools, crossing  
83 *Pet1::Flpe* mice with various subtype-relevant Cre-driver mice and dual Flpe- and  
84 Cre-responsive fluorescent reporter lines. In addition to performing histological  
85 analyses of these intersectionally defined *Pet1*-lineage neuron subpopulations,  
86 we further characterized them using manual cell-sorting from microdissected  
87 sub-domains of the DR followed by scRNA-seq. Comparing this data with our

88 high-throughput droplet-based scRNA-seq approach allowed us to map *Pet1*  
89 neuron molecular diversity onto DR anatomy. We found that DR *Pet1*-lineage  
90 neurons comprise as many as fourteen distinct molecularly defined subtypes,  
91 several of which we show are anatomically biased within rostral-caudal, dorsal-  
92 ventral, and medial-lateral axes. Additionally, by combining intersectional  
93 genetics with projection mapping and *ex vivo* slice electrophysiology we show  
94 examples of distinct *Pet1* neuron molecular subtypes that also differ in other  
95 cellular phenotypes important for function, such as hodology and  
96 electrophysiology.

## 97 **Results**

### 98 **Droplet-based scRNA-seq of *Pet1* fate-mapped DR neurons reveals new** 99 **molecularly defined neuron subtypes**

100 To characterize the molecular diversity of *Pet1*-lineage DR neurons in a targeted,  
101 high-throughput, high-resolution manner we partnered recombinase-based  
102 genetic fate mapping, microfluidic fluorescence-based cell sorting, and droplet-  
103 based single-cell barcoding followed by RNA-seq library preparation and next-  
104 generation sequencing using the 10X Genomics Chromium Single Cell 3' v3 kit  
105 (**Figure 1A; Methods**). Fluorescent labeling of *Pet1*-lineage DR neurons was  
106 achieved in mice of the following genotypes: (1) *Pet1::Flpe* (Jensen et al., 2008);  
107 *En1::cre* (Kimmel et al., 2000); *RC::FrePe* (the latter transgene a dual Flpe- and  
108 Cre-dependent fluorescent reporter inserted into the *ROSA26* (*R26*) locus (Brust  
109 et al., 2014; Dymecki et al., 2010; Okaty et al., 2015)), in which *Pet1*-lineage  
110 neurons derived from the *En1*<sup>+</sup> isthmus and rhombomere 1 (r1) embryonic  
111 progenitor domains, are marked by eGFP expression or (2) *Pet1::Flpe; RC::FL-*  
112 *hM3Dq* (Sciolino et al., 2016), in which all *Pet1* neurons are eGFP-labeled (Cre  
113 was not utilized in these experiments, thus only eGFP, not hM3Dq, was  
114 expressed).

115 Brains were acutely dissected from 6-10 week old mice of both genotypes (4  
116 males and 6 females), and DR cells were dissociated as previously described  
117 (Okaty et al., 2015) (also see **Methods**). eGFP-expressing neurons were  
118 selectively purified using the On-Chip Biotechnologies microfluidic cell sorter, a  
119 recently developed technology that greatly reduces the pressure forces typically  
120 exerted on cells in conventional flow sorters, thereby achieving higher levels of  
121 cell viability (Watanabe et al., 2014). Indeed, examination of sorted neurons  
122 revealed that many still had intact processes emanating from their somas. Cells  
123 were then run through the 10X Genomics Chromium Single Cell 3' v3 protocol,  
124 followed by Illumina NextSeq 500 sequencing. The Cell Ranger pipeline was  
125 used for transcript mapping and single-cell de-multiplexing, and all analyses of  
126 transcript counts were performed using the R package Seurat (Butler et al., 2018;  
127 Stuart et al., 2019) (also see **Methods**). After stringently filtering out “suspect”  
128 single-cell libraries (e.g. libraries with high levels of non-neuronal or  
129 mitochondrial genes, outlier library complexity, or absence/low levels of *Pet1*  
130 transcripts), we obtained 2,350 single cells for further analysis, with a mean of  
131 7,521 genes detected per single cell library (mean of 57,678 UMIs per cell), and  
132 a total of 17,231 genes detected in aggregate (after filtering out genes that were  
133 expressed in fewer than ten cells).

134 As the principal goal of our scRNA-seq experiments was to characterize  
135 molecular diversity of *Pet1*-lineage neurons, our analyses were aimed at  
136 identifying genes with significantly variable transcript expression across single  
137 neurons, and using these gene expression differences to classify *Pet1*-lineage  
138 neuron subtypes. Typical clustering approaches used to classify cell types (or  
139 cell states) based on scRNA-seq data are largely unsupervised, but do require  
140 supervised input regarding a number of parameters that have the potential to  
141 significantly alter the resulting cluster assignments. These parameters include  
142 the data reduction used prior to clustering (such as principal components  
143 analysis), the number of components included in the reduction, and a resolution  
144 or granularity parameter that determines the “community” size of clusters (i.e.

145 whether cluster boundaries are more or less inclusive; coarse-grained or fine-  
146 grained). Rather than arbitrarily choosing a set of parameters for our *Pet1*-  
147 lineage neuron subtype classification, we chose a more exploratory approach by  
148 systematically varying key parameters and examining how sensitive the resulting  
149 clusters were to these combinations of parameters.

150 First, single-cell transcript counts were log-normalized, and we carried out  
151 principal components analysis (PCA) on the scaled and centered expression  
152 values of the top two thousand genes with the highest variance (after applying a  
153 variance-stabilizing transform, see **Methods**) in order to reduce the  
154 dimensionality of the data onto a smaller set of composite variables that  
155 represent the most salient gene expression differences. Plotting the variance  
156 explained by each principal component we observed an inflection point, or  
157 “elbow”, around the fiftieth component suggesting a drop-off in the information  
158 content of subsequent components (**Figure 1–figure supplement 1A**), and  
159 found that roughly forty percent of the total variance was explained by these first  
160 fifty components. Further examination of the gene loadings of each component  
161 revealed that components six and seven were heavily weighted towards sex-  
162 specific transcripts and transcripts that largely correlated with batch. As our  
163 experiments were not designed to explicitly compare sex as a variable, and given  
164 the difficulties of interpreting batch-correlated gene expression differences (e.g.  
165 these could stem from population sampling biases of the different cell sorts,  
166 different genotypes used, different balance of sexes, or any number of  
167 idiosyncratic biological and technical differences) we ultimately chose to remove  
168 components six and seven from downstream analyses (though we found that  
169 their inclusion had only modest effects on data clustering).

170 Next, we varied: (1) the number of PCs included in the data reduction (from one  
171 to fifty, excluding PCs six and seven) used as input to the Seurat FindNeighbors  
172 function, and (2) the resolution parameter in the Seurat FindClusters function  
173 (from 0.1 to 2.0, in intervals of 0.1, using the Louvain algorithm). The results of  
174 this analysis are summarized in the contour plot in **Figure 1–figure supplement**

175 **1B.** Including only the first few principal components led to highly variable  
176 numbers of clusters depending on the resolution parameter (resulting in as many  
177 as 40 clusters at the highest resolution). However, for all resolutions the number  
178 of clusters mostly stabilized after including the first thirty PCs. In this regime of  
179 parameter space the number of clusters was, for the most part, bounded  
180 between five and twenty depending on the resolution. As a first pass at homing in  
181 on the “optimum” number of clusters (strictly in a heuristic sense), we calculated  
182 the frequency of obtaining a given number of clusters over all combinations of  
183 parameters, reasoning that cluster numbers that are less sensitive to precise  
184 tuning of parameters would appear more frequently, and the “robustness” of  
185 these cluster numbers might more faithfully reflect biologically meaningful  
186 subgroup structure in the data. The cluster number frequency plot in **Figure 1–**  
187 **figure supplement 1C** shows that there are four local maxima and one global  
188 maximum corresponding to five, eight, eleven, fourteen, and seventeen clusters  
189 respectively. Given the high frequency of these cluster numbers, we chose to  
190 examine their composition more carefully. As multiple combinations of  
191 parameters lead to the same number of clusters (**Figure 1–figure supplement**  
192 **1D**), in some cases leading to differences in cluster composition (generally  
193 subtle), we decided to err on the side of including more data and thus fixed the  
194 number of PCs at one to fifty, excluding PCs six and seven, and varied the  
195 resolution to obtain five, eight, eleven, fourteen, and seventeen clusters.

196 We characterized cluster structure through hierarchical dendrograms, uniform  
197 manifold approximation and projection for dimension reduction (UMAP) (a  
198 technique recently developed by McInnes, Healy, and Melville as described in a  
199 manuscript available at arXiv.org, and implemented in Seurat), and differential  
200 expression analysis using Wilcoxon rank-sum tests to identify transcripts that are  
201 significantly enriched or depleted among clusters (**Figure 1–figure supplement**  
202 **2A-I, Figure 1 B-D**). We ultimately judged seventeen clusters (resolution = 1.5)  
203 to be excessive, due to the inclusion of clusters with very few enriched genes as  
204 well as clusters that appeared somewhat intermixed in UMAP space (analysis

205 not shown). We thus focused our analyses on lower resolution clusters. Across  
206 all resolutions analyzed (0.1, 0.3, 0.7, and 0.9), we found a common set of genes  
207 that was useful in characterizing cluster structure, namely *Tph2*, *Gad2*, *Gad1*,  
208 *Slc17a8* (alias *Vglut3*), and *Met*. The *Tph2* gene encodes for tryptophan  
209 hydroxylase 2, the rate-limiting enzyme involved in 5-HT biosynthesis in the  
210 central nervous system (Walther and Bader, 2003; Walther et al., 2003), and all  
211 but one cluster showed consistently high *Tph2* transcript expression. In the five-  
212 and eight-cluster-number analyses (resolution = 0.1 and 0.3, respectively), one  
213 cluster displayed a strikingly bi-modal distribution of *Tph2* transcript expression  
214 (**Figure 1–figure supplement 2A,D**, clusters four and six, respectively), however  
215 increasing the resolution further divided this group into a *Tph2*-low and a *Tph2*-  
216 “variable” group, displaying a broader distribution of single-cell expression than  
217 other clusters (**Figure 1–figure supplement 2G** and **Figure 1B**, clusters ten and  
218 fourteen, respectively, corresponding to resolutions of 0.7 and 0.9). Beyond *Tph2*  
219 expression, these two subgroups displayed similarly shaped distributions (lower  
220 mean expression and higher variability) for several 5-HT neuron marker genes  
221 (**Figure 1–figure supplement 3**). *Gad1* and *Gad2* are paralogous genes that  
222 encode two distinct forms of the gamma-aminobutyric acid (GABA) synthetic  
223 enzyme glutamate decarboxylase (Erlander et al., 1991), and we found a sizable  
224 cluster of *Pet1* neurons (~50%) that express high levels of *Tph2* and *Gad2*, and  
225 to a lesser extent *Gad1* (generally detected in fewer cells than *Gad2*), which  
226 could be further subdivided into five sub-clusters at finer resolution (**Figure 1B**,  
227 **C**, clusters two-six). One of these clusters, cluster six (**Figure 1B,C**), contained  
228 *Pet1* neurons additionally expressing intermediate levels of transcripts for *Vglut3*,  
229 encoding the vesicular glutamate transporter 3 (Fremeau et al., 2002; Gras et al.,  
230 2002). Notably, this group of neurons also had the highest expression of *Gad1*  
231 relative to other groups. High expression levels of *Vglut3* transcripts were  
232 detected in eight clusters (**Figure 1B, C**, clusters seven to fourteen), comprising  
233 ~46% of profiled *Pet1* neurons, including the *Tph2*-low and *Tph2*-variable  
234 clusters (**Figure 1B, C**, clusters 13 and 14). Cluster twelve, the most striking  
235 outlier group of *Pet1* neurons, is characterized by high transcript expression of



236 *Tph2*, *Vglut3*, and *Met*, the latter encoding the MET proto-oncogene (also known  
237 as hepatocyte growth factor receptor) (Iyer et al., 1990). The remaining 4% of  
238 *Pet1* neurons, comprising cluster one, expressed high levels of *Tph2* transcripts  
239 but only sporadically expressed transcripts for *Gad2*, *Gad1*, or *Vglut3* (**Figure**  
240 **1B,C**).

241 Examination of the dendrogram in **Figure 1B** and the UMAP plot in **Figure 1C**  
242 (as well as examining the successively parcelled UMAP clusters in **Figure 1–**  
243 **figure supplement 2B, E, and H** with increasing resolution) gives a sense of  
244 “relatedness” among clusters. For example, *Gad1/2-Tph2* clusters two to four are  
245 more similar to each other than to *Vglut3-Tph2* clusters, while cluster six, the  
246 *Gad1/2-Vglut3-Tph2* cluster, and cluster five are situated between the other  
247 *Gad1/2-Tph2* and *Vglut3-Tph2* groups. Like cluster twelve, clusters thirteen and  
248 fourteen appear as outliers from the other clusters in the dendrogram (**Figure**  
249 **1B**), but despite showing low and variable expression of the 5-HT neuron marker  
250 gene *Tph2*, respectively, they nonetheless cluster more closely to other *Pet1*  
251 neurons than do *Met-Vglut3-Tph2-Pet1* neurons (cluster twelve) in the UMAP  
252 plot (**Figure 1C**).

253 *Met*-expressing *Pet1* neurons have been previously reported in mice, both at the  
254 transcript and protein levels, specifically in the caudal DR and the median raphe  
255 (MR) (Kast et al., 2017; Okaty et al., 2015; Wu and Levitt, 2013) and more  
256 recently (Huang et al., 2019; Ren et al., 2019). Likewise, *Vglut3*- and *Gad1/2*-  
257 expressing DR *Pet1* neurons have been previously reported in mice and rats, as  
258 demonstrated by mRNA *in situ*, immunocytochemistry, and RNA-seq (Amilhon et  
259 al., 2010; Commons, 2009; Fu et al., 2010; Gagnon and Parent, 2014; Gras et  
260 al., 2002; Herzog et al., 2004; Hioki et al., 2004; Hioki et al., 2010; Huang et al.,  
261 2019; Okaty et al., 2015; Ren et al., 2018; Ren et al., 2019; Rood et al., 2014;  
262 Shikanai et al., 2012; Spaethling et al., 2014; Voisin et al., 2016). Consistent with  
263 functional expression of VGLUT3, which allows for filling of synaptic vesicles with  
264 the excitatory neurotransmitter glutamate, depolarization-induced glutamate  
265 release by DR *Pet1/5-HT* neurons has been demonstrated by a number of

266 groups (Johnson, 1994; Kapoor et al., 2016; Liu et al., 2014; Sengupta et al.,  
267 2017; Wang et al., 2019). Additionally, VGLUT3 is thought to interact with  
268 vesicular monoamine transporter two (encoded by *Slc18a2*, alias *Vmat2*  
269 (Erickson et al., 1992)) to enhance the loading of 5-HT into synaptic vesicles by  
270 increasing the pH gradient across vesicular membranes, a process referred to as  
271 “vesicle-filling synergy” (Amilhon et al., 2010; El Mestikawy et al., 2011; Munster-  
272 Wandowski et al., 2016). GABA-release by *Pet1* DR neurons, on the other hand,  
273 has not been reported, thus the functional consequences of *Gad1* and *Gad2*  
274 transcript expression are presently unknown.

## 275 **Differentially expressed genes span functional categories relevant to** 276 **neuronal identity**

277 Scaled expression of the top five marker genes for each cluster (ranked by p-  
278 value or in some cases fold enrichment) are represented in the heatmaps in  
279 **Figure 1–figure supplement 2C, F, I, and Figure 1D**, depending on the cluster  
280 resolution. To aid interpretation of the functional significance of differentially  
281 expressed genes, expression patterns of a subset of significantly variable genes  
282 and cluster markers (for the fourteen clusters resulting from a cluster resolution  
283 of 0.9) are represented in the dot plots in **Figure 2**, organized by categories of  
284 biological function (identified by Gene Ontology annotations and literature  
285 searches). These gene categories were selected based on general importance  
286 for shaping neuronal functional identity – e.g. genes that encode transcription  
287 factors which broadly regulate molecular phenotypes, as well as genes that  
288 encode ion channels, plasma membrane receptors, calcium-binding proteins,  
289 kinases, and cell adhesion and axon guidance molecules, which collectively  
290 govern neuronal electrophysiology, signal transduction, and synaptic  
291 connectivity.

## 292 *Transcription Factors*

293 History of expression of *Pet1/Fev*, encoding the FEV transcription factor, ETS  
294 family member (Fyodorov et al., 1998; Hendricks et al., 1999) defines the *Pet1*  
295 neuronal lineage. As can be observed from the transcription factor dot plot in  
296 **Figure 2** (as well as the violin plot in **Figure 1–figure supplement 3**), *Pet1/Fev*  
297 displays broad expression across clusters but is expressed at significantly lower  
298 levels in cluster thirteen *Pet1* neurons. Several genes known to be directly  
299 regulated by *Pet1* (Hendricks et al., 2003; Liu et al., 2010; Wyler et al., 2015;  
300 Wyler et al., 2016), such as *Tph2*, *Slc6a4/Sert* (encoding the serotonin  
301 transporter (Hoffman et al., 1991; Lesch et al., 1993)), and *Slc18a2/Vmat2*  
302 likewise show reduced expression in cluster thirteen. The transcription factor  
303 engrailed 1 (*En1*) (Joyner et al., 1985), in its expression overlap with *Pet1*, is a  
304 marker of having derived from progenitors in the isthmus and r1 (Alonso et al.,  
305 2013; Jensen et al., 2008; Okaty et al., 2015), and, as expected, *En1* transcripts  
306 are detected broadly across all DR clusters. The paralogous gene engrailed 2  
307 (*En2*) (Joyner and Martin, 1987), shows a more variable expression profile  
308 across *Pet1* DR neurons, being largely absent in cluster eight and twelve, and  
309 significantly lower in cluster seven. *En1* and *En2* are required for normal  
310 development of DR *Pet1* neuron cytoarchitecture and for perinatal maintenance  
311 of serotonergic identity (Fox and Deneris, 2012). *Nr3c1*, encoding the nuclear  
312 receptor subfamily 3, group C, member 1, aka the glucocorticoid receptor, which  
313 binds the stress hormone corticosterone (cortisol in humans), is expressed  
314 broadly across clusters one through eleven, but is de-enriched in cluster twelve,  
315 and to a lesser extent clusters thirteen and fourteen, suggesting differential  
316 sensitivity to corticosterone across different *Pet1* neuron molecular subtypes.  
317 Numerous studies have highlighted the functional importance of DR  
318 glucocorticoid signaling for 5-HT neuron activity and behavioral modulation  
319 (Bellido et al., 2004; Evrard et al., 2006; Judge et al., 2004; Laaris et al., 1995;  
320 Vincent et al., 2018; Vincent and Jacobson, 2014).

321 Other transcription factor encoding genes show more striking expression  
322 specificity. Transcripts for neuronal pas domain 1 and 3 (encoded by *Npas1* and

323 *Npas3*) and POU class 3 homeobox 1 (*Pou3f1*) are significantly enriched in  
324 cluster one *Pet1* neurons. From mouse genetic studies, both NPAS1 and NPAS3  
325 are associated with regulation of genes and behavioral endophenotypes  
326 implicated in psychiatric disorders, such as schizophrenia, though NPAS1/3 are  
327 also expressed by other cell types in the brain, such as cortical interneurons,  
328 which may contribute to observed behavioral effects of *Npas1/3* loss of function  
329 (Erbel-Sieler et al., 2004; Michaelson et al., 2017; Stanco et al., 2014).

330 *Pax5*, encoding paired box 5 (Asano and Gruss, 1992), a transcription factor  
331 involved in the regulation of isthmus organizer activity during development  
332 (Funahashi et al., 1999; Ye et al., 2001) is significantly enriched in clusters two,  
333 four, and five, and highly expressed in clusters three and six as well. *Pou6f2*  
334 (POU class 6 homeobox 2) and *Klf5* (Kruppel like factor 5) show a similar pattern  
335 of expression. *Sox14* (SRY-box transcription factor 14) and *Satb2* (SATB  
336 homeobox 2) show an even more restricted expression profile, limited to clusters  
337 two through four. Notably, clusters two through six are also enriched for  
338 expression of *Gad2*, which, like *Sox14*, is most highly expressed in cluster four.  
339 *Sox14* expression has been shown to regulate GABAergic cell identity in the  
340 dorsal midbrain (Makrides et al., 2018), and *Pax5* expression has been  
341 implicated in GABAergic neurotransmitter specification in the dorsal horn of the  
342 spinal cord (Pillai et al., 2007), suggesting that these genes may play similar  
343 roles in DR *Pet1* neurons. Interestingly, *Nr2f2* (encoding nuclear receptor  
344 subfamily 2, group F, member 2, alias COUP-TFII) shows an expression profile  
345 that is complementary to *En2* and *Pax5*, enriched in cluster eight, nine, and  
346 twelve, all of which are enriched for *Vglut3* transcripts, and are largely devoid of  
347 *Gad1/2* expression.

348 Overall, each of the fourteen transcriptome-defined clusters of DR *Pet1* neurons  
349 can largely be classified by the combinatorial expression of two to three  
350 transcription factors. For example, *Pou3f2* (POU class three homeobox 2),  
351 *Bcl11a* (B cell CLL/lymphoma 11A zinc finger protein), and *Id2* (inhibitor of DNA  
352 binding 2) show enriched expression in cluster six, and to a lesser extent cluster

353 thirteen. Other notable transcription factor markers of *Pet1* neuron subgroups  
354 include *Foxp1* (forkhead box P1), enriched in clusters seven and fourteen, *Rorb*  
355 (RAR-related orphan receptor beta), enriched in cluster eight, *Maf* (avian  
356 musculoaponeurotic fibrosarcoma oncogene homolog), enriched in cluster nine,  
357 *Foxa1* (forkhead box A1), enriched in cluster eleven, *Zeb2* (zinc finger E-box  
358 binding homeobox 2) enriched in cluster twelve, *Zfp536* (zinc finger protein 536),  
359 *Nfix* (nuclear factor I/X), and *Nfib* (nuclear factor I/B), enriched in cluster thirteen  
360 (detected in cluster six as well), and *Ldb2* (LIM domain binding 2), enriched in  
361 clusters thirteen and fourteen.

### 362 *Neurotransmitters and Neuropeptides*

363 *Pet1* neuron subtypes defined by transcriptomic clustering also show differential  
364 expression of a number of neurotransmitter-related and neuropeptide-encoding  
365 genes (**Figure 2** Neurotransmitters and Neuropeptides dot plot). Transcript  
366 profiles related to classic neurotransmitter production, including *Tph2*, *Gad2*,  
367 *Gad1*, and *Slc17a8*, have already been described above (see also **Figure 1B**).  
368 Transcript expression of *Trh*, encoding thyrotropin-releasing hormone, is  
369 significantly enriched in cluster two *Pet1* neurons and detected in clusters four  
370 and six (**Figure 1D** and **Figure2**). Another gene involved in thyroid hormone  
371 signaling, *Crym*, encoding crystalline mu, also known as NADP-regulated thyroid-  
372 hormone-binding protein shows a similar expression profile (**Figure 1D**). *Pdyn*,  
373 encoding the prohormone prodynorphin is enriched in clusters five, six, and  
374 fourteen. Prodynorphin is the precursor protein to the opioid polypeptide  
375 dynorphin, which predominately binds the kappa-opioid receptor to produce a  
376 variety of effects, such as analgesia and dysphoria (Bruchas et al., 2010;  
377 Chavkin et al., 1982; Land et al., 2008; Land et al., 2009). Expression of *Nos1*,  
378 encoding nitric oxide synthase 1, is significantly enriched in cluster five, nine, and  
379 eleven. The anatomical distribution of nitric oxide expressing DR 5-HT neurons in  
380 rodents has been characterized previously as being predominately midline in the  
381 DR (Fu et al., 2010; Prouty et al., 2017; Vasudeva et al., 2011; Vasudeva and  
382 Waterhouse, 2014). Cluster nine also shows enriched expression of *Crh*,

383 encoding corticotropin-releasing hormone. Several other neuropeptide encoding  
384 genes show sporadic, significantly variable expression among different clusters,  
385 including growth hormone-releasing hormone (*Ghrh*), neuromedin B (*Nmb*),  
386 neuropeptide B (*Npb*), proenkephalin (*Penk*), and somatostatin (*Sst*).

### 387 *Ionotropic and G-Protein Coupled Receptors*

388 Cluster one and cluster thirteen *Pet1* neurons show the most prominent  
389 specificity with respect to ionotropic receptor markers (**Figure 2 Ionotropic**  
390 **Receptors**), though in general we found relatively few *Pet1* neuron subtype-  
391 specific ionotropic gene markers relative to other categories of gene function.  
392 *Gabrq* and *Gabre*, encoding GABA type A receptor subunits theta and epsilon,  
393 respectively, are significantly enriched in cluster one, as well as *Gria1*, encoding  
394 glutamate ionotropic receptor AMPA type subunit 1. GABA type A receptor  
395 subunit gamma3 (*Gabrg3*) and glutamate ionotropic receptor NMDA type subunit  
396 2A (*Grin2a*) transcripts are largely de-enriched in clusters two through four and  
397 twelve, are significantly enriched in cluster nine, and variably expressed in other  
398 clusters. GABA A receptor subunit alpha 2 (*Gabra2*) is expressed in all clusters  
399 but is significantly enriched in cluster twelve, and GABA A receptor subunit alpha  
400 1 (*Gabra1*) and glutamate ionotropic receptor AMPA type subunit 3 (*Gria3*)  
401 transcripts both show significant enrichment in cluster thirteen.

402 Transcripts encoding G protein-coupled receptors (GPCRs) show patterns of  
403 enrichment largely across blocks of clusters (e.g. *Vglut3*-expressing versus non-  
404 *Vglut3*-expressing *Tph2-Pet1* neurons), or highly specific enrichment in either  
405 cluster twelve or clusters thirteen and fourteen (**Figure 2 G Protein-coupled**  
406 **Receptors**). For example, cluster twelve neurons show strong enrichment for  
407 opioid receptor mu (*Oprm1*), purine receptor y1 (*P2ry1*), relaxin receptor (*Rxfp1*),  
408 sphingosine-1-phosphate receptor 3 (*S1pr3*), and tachykinin receptor 3 (*Tacr3*)  
409 transcripts. Moreover, they lack expression of transcripts for many GPCRs  
410 expressed by the majority of other *Pet1* neurons, such as presynaptic 5-HT  
411 autoreceptors, encoded by *Htr1b* and *Htr1d*, as well as orexin and histamine

412 receptors (e.g. *Hcrtr1*, *Hcrtr2*, *Hrh1*, *Hrh3*), whose protein products are involved  
413 in the regulation of arousal. We found that histamine receptor 1 (*Hrh1*) and  
414 hypocretin (alias orexin) receptor 1 (*Hcrtr1*) transcripts were the most abundant  
415 in clusters one through four, and histamine receptor 3 (*Hrh3*) transcripts were the  
416 most abundant in clusters two through six. Hypocretin receptor 2 (*Hcrtr2*)  
417 transcripts showed a somewhat complementary expression pattern, with the  
418 highest levels in clusters seven through eleven, as well as cluster three. Other  
419 GPCR transcripts with notable expression patterns are neuropeptide Y receptor  
420 Y2 (*Npy2r*), enriched in clusters seven and ten, cannabinoid receptor 1 (*Cnr1*)  
421 and 5-HT receptor 2C (*Htr2c*), enriched in clusters thirteen and fourteen, and  
422 *Gpr101*, an “orphan” GPCR thought to play a role in the growth hormone  
423 releasing-growth hormone signaling axis (GHRH-GH axis) (Trivellin et al., 2016;  
424 Trivellin et al., 2018), enriched in cluster fourteen.

425 *Regulators of Neuron Projections, Synaptic Connectivity, and Heparan Sulfate*  
426 *Proteoglycans*

427 Similar to transcription factor expression patterns, most DR *Pet1* neuron  
428 subgroups can be classified by combinatorial enrichment of transcripts for genes  
429 encoding regulators of neuron projections and synaptic connectivity (**Figure 2**  
430 **Regulators of Neuron Projections and Synaptic Connectivity**). Differential  
431 expression of these genes likely contributes to differential innervation patterns of  
432 distinct DR *Pet1* neuron subgroups, such as reported by various studies  
433 (Fernandez et al., 2016; Huang et al., 2019; Kast et al., 2017; Muzerelle et al.,  
434 2016; Niederkofler et al., 2016; Ren et al., 2018; Ren et al., 2019; Teng et al.,  
435 2017), and yet to be uncovered. Genes encoding regulators of heparan sulfate  
436 proteoglycans may also play a role in projection specificity and synaptic  
437 organization (Condomitti and de Wit, 2018; Di Donato et al., 2018; Lazaro-Pena  
438 et al., 2018; Minge et al., 2017; Zhang et al., 2018), and likewise show patterns  
439 of enrichment across different *Pet1* neuron clusters (**Figure 2 Regulators of**  
440 **Heparan Sulfate Proteoglycans**). For example, transcript expression of  
441 heparan sulfate-glucosamine 3-sulfotransferase 4 (*Hs3st4*) is enriched across

442 clusters one through four, heparan sulfate-glucosamine 3-sulfotransferase 5  
443 (*Hs3st5*) expression is significantly enriched in cluster ten (and expressed at high  
444 levels in clusters one, eight, nine, and eleven), and sulfatase 2 (*Sulf2*) and  
445 heparan sulfate-glucosamine 3-sulfotransferase 2 (*Hs3st2*) transcripts are  
446 enriched in cluster thirteen.

447 **Intersectional genetic labeling of *Pet1* neuron subgroups in combination**  
448 **with histology and manual scRNA-seq reveals spatial distributions of DR**  
449 ***Pet1* neuron subtypes**

450 Having identified transcriptomically distinct DR *Pet1* neuron subtypes in a largely  
451 unsupervised manner, we next sought to determine whether the cell bodies of  
452 these molecularly defined *Pet1* neuron subtypes show differential distributions  
453 within anatomical subfields of the DR. Using intersectional genetics to  
454 fluorescently label *Pet1* neuron subgroups defined by pairwise expression of  
455 *Pet1* and one of an assortment of identified subtype marker genes, we iteratively  
456 mapped molecular subtypes to anatomy in two ways – (1) using histology and  
457 microscopy to directly characterize cell body locations in fixed brain sections  
458 (**Figure 3**), and (2) performing manual scRNA-seq on labeled cells dissociated  
459 and hand sorted from microdissected anatomical subdomains of the DR, and  
460 comparing these expression profiles to our above described high-throughput  
461 scRNA-seq data (which we will refer to as our 10X scRNA-seq data) (**Figure 4**).  
462 We iteratively bred triple transgenic mice harboring (1) our *Pet1::Flpe* transgene,  
463 (2) one of two dual Flpe- and Cre- responsive reporter constructs (*RC::FrePe* or  
464 *RC::FL-hM3Dq*), and (3) one of five Cre-encoding transgenes (*Sert::cre*,  
465 *Vglut3::IRES-cre*, *Npy2r::IRES-cre*, *Crh::cre*, or *P2ry1::IRES-cre*), where *cre*  
466 expression is driven by either the endogenous promoter of the marker gene or by  
467 a gene-specific bacterial artificial chromosome (BAC). In selecting candidate  
468 markers from our list of differentially expressed genes, we sought gene drivers  
469 that could potentially divide *Pet1* neurons into subgroups at varying resolutions  
470 and were available as *cre* lines. Representative images for each triple transgenic  
471 genotype are given in **Figure 3** (organized by marker genes, columns A-E, at



472 different rostrocaudal levels of the DR, rows 1-6). For each genotype, the  
473 intersectionally defined subpopulation of neurons is labeled in green (i.e. history  
474 of Flpe and Cre expression) whereas the “subtractive” subpopulation is labeled in  
475 red (i.e. history of Flpe but not Cre expression).

#### 476 *Histology of Pet1-Intersectionally Defined Neuron Populations*

477 High *Sert* expression, like high *Tph2* expression, defines *Pet1* neuron clusters  
478 one through eleven. Cluster twelve shows consistently lower mean expression of  
479 *Sert* transcripts (and to a lesser extent *Tph2* transcripts) than clusters one  
480 through eleven (**Figure 3A**), cluster fourteen shows a broader distribution of *Sert*  
481 transcript levels (**Figure 3A**) and most 5-HT markers (**Figure 1–figure**  
482 **supplement 3**), and cluster thirteen shows very low levels of *Sert* transcripts  
483 (**Figure 3A**) and other 5-HT markers (**Figure 1–figure supplement 3**).

484 Consistent with the majority of profiled *Pet1* neurons expressing high levels of  
485 *Sert* and *Pet1* transcripts, we detected intersectional *Sert::cre;Pet1::Flpe*  
486 fluorescently marked neurons throughout the full rostrocaudal and dorsoventral  
487 extent of the DR (**Figure 3A1-A6**), however the subtractive population  
488 (presumably cluster thirteen and perhaps some cluster twelve and fourteen *Pet1*  
489 neurons) showed a more limited distribution. These subtractive (Flpe+ but Cre-)  
490 neurons were most conspicuously concentrated in the rostromedial DR (**Figure**  
491 **3A2**), where only a few *Sert::cre;Pet1::Flpe* intersectional (Flpe+ and Cre+)  
492 neurons were intermingled. More caudally, the Flpe-only, subtractive neurons  
493 remained largely midline, but became more intermixed with the double-positive  
494 *Sert::cre;Pet1::Flpe* intersectionally marked cells. As another way of anatomically  
495 characterizing putative cluster thirteen *Pet1* neurons, we immunostained for  
496 TPH2 in *En1::cre;Pet1::Flpe;RC::FrePe* mice (the same genotype as used in  
497 some of our 10X scRNA-seq experiments), and found that the distribution of  
498 TPH2 immuno-negative *Pet1* neuron cell bodies showed a very similar  
499 distribution to the subtractive neurons (Flpe-only) in  
500 *Sert::cre;Pet1::Flpe;RC::FrePe* mice. (**Figure 3–figure supplement 1A-B**),  
501 further confirming the existence of *Pet1*-expressing neurons that do not express

502 TPH2 protein (Barrett et al., 2016; Pelosi et al., 2014). We consistently observed  
503 that these *Pet1::Flpe*-captured, TPH2-immunonegative neurons often have  
504 smaller cell soma and bipolar morphology (**Figure 3–figure supplement 1B**).

505 *Vglut3-Pet1* expression defines *Pet1* neuron clusters seven through fourteen,  
506 and to a lesser extent cluster six (**Figure 3B**). We observed that  
507 *Vglut3::cre;Pet1::Flpe* intersectionally marked neurons show a strong  
508 ventromedial bias in rostral portions of the DR (**Figure 3B1-B3**), and are the  
509 predominant *Pet1* neuron subgroup in the more caudal midline DR (**Figure 3B3-**  
510 **B6**). By contrast, the subtractive *Pet1* neuron subgroup (presumably comprising  
511 *Pet1* neurons from clusters one through five and partly six) show a strong dorsal  
512 and lateral bias and are largely absent from the most caudal portions of the DR.  
513 We further characterized VGLUT3 protein expression in *Pet1* neurons by  
514 VGLUT3 immunohistology in *Vglut3::IRES-cre;Pet1::Flpe; RC::FL-hM3Dq* mice.  
515 We found consistent overlap between intersectional recombination marked  
516 neurons and VGLUT3 protein expression, especially in medial, ventromedial, and  
517 caudal portions of the DR (**Figure 3–figure supplement 1C-J**). In the dorsal and  
518 lateral portions of the DR, however, where there are far fewer intersectionally  
519 labeled neurons, we observed a small number of *Vglut3::cre;Pet1::Flpe*  
520 intersectionally marked neurons that were negative for VGLUT3 antibody  
521 staining, suggesting transient expression of *Vglut3* (and *Vglut3::IRES-cre*) by  
522 these cells at an earlier time in their developmental history (or low *Vglut3*  
523 expression sufficient to drive Cre expression, but not VGLUT3 immunodetection).

524 Transcripts for *Npy2r*, encoding the neuropeptide Y receptor 2, are strongly  
525 enriched in clusters six, seven, and ten, with less consistent expression in  
526 clusters eleven, thirteen, and eight, and only sporadic expression elsewhere  
527 (**Figure 3C**). In mid-rostral portions of the DR, we found that  
528 *Npy2r::cre;Pet1::Flpe* intersectionally marked cell bodies show a largely midline  
529 bias, with a greater density of cells ventrally than dorsally, and the occasional  
530 labeled cell body appearing more laterally (**Figure 3C2-C3**). In more caudal

531 extents of the DR, *Npy2r::cre;Pet1::Flpe* intersectionally marked cell bodies  
532 appear to be concentrated more medially (**Figure 3C4-C6**).

533 Transcripts for *Crh*, encoding corticotropin-releasing hormone, are most highly  
534 enriched in neurons comprising cluster nine and to a lesser extent cluster five,  
535 with sporadic expression in other clusters (**Figure 3D**). *Crh::cre;Pet1::Flpe*  
536 intersectionally labeled neurons do not show an obvious overall anatomical bias,  
537 distributing widely throughout the DR (**Figure 3D1-D6**). At the most rostral levels  
538 of the DR, they appear to be more consistently medially and ventrally localized  
539 (**Figure 3D1-D2**), but additionally appear in the dorsal and lateral DR at mid-  
540 rostral levels, and are preferentially localized off the midline more ventrally in  
541 these same sections (in regions sometimes referred to as the ventrolateral  
542 wings) (**Figure 2D3-D4**). At the most caudal levels they distribute dorsally and  
543 ventrally, with an apparent gap between these two domains (**Figure 3D5-D6**).

544 The most molecularly distinct *Pet1* neuron subtype we identified, cluster twelve  
545 *Met-Vglut3-Tph2-Pet1* neurons, shows highly specific enrichment for a number of  
546 transcripts, including *P2ry1*, encoding purinergic receptor P2Y1, which is only  
547 sporadically expressed in other clusters (**Figure 3E**). *P2ry1::cre;Pet1::Flpe*  
548 intersectionally marked neurons likewise show a strikingly unique anatomical  
549 distribution from the other subgroups examined, being largely restricted to the  
550 caudal DR where they are densely clustered dorsally, just beneath the aqueduct  
551 (**Figure 3E5-E6**). This is consistent with previous characterizations of *Met*-  
552 expressing *Pet1/5*-HT neurons (Okaty et al., 2015; Wu and Levitt, 2013), as well  
553 as other more recent characterizations (Huang et al., 2019; Kast et al., 2017;  
554 Ren et al., 2019). Notably the distribution of *P2ry1::cre;Pet1::Flpe* intersectional  
555 neurons within the cDR is distinct from *Npy2r::cre;Pet1Flpe* intersectional  
556 neurons, and only partially overlaps with where *Crh::cre;Pet1::Flpe* intersectional  
557 neurons are found, arguing for *Pet1/5*-HT neuron subtype diversity within the  
558 caudal DR, consistent with (Kast et al., 2017).

559 It should be noted that the precise anatomical boundaries of the caudal DR  
560 (cDR), also referred to as B6 (Dahlstroem and Fuxe, 1964; Jacobs and Azmitia,  
561 1992)), are variably described in the literature. Alonso and colleagues divide B6  
562 into dorsal and ventral sub-compartments, referred to as r1DRd and r1DRv,  
563 respectively, where “r1” designates the putative developmental domain of origin  
564 of *Pet1* neurons residing in this DR sub-region (i.e. originating from r1, as  
565 opposed to isthmus)(Alonso et al., 2013). r1DRv likely corresponds to what  
566 others have described as the caudal portion of the “interfascicular” DR (DRI), a  
567 medioventral band of DR cells flanked on either side by the medial longitudinal  
568 fasciculi. 5-HT neurons of the caudal DRI merge with the more dorsal B6 DR  
569 sub-nucleus roughly at the level of the DR where dorsolateral 5-HT neurons  
570 become sparse (coronal sections 5 and 6 in **Figure 3**) (Hale and Lowry, 2011;  
571 Jacobs and Azmitia, 1992). Depending on the plane and angle of sectioning  
572 these caudal DRI cells also appear to merge with MR 5-HT neurons more  
573 ventrally, and it has been proposed that caudal DRI cells may be more similar to  
574 MR 5-HT neurons developmentally, morphologically, and hodologically than to  
575 DR 5-HT neurons (Commons, 2015, 2016; Hale and Lowry, 2011; Jacobs and  
576 Azmitia, 1992). In the present study, our designation of cDR is inclusive of  
577 r1DRd/r1DRv/caudal DRI/B6, as indicated in **Figure 4A**. Moreover, we do not  
578 discount the possibility that this region as drawn partially overlaps with what  
579 Alonso and colleagues would call the most dorsal portion of the caudal median  
580 raphe (MnRc), as the boundary between the MnRc and r1DRv is poorly defined.  
581 Thus, the territory between the cluster of *Met-Vglut3-Tph2-Pet1* neurons beneath  
582 the aqueduct in the cDR and the MR is difficult to classify strictly based on  
583 cytoarchitecture, underscoring the importance of alternative classification  
584 schemes, such as offered by transcriptomics.

### 585 *Manual scRNA-seq of Pet1-Intersectionally Defined Neuron Populations*

586 Having mapped the spatial distributions of intersectionally labeled *Pet1* neuron  
587 subgroups, next we wanted to explore the correspondence of molecular subtype  
588 identity with DR subregions more comprehensively. To do this, we

589 microdissected subdomains of the DR in a subset of the intersectional mouse  
590 lines just described, dissociated and sorted fluorescently labeled neurons,  
591 harvested mRNA from single cells, and prepared scRNA-seq libraries (n = 70  
592 single-cell libraries in total) using the SMART-Seq v4 kit, followed by Illumina  
593 sequencing (**Figure 4A**). Specifically, we separately microdissected and  
594 manually sorted *Sert::cre;Pet1::Flpe* intersectionally labeled neurons from the  
595 dorsolateral DR (dl or dlDR, n = 10 cells), dorsomedial DR (dm or dmDR, n = 9  
596 cells) ventromedial DR (vm or vmDR, n = 8 cells), and caudal DR (cDR, n = 6  
597 cells), as schematized in **Figure 4A**. Additionally, we separately microdissected  
598 and manually sorted *Npy2::cre;Pet1::Flpe* intersectional neurons from the rostral  
599 (rDR, n = 9 cells) versus caudal (n = 10 cells) DR, *P2ry1::cre;Pet1::Flpe*  
600 intersectional neurons from the cDR (n = 10 cells), and *Crh::cre;Pet1::Flpe*  
601 intersectional neurons from the rostromedial DR (n = 8 cells). We then used the  
602 fourteen *Pet1* neuron subtype identities derived from our 10X scRNA-seq data as  
603 a reference to “query” the corresponding identities of our manually sorted and  
604 transcriptomically profiled single cells (using the Seurat functions  
605 FindTransferAnchors and TransferData as described in (Stuart et al., 2019)). A  
606 summary of this analysis is shown in the dot plot in **Figure 4B**. We found that the  
607 majority of *Sert::cre;Pet1::Flpe* dlDR neurons mapped to cluster two, with a  
608 smaller percentage of single cells mapping to clusters one, three, and six.  
609 *Sert::cre;Pet1::Flpe* dmDR neurons were split between clusters two and three,  
610 and to a lesser extent four, five, and nine. *Sert::cre;Pet1::Flpe* vmDR neurons  
611 mostly corresponded to cluster ten, and were additionally mapped to clusters  
612 one, four, seven, and thirteen (note, this may suggest that some *Pet1* neurons  
613 expressing little or no *Sert* nor *Tph2* in the adult may yet express the *Sert::cre*  
614 transgene). Finally, *Sert::cre;Pet1::Flpe* cDR neurons mapped exclusively to  
615 clusters eight and seven (note, cluster twelve neurons do not appear to be well  
616 marked by *Sert::cre;Pet1::Flpe;RC::FrePe* eGFP expression – see **Figure 3A5**  
617 compared with **Figure 3E5** – perhaps reflecting the lower levels of *Sert*  
618 transcripts detected in these neurons).

619 The majority of *Npy2r::cre;Pet1::Flpe* neurons in the rDR were found to  
620 correspond to cluster six, with additional mapping to clusters five, seven, ten, and  
621 thirteen (consistent with the expression profile of *Npy2r* transcripts in the 10X  
622 scRNA-seq data) whereas the majority of *Npy2r:: cre;Pet1::Flpe* neurons from  
623 the cDR were found to correspond to cluster seven, with a smaller percentage  
624 corresponding to clusters ten and fourteen. *P2ry1::cre;Pet1::Flpe* cDR manually  
625 sorted and profiled neurons were mapped exclusively to cluster twelve as  
626 expected. *Crh::cre;Pet1::Flpe* profiled neurons were split across clusters in a  
627 manner consistent with sporadic *Crh* expression in our 10X scRNA-seq data,  
628 however, we found more cluster three than cluster nine *Crh::cre;Pet1::Flpe*  
629 neurons, perhaps reflecting that our sampling of this population was biased  
630 towards rostromedial DR (or a potential discrepancy between endogenous *Crh*  
631 expression and *Crh::cre* expression). Finally, we also included  
632 *Drd2::cre;Pet1::Flpe* intersectional scRNA-seq data (n = 17 cells) associated with  
633 a previous study from our lab (Niederkofler et al., 2016). *Drd2::cre;Pet1::Flpe*  
634 intersectional neurons show a largely dorsolateral and dorsomedial bias within  
635 the DR. The majority of these neurons map to clusters three and four, with a  
636 much smaller percentage mapping to clusters eight and eleven.

637 Thus combining intersectional genetics, histological analyses, and precisely  
638 targeted manual scRNA-seq we were able to infer the anatomical distributions of  
639 our fourteen clusters (**Figure 4C**). Clusters one through six and eleven appear to  
640 be dorsally, laterally and rostrally biased (to varying degrees), clusters seven,  
641 eight, and twelve appear to be caudally biased (as well as cluster fourteen, to a  
642 lesser extent), and the remaining clusters appear to be more ventromedial biased  
643 in the more rostral DR. Moreover, *Pet1-Tph2<sup>low</sup>* neurons (comprising cluster  
644 thirteen) show a prominent enrichment in the medial-rostral DR. Among caudal  
645 DR *Pet1* neuron clusters, cluster twelve shows a clear dorsal bias, whereas  
646 clusters seven and eight are likely more ventrally biased, based on **Figure 3A5-**  
647 **6, C5-6**, though a nontrivial degree of intermixing of different genetically defined  
648 *Pet1* neuron subpopulations in the dorsal cDR is apparent from these images.

649 Expression patterns of cluster marker genes showing strong anatomical biases in  
650 our manual scRNA-seq data are depicted in the dot plot in **Figure 4–figure**  
651 **supplement 1** in comparison with our 10X scRNA-seq data.

652 These inferred anatomical distributions of molecularly distinct *Pet1* neuron  
653 populations shed further light on the potential developmental significance of  
654 transcription factor expression patterns described above. As noted, *Pax5*, a gene  
655 associated with isthmic organizer activity during embryonic development  
656 (Funahashi et al., 1999; Ye et al., 2001), shows a complementary expression  
657 pattern to *Nr2f2*, which encodes a transcription factor that appears to be  
658 excluded from the isthmus, but is expressed in r1 and other rhombomeres during  
659 development, at least in zebrafish (Love and Prince, 2012). We further validated  
660 the anatomical expression profile of these genes, as well as *Satb2* (expressed by  
661 cluster two through four), at the level of protein expression by performing  
662 immunohistology in tissue sections prepared from *Vglut3::IRES-*  
663 *cre;Pet1::Flpe;RC::FL-hM3Dq* mice (**Figure 4–figure supplement 2 A-E**).  
664 Consistent with our anatomically-targeted, manual scRNA-seq data, PAX5 and  
665 SATB2 display a rostradorsal bias in predominately non-*Vglut3*-expressing DR  
666 *Pet1* neurons (**Figure 4–figure supplement 2B-C,E**), whereas NR2F2 has a  
667 ventromedial and caudal expression bias in predominately *Vglut3*-expressing DR  
668 *Pet1* neurons (**Figure 4–figure supplement 2D,E**). Alonso and colleagues have  
669 proposed that cDR *Pet1* neurons are derived from r1 progenitors, whereas more  
670 rostral *Pet1* neurons are derived from isthmus (Alonso et al., 2013), however  
671 further fate-mapping experiments would be helpful to clarify isthmic versus r1-  
672 derived *Pet1* neuron populations (Okaty et al., 2019). Moreover, while rostral DR  
673 *Pet1* neurons may derive from isthmus and cDR *Pet1* neurons may derive from  
674 r1, our scRNA-seq data nonetheless show substantial *Pet1* neuron molecular  
675 heterogeneity within both DR domains, suggesting factors beyond isthmus and  
676 r1-lineage driving molecular diversity.

677 **cDR *P2ry1::cre;Pet1::Flpe* neurons display unique hodological and**  
678 **electrophysiological properties**

679 Having established correlations between DR *Pet1* neuron molecular expression  
680 profiles and anatomical distribution of cell bodies, we next wanted to explore  
681 corresponding differences in other cellular phenotypes. We chose to focus on  
682 cluster twelve *Met-Vglut3-Tph2 Pet1* neurons, captured intersectionally by  
683 *P2ry1::IRES-cre;Pet1::Flpe*, as they are the most distinct from other *Pet1*  
684 neurons molecularly. To determine if these neurons are likewise unique from  
685 other DR *Pet1* neurons with respect to other features we explored the  
686 hodological and electrophysiology properties of *P2ry1::cre;Pet1::Flpe* neurons  
687 using the intersectional expression of TdTomato (*RC::Ai65*). The anatomical  
688 location of cell somata labeled in *P2ry1::IRES-cre;Pet1::Flpe;RC::Ai65* animals  
689 was similar to that found in the previously characterized *P2ry1::IRES-*  
690 *cre;Pet1::Flpe;RC::FrePe* mice, with a dense population of neurons directly under  
691 the aqueduct in the cDR. In addition, there were slightly higher numbers of  
692 intersectionally labeled cells in the rostral part of the dorsal raphe as well as  
693 scattered cells in the median raphe, consistent with the sporadic expression of  
694 *P2ry1* revealed by the present RNA-seq data and the scRNA-seq data of *Pet1*  
695 neurons from the MR (Okaty et al., 2015; Ren et al., 2019). Strikingly, most fibers  
696 from *P2ry1::cre;Pet1::Flpe;RC::Ai65* neurons were supra-ependymal and were  
697 found throughout the third, lateral, and fourth ventricles, a property previously  
698 attributed to 5-HT neurons within the cDR (Kast et al., 2017; Tong et al., 2014).  
699 Sparser fibers were found in regions such as the lateral hypothalamus, medial  
700 and lateral septum, olfactory bulb, lateral parabrachial nucleus and the  
701 amygdala. To gain a better perspective of the extent of *P2ry1::cre;*  
702 *Pet1::Flpe;RC::Ai65* fibers in the lateral ventricle we stained for  
703 *P2ry1::cre;Pet1::Flpe;RC::Ai65* fibers on a flat mount of the lateral wall as  
704 previously described (Mirzadeh 2010). *P2ry1::cre; Pet1::Flpe;RC::Ai65* fibers  
705 were found on all aspects of the wall except for the adhesion area, including  
706 regions that contain proliferating cells and migrating neuroblasts from the  
707 subventricular zone (Mirzadeh et al., 2010)(**Figure 5**). Further,  
708 *P2ry1::cre;Pet1::Flpe;RC::Ai65* fibers were closely apposed to proliferating cells  
709 (Ki67+) and migrating neuroblasts (doublecortin, DCX+) within the subventricular



710 zone (SVZ) and within the rostral migratory stream (RMS) (**Figure 5**). The  
711 proximity of *P2ry1::cre;Pet1::Flpe;RC::Ai65* fibers to adult neural stem cells  
712 suggests that they may constitute a serotonergic population of neurons that  
713 regulate SVZ proliferation, a process known to be regulated by 5-HT levels and  
714 that has previously been associated with the cDR (Aghajanian and Gallager,  
715 1975; Banasr et al., 2004; Brezun and Daszuta, 1999; Hitoshi et al., 2007; Kast  
716 et al., 2017; Lorez and Richards, 1982; Mirzadeh et al., 2010; Negoias et al.,  
717 2010; Siopi et al., 2016; Soumier et al., 2010; Tong et al., 2014).

718 We next characterized electrophysiological properties of *P2ry1::IRES-cre;*  
719 *Pet1::Flpe;RC::Ai65* neurons in comparison with other more broadly defined  
720 *Pet1* neuron subpopulations using whole-cell patch clamp in acute slice  
721 preparations. As comparison groups we chose: (1) “subtractive” *P2ry1::IRES-cre;*  
722 *Pet1::Flpe;RC::FL-hM3Dq* neurons in the cDR (i.e. cDR neurons with a history of  
723 *Pet1::Flpe* expression but not *P2ry1::IRES-cre* expression; we chose to use  
724 *RC::FL-hM3Dq* as opposed to *RC::Ai65* or *RC::FrePe* because the subtractive  
725 population is identifiable in acute brain slices by eGFP fluorescence without the  
726 need for secondary staining), and (2) *Gad2::IRES-cre;Pet1::Flpe;RC::Ai65*  
727 neurons from the more rostral and mostly dorsal DR (**Figure 6**). Recording from  
728 *P2ry1::IRES-cre;Pet1::Flpe;RC::FL-hM3Dq* subtractive cDR neurons allowed us  
729 to assess the degree to which electrophysiology may differ within a given DR  
730 subdomain depending on molecularly-defined neuron subtype, whereas  
731 *Gad2::IRES-cre;Pet1::Flpe;RC::Ai65* neuron recordings provided a comparison  
732 group that is both anatomically and molecularly distinct. As demonstrated in the  
733 F-I curves in **Figure 6A**, we found that *P2ry1::IRES-cre;Pet1::Flpe;RC::Ai65*  
734 neurons have dramatically lower excitability than the two comparison  
735 populations, requiring substantially more injected current to reach action potential  
736 threshold, and showing a roughly three-fold lower maximum firing rate. Even  
737 within the regime of current injection that *P2ry1::IRES-cre;Pet1::Flpe;RC::Ai65*  
738 neurons are excitable, we found that they displayed very different spiking  
739 characteristics from other *Pet1* neuron groups (Figure 6B-F), specifically showing

740 a longer latency to first action potential (AP, Figure 6D,F). Altogether, we  
741 observed four distinct firing types exemplified by the voltage traces displayed in  
742 **Figure 6B-E**: short-latency to first AP (regular spiking/non-adapting) (**Figure 6B**),  
743 mid-latency to first AP (**Figure 6C**), long-latency to first AP (**Figure 6D**), and  
744 short-latency to first AP with spike frequency adaptation (**Figure 6E**). The  
745 heatmap in **Figure 6F** shows the percentage of single-neuron recordings from  
746 each genotype that correspond to a given firing type. **Figure 6-figure**  
747 **supplement 1** displays differences in measured electrophysiological properties  
748 when cells are grouped by firing type, as opposed to genotype. All *P2ry1::IRES-*  
749 *cre;Pet1::Flpe;RC::Ai65* neurons recorded (twelve neurons from three animals)  
750 showed long latency to first AP, whereas only one out of nine subtractive  
751 neurons in the *P2ry1::IRES-cre;Pet1::Flpe;RC::FL-hM3Dq* cDR (from three  
752 animals) showed this phenotype and none of the *Gad2::IRES-*  
753 *cre;Pet1::Flpe;RC::Ai65* neurons (twelve neurons from two animals). These latter  
754 two groups of neurons showed greater heterogeneity with respect to firing  
755 characteristics, as might be expected given that labeled cells from both  
756 genotypes comprise multiple molecular subtypes identified by our scRNA-seq  
757 experiments. While the full extent of electrophysiological heterogeneity of these  
758 populations is likely under-sampled by the present dataset, the uniqueness of  
759 *P2ry1::IRES-cre;Pet1::Flpe;RC::Ai65* neurons nonetheless stands out.

## 760 **Comparison to other DR scRNA-seq datasets**

761 Recent scRNA-seq studies of mouse DR cell types have been published (Huang  
762 et al., 2019; Ren et al., 2019), reporting using either the InDrops platform to  
763 profile dissociated DR neurons (Huang et al., 2019) or fluorescence-activated cell  
764 sorting to purify dissociated Cre-dependent tdTomato-expressing *Sert::cre*  
765 neurons from mouse DR and MR, followed by SMART-Seq v2 library preparation  
766 and sequencing (Ren et al., 2019). Huang and colleagues identified six distinct  
767 *Pet1*-expressing DR neuron subtypes – five serotonergic and one glutamatergic  
768 – while Ren and colleagues identified seven *Pet1*-expressing serotonergic DR  
769 neuron subtypes (note they did not identify a glutamatergic *Tph2<sup>low</sup>* group,

770 presumably because these neurons do not typically express *Sert::cre*). To  
771 directly compare our subtype classifications, we used the fourteen *Pet1* neuron  
772 subtype identities derived from our 10X scRNA-seq data as a reference to query  
773 the corresponding identities of the Huang and Ren datasets (using the Seurat  
774 functions FindTransferAnchors and TransferData, as described above for  
775 comparison with our manual scRNA-seq data). The results of this analysis are  
776 shown in the dot plot in **Figure 7**. Some *Pet1* neuron subgroup classifications  
777 were highly consistent across studies. For example, one hundred percent of  
778 single neurons making up the Huang 5-HT V and Ren cDR subgroups map to  
779 our cluster twelve *Pet1* neuron subgroup (*Met-Vglut3-Tph2-Pet1* neurons,  
780 corresponding to neurons intersectionally captured by *P2ry1::cre;Pet1::Flpe*  
781 expression in the cDR shown in **Figure 3E**). Likewise, there is high  
782 correspondence between Huang 5-HT I, Ren DR 1, and our cluster-two *Pet1*-  
783 neuron subgroup (dorsolateral DR *Gad2-Trh-Tph2-Pet1* neurons). Huang 5-HT II  
784 and Ren 2 subgroups are largely split between our cluster two and cluster three  
785 subgroups, with a smaller portion of each mapping to our cluster four subgroup  
786 (which also corresponds to a small subset of Huang 5-HT I and Ren DR 1  
787 neurons). Huang 5-HT III and Ren DR 3 correspond to our cluster five and six  
788 subgroups, with a larger percentage of Huang 5-HT III neurons mapping to  
789 cluster five and a larger percentage of Ren DR 3 neurons mapping to cluster six.

790 In other cases, there is better correspondence between our identified *Pet1*  
791 neuron subgroups and one or the other study, likely due in part to technological  
792 differences between studies. For example, Huang Glu V corresponds well with  
793 our cluster thirteen *Pet1* neuron subgroup (*Vglut3-Tph2<sup>low</sup>-Pet1* neurons) but very  
794 few neurons profiled in the Ren study map to cluster thirteen. As mentioned  
795 above, the absence of a prominent glutamatergic *Tph2<sup>low</sup>* group of neurons in the  
796 Ren study likely stems from the fact that the low level of *Sert* transcription in  
797 these neurons does not reliably drive *Sert::cre* transgene expression and thus  
798 reporter expression for their cell sorting. However, the fact that a small number of  
799 *Sert::cre* expressing neurons from the Ren study do map to our cluster thirteen

800 subgroup indicates that there may be exceptions (moreover, these cells may  
801 more specifically map to cluster thirteen neurons at the higher end of the  
802 distribution of *Sert* and *Tph2* transcript levels **Figure 1–figure supplement 3**).

803 On the other hand, Ren DR 6 corresponds well with our cluster one subgroup  
804 (*Npas1/3-Tph2-Pet1* neurons) and Ren DR 4 corresponds well with our cluster  
805 nine subgroup (*Maf-Nos1-Tph2-Pet1* neurons), but there is no such one-to-one  
806 correspondence between these groups and the neuron groups identified in the  
807 Huang study. Rather, cluster one and cluster nine neurons get “pulled” from other  
808 groups identified by Huang. This likely reflects the different sensitivities of the  
809 various approaches. Specifically, our study and the Ren study achieved more  
810 than three-fold higher gene detection per single cell library on average than the  
811 Huang study, thus allowing for finer-scale molecular subgroup classification.  
812 However our higher single-cell sampling resolution – we profiled 2,350 DR *Pet1*  
813 neurons, whereas Huang and Ren each profiled roughly seven hundred DR *Pet1*  
814 neurons – ultimately allowed us to resolve more subgroups. Huang 5-HT IV and  
815 Ren DR 5 show the greatest degree of dispersion into different clusters identified  
816 in our study. Ren DR 5 is split predominately between clusters seven, ten, and  
817 fourteen, while Huang 5-HT IV is split into clusters ten and fourteen, as well as  
818 across several other clusters. Importantly, our higher number of identified  
819 clusters does not appear to stem from analytic differences between studies *per*  
820 *se*, given that we identified more clusters using a lower resolution parameter in  
821 our clustering analysis than the other two studies. Huang, et al. reported using a  
822 Seurat FindCluster resolution of 2.0, Ren, et al. used a resolution of 1.0, whereas  
823 the highest resolution we used was 0.9.

824 Lastly, we also found that Ren MR 1 (identified as being a median raphe 5-HT  
825 neuron subtype in that study) shows striking similarity to our cluster eight  
826 subgroup, which we have mapped to the cDR based on histology and our  
827 manual scRNA-seq data. As described above, the boundary between the cDR  
828 and the MR, specifically the portion of the MR attributed to r1-derived neurons  
829 (Alonso et al., 2013; Okaty et al., 2015), is poorly defined, thus Ren MR 1 and

830 our cluster eight neurons may indeed partially overlap anatomically. Notably,  
831 some Huang 5-HT IV neurons (microdissected from what was considered the DR  
832 in that study) also map to our cluster eight subgroup.

### 833 **Discussion**

834 The dorsal raphe nucleus is likely one of the most extensively connected hubs in  
835 the mammalian brain. Efferent DR fibers, predominantly serotonergic (but also  
836 glutamatergic and GABAergic), collectively innervate much of the forebrain and  
837 midbrain, as well as some hindbrain nuclei (Azmitia and Segal, 1978; Bang and  
838 Commons, 2012; Bang et al., 2012; Beaudet and Descarries, 1976; Fernandez et  
839 al., 2016; Gagnon and Parent, 2014; Hale and Lowry, 2011; Kast et al., 2017;  
840 Kosofsky and Molliver, 1987; Lidov et al., 1980; Lidov and Molliver, 1982;  
841 Maddaloni et al., 2017; McDevitt et al., 2014; Molliver, 1987; Muzerelle et al.,  
842 2016; O'Hearn and Molliver, 1984; Prouty et al., 2017; Ren et al., 2018;  
843 Steinbusch, 1981; Steinbusch et al., 1980; Vasudeva et al., 2011; Vertes, 1991;  
844 Vertes and Kocsis, 1994), and DR afferents have been identified from as many  
845 as eighty distinct anatomical brain regions, including other brainstem raphe  
846 nuclei (Celada et al., 2001; Commons, 2015; Goncalves et al., 2009; Levine and  
847 Jacobs, 1992; Mosko et al., 1977; Ogawa et al., 2014; Peyron et al., 1998;  
848 Peyron et al., 2018; Pollak Dorocic et al., 2014; Weissbourd et al., 2014). As  
849 such, the DR is hodologically poised to broadcast and receive signals related to a  
850 wide range of sensory, motor, affective, and cognitive processes. Indeed, DR  
851 neuropathology is associated with several human disorders (or disease models  
852 thereof) with broad symptomatology, such as major depressive disorder, autism,  
853 and Alzheimer's disease (Chen et al., 2000; Dengler-Crish et al., 2017; Ellegood  
854 et al., 2015; Guo and Commons, 2017; Ji et al., 2020; Luo et al., 2017; Michelsen  
855 et al., 2008; Miyazaki et al., 2005; Simic et al., 2017; Vakalopoulos, 2017; Wang  
856 et al., 2018; Zweig et al., 1988). Outside of DR-specialist research, the DR has  
857 often been viewed by the wider neuroscience community as a "black box" source  
858 of a single neurochemical, namely 5-HT. Accordingly, development of  
859 therapeutics for associated disorders has largely focused on modulating overall

860 serotonergic tone. However, DR-focused research over several decades has  
861 revealed layers of functional complexity and compositional heterogeneity  
862 warranting a more nuanced view (reviewed in (Abrams et al., 2004; Andrade and  
863 Haj-Dahmane, 2013; Gaspar and Lillesaar, 2012; Hale and Lowry, 2011;  
864 Michelsen et al., 2007; Okaty et al., 2019; Vasudeva et al., 2011)). While these  
865 studies have reached into the black box of the DR and described a variety of  
866 features at different levels of observation, integration across levels to arrive at  
867 principles of DR organization has proved challenging. Elucidating how molecular,  
868 neurochemical, anatomical, hodological, electrophysiological, and functional  
869 descriptions of the DR overlap is essential to understanding the structure-  
870 function relationship of the DR and other raphe nuclei (Brust et al., 2014;  
871 Fernandez et al., 2016; Huang et al., 2019; Kast et al., 2017; Niederkofler et al.,  
872 2016; Okaty et al., 2015; Prouty et al., 2017; Ren et al., 2018; Ren et al., 2019),  
873 and will likely facilitate improved therapies for human disorders. Here we have  
874 focused on one broadly defined subgroup of DR cells – neurons that express the  
875 gene *Pet1/Fev* – and applied scRNA-seq, iterative intersectional genetics,  
876 histology, and slice electrophysiology to provide a transcriptomic and anatomic  
877 atlas of mouse DR *Pet1* neurons with examples of links between molecular,  
878 neurochemical, anatomical, hodological, and electrophysiological levels of  
879 description. We identify as many as fourteen distinct molecularly defined  
880 subtypes of *Pet1* neurons that show biased cell body distributions in DR sub-  
881 regions. We further characterize projections and electrophysiology of the most  
882 molecularly unique DR *Pet1* neuron subtype – *Met-Vglut3-Tph2-Pet1* cDR  
883 neurons (cluster twelve), genetically accessed by intersectional  
884 *P2ry1::cre;Pet1::Flpe* expression. The present study complements other recent  
885 characterizations of DR cell types (Huang et al., 2019; Ren et al., 2019),  
886 increasing the sampling resolution of *Pet1* neurons in particular through our  
887 experimental approach to achieve fine-scale identification of *Pet1* neuron  
888 subtypes.

889 ***Molecular and anatomic organization of Pet1 neuron subtypes***

890 Our data and analysis highlight the hierarchical organization of DR *Pet1* neurons  
891 molecularly and anatomically, allowing for identification of features that organize  
892 *Pet1* neurons at different levels of granularity (**Figure 8**). Neurochemistry has  
893 long served as a principal phenotypic axis for classifying neurons, and  
894 concordantly we found that distributions of transcripts associated with distinct  
895 neurotransmitters correspond with broad subgroup divisions. The majority of  
896 *Pet1* neurons (clusters one through twelve) express high levels of *Tph2* mRNA,  
897 encoding tryptophan hydroxylase two, the rate-limiting biosynthetic enzyme for 5-  
898 HT, as well as several other genes indicative of a serotonergic phenotype, such  
899 as *Slc6a4* (*Sert*), *Slc18a2* (*Vmat2*), and *Maob*. However, we also identified two  
900 subgroups of *Pet1* neurons with 5-HT marker gene profiles that differ from the  
901 majority (clusters thirteen and fourteen). One subgroup (cluster thirteen)  
902 expresses very low transcript levels of 5-HT neuron marker genes, is mostly  
903 negative for TPH2 immunolabeling, and shows a biased cell body distribution in  
904 the rostromedial DR, as well as distributing sporadically throughout. The other  
905 subgroup (cluster fourteen) exhibits a much broader distribution of transcript  
906 levels for 5-HT marker genes than other groups. The functional significance of  
907 this variable expression can only be hypothesized at present; we speculate that it  
908 may reflect a capacity for neurotransmitter plasticity – i.e. experience-dependent  
909 induction or up-regulation of 5-HT phenotype, as hinted at by a recent study  
910 (Prakash et al., 2019). If this is the case, cluster fourteen neurons may be  
911 partially in transition, for example, from a predominately glutamatergic phenotype  
912 to a 5-HT phenotype or to a glutamate-5-HT co-transmitter phenotype. Both  
913 cluster thirteen and fourteen *Pet1* neuron subgroups express *Slc17a8* (*Vglut3*)  
914 transcripts, suggestive of a capacity for synaptic glutamate packaging and  
915 release, and show shared enrichment for several transcripts, including *Ldb2*,  
916 encoding the transcription factor LIM domain binding 2, and *Cnr1*, encoding  
917 cannabinoid receptor 1. Cluster fourteen is also uniquely distinguished by  
918 enrichment for *Gpr101* transcripts, encoding an orphan G protein-coupled  
919 receptor.

920 Among *Pet1* neurons expressing high levels of *Tph2* and other 5-HT gene  
921 markers, expression of genes related to GABA synthesis (*Gad1* and *Gad2*) or  
922 glutamatergic synaptic vesicle packaging (*Vglut3*) correlate with major molecular  
923 and anatomical subdivisions (evident in the dendrogram in **Figure 1B**, the UMAP  
924 plot in **Figure 1C**, and the histological image series in **Figure 3 B1-6** and **Figure**  
925 **3 – figure supplement 1D-J**). We found that the cell bodies of non-*Vglut3*,  
926 largely *Gad2*-expressing *Pet1* neurons are preferentially distributed in the dorsal  
927 and lateral sub-regions of the rostral DR, and become exclusively lateral and  
928 ultimately absent at more caudal extents of the DR. Conversely, *Vglut3-Tph2-*  
929 *Pet1* neuron bodies show a ventromedial bias rostrally and predominate the  
930 entire cDR. *Gad2-Tph2-Pet1* neurons and *Vglut3-Tph2-Pet1* neurons show  
931 differential enrichment of hundreds of transcripts, including *Pax5* and *Nr2f2*. Both  
932 genes encode transcription factors, the expression of which we examined  
933 through immunohistology and found a similar distribution of cell body staining as  
934 revealed by intersectional genetic labeling of *Vglut3::cre;Pet1::Flpe* neurons –  
935 *Pax5* expression overlaps predominately with the non-*Vglut3*-expressing  
936 population, whereas *Nr2f2* overlaps with the *Vglut3*-expressing population  
937 (**Figure 4 – figure supplement 2**). We also found one *Pet1* neuron subgroup  
938 (cluster six) that expresses *Gad1*, *Gad2*, and “intermediate” levels of *Vglut3*  
939 transcripts (relative to other *Vglut3+* clusters). These neurons correspond with  
940 the rostral population of neurons labeled by intersectional *Npy2r::cre;Pet1::Flpe*  
941 expression (**Figure 3C**), which we characterized by manual scRNA-seq (**Figure**  
942 **4**).

943 Altogether we identified five *Pet1* neuron subgroups that express *Gad1* or *Gad2*  
944 transcripts (clusters two through six), and found *Gad2* to be expressed more  
945 consistently and at higher levels than *Gad1* (with the exception of cluster six).  
946 *Gad1* and *Gad2* encode two distinct isoforms of glutamate decarboxylase,  
947 referred to as GAD67 and GAD65, respectively. In many neuron types, these  
948 proteins are often co-expressed, but localize to different subcellular  
949 compartments and differ in their interaction with the co-factor pyridoxol



950 phosphate (Chen et al., 2003; Erlander et al., 1991; Soghomonian and Martin,  
951 1998). GAD65 (encoded by *Gad2*) is typically found in axon terminals where it is  
952 thought to play a role in GABA synthesis specifically for synaptic vesicular  
953 release, whereas GAD67 is typically localized to the soma and may be more  
954 involved with non-vesicular GABA release. While we did not reliably detect  
955 transcripts for the vesicular GABA transporter (*Slc32a1*), we did detect  
956 expression of transcripts encoding VMAT2 which has been shown to package  
957 GABA into synaptic vesicles in dopaminergic neurons, allowing for  
958 monoaminergic-GABAergic co-transmission (Tritsch et al., 2012). Thus it is  
959 plausible that *Gad2-Tph2-Pet1* neurons may likewise co-release GABA, though it  
960 has yet to be reported in the literature.

961 Beyond classic neurotransmitters, we also found enrichment of various peptide  
962 hormone transmitters in different *Gad2-Tph2-Pet1* neuron subgroups. Cluster  
963 two shows enrichment for thyrotropin-releasing hormone transcripts (*Trh*), and  
964 clusters five and six show enrichment for prodynorphin (*Pdyn*) (as does cluster  
965 fourteen). As can be seen in the dendrogram in **Figure 1B** and UMAP plot in  
966 **Figure 1C**, there appears to be a major division between *Gad2-Tph2-Pet1*  
967 clusters two through four and clusters five and six, with clusters five and six also  
968 sharing many molecular similarities with *Vglut3-Tph2-Pet1* subgroups. This may  
969 in part reflect differential expression of transcription factors that regulate  
970 divergent gene “modules”. While all *Gad2-Tph2-Pet1* neurons express *Pax5*,  
971 clusters two through four also express *Sox14* and *Satb2*. Cluster six, on the other  
972 hand, shows enrichment for several transcription factor genes that are also  
973 enriched (or trend towards enrichment) in clusters thirteen and fourteen, such as  
974 *Pou3f2*, *Bcl11a*, and *Id2*. These molecularly distinct *Gad2-Tph2-Pet1* subgroups  
975 also show differences in anatomy. Based on manual scRNA-seq of sub-  
976 anatomically targeted *Pet1* neurons, we found that cluster two *Gad2-Trh-Tph2-*  
977 *Pet1* neuron cell bodies are found predominately in the dorsolateral DR, as well  
978 as the dorsomedial DR, whereas clusters three, four, and five appear to be more  
979 dorsomedially biased, consistent with recent reports (Huang et al., 2019; Ren et

980 al., 2019). Cluster six neurons, as captured by *Npy2r::cre;Pet1::Flpe* expression,  
981 show a more diffuse distribution in the rostral DR, illustrating that not all *Pet1*  
982 neuron subtypes, as defined transcriptomically, correspond with clear-cut  
983 anatomical patterns. Indeed, while there are major differences between  
984 predominately dorsal versus ventral or rostral versus caudal DR *Pet1* neuron  
985 subtypes, different subtypes nonetheless intermix within these domains,  
986 emphasizing the importance of molecular-genetic targeting of *Pet1* neuron  
987 subtypes to gain specificity for functional characterization (a point also made by  
988 (Huang et al., 2019) and (Okaty et al., 2019)).

989 *Vglut3-Tph2-Pet1* neuron subgroups, as noted above, are found more ventrally  
990 than *Gad2-Tph2-Pet1* neurons in the rostral DR, and are the dominant  
991 neurotransmitter phenotype in the caudal DR (as inferred by transcript  
992 expression and VGLUT3 and TPH2 immunostaining). We found two *Vglut3-*  
993 *Tph2-Pet1* neuron subtypes with cell bodies biased towards the rostral DR  
994 (clusters nine and ten) and three subtypes (clusters seven, eight, and twelve)  
995 biased towards the more caudal DR (as delineated in **Figure 4**, and see the  
996 discussion of varying nomenclature around the cDR in the **Results** section  
997 *Histology of Pet1-Intersectionally Defined Neuron Populations* above). Cluster  
998 twelve *Pet1* neurons, also marked by expression of the gene *Met*, we found to be  
999 the most different from all other *Pet1* neurons, both in terms of the number of  
1000 differentially expressed genes and the magnitudes of enrichment/depletion  
1001 compared to other *Pet1* neuron subtypes (as also observed by (Huang et al.,  
1002 2019; Ren et al., 2019)). We show by histology of genetically marked neurons  
1003 (intersectional *P2ry1::cre;Pet1::Flpe* expression) that the cell bodies of these  
1004 *Met-Vglut3-Tph2-Pet1* neurons are clustered beneath the aqueduct in the caudal  
1005 DR (Figure 3E) and send extensive axonal projections throughout the ventricles  
1006 (Figure 5). Based on retrograde tracing experiments (Kast et al., 2017; Tong et  
1007 al., 2014), it is likely that these neurons constitute the major source of 5-HT  
1008 innervation to the ventricles. Furthermore, our demonstration that  
1009 *P2ry1::cre;Pet1::Flpe* fibers are closely apposed with proliferating and migrating

1010 cells in the SVZ and rostral migratory stream (**Figure 5**), supports a proposed  
1011 role for these neurons in regulating adult neural stem cell proliferation in the SVZ  
1012 (Tong et al., 2014). Cluster twelve neuron transcript enrichment for several  
1013 GPCRs implicated in modulation of adult neurogenesis, such as *P2ry1* (Lin et al.,  
1014 2007), *Gipr* (found to be enriched in our *P2ry1::cre;Pet1::Flpe* manual scRNA-  
1015 seq data) (Nyberg et al., 2005), *S1pr3* (Alfonso et al., 2015; Ye et al., 2016), and  
1016 *Oprm1* (Harburg et al., 2007) lends further support to this hypothesis. Now, with  
1017 intersectional access to this population of cDR 5-HT neurons provided by  
1018 *P2ry1::IRES-cre* with *Pet1::Flpe*, the function of *Met-Vglut3-Tph2-Pet1* cDR  
1019 neurons in regulating SVZ proliferation can be tested directly in a cell type-  
1020 specific manner using dual Cre- and Flpe- responsive chemo- or optogenetic  
1021 approaches (Brust et al., 2014; Hennessy et al., 2017; Kim et al., 2009; Madisen  
1022 et al., 2015; Niederkofler et al., 2016; Okaty et al., 2015; Ray et al., 2011;  
1023 Sciolino et al., 2016; Teissier et al., 2015).

#### 1024 **DR *Pet1* neuron subtypes have distinct electrophysiological properties**

1025 To further characterize correspondence of molecular identities with other cell  
1026 phenotypes we performed whole-cell electrophysiological recordings in acute  
1027 slices prepared from mice in which different *Pet1* neuron subsets were  
1028 genetically labeled. We found that 5-HT neurons with different molecular  
1029 identities also exhibit distinct electrophysiological properties likely to impact their  
1030 circuit function. While we did not comprehensively sample all molecularly defined  
1031 subtypes, our survey of cDR *Pet1* neurons and rostradorsal *Gad2::cre;Pet1::Flpe*  
1032 neurons provides evidence for at least four distinct electrophysiological types  
1033 based on four key properties: (1) rheobase (also known as current threshold),  
1034 which reflects a neuron's sensitivity to input, (2) delay to first spike, which reflects  
1035 the degree to which a neuron is able to activate phasically in response to input,  
1036 (3) spike-frequency adaptation, which reflects the degree to which a neuron is  
1037 able to continuously signal ongoing input, and (4) maximum firing rate, which  
1038 determines the dynamic range of neuron responsiveness to graded inputs. As  
1039 with molecular differences, cluster twelve *Met-Vglut3-Tph2-Pet1* cDR neurons

1040 (*P2ry1::cre;Pet1::Flpe* intersectional expression) showed profound differences  
1041 from other subtypes, including other cDR *Pet1* neurons. *P2ry1::cre;Pet1::Flpe*  
1042 neurons consistently displayed a long latency to first action potential, required  
1043 substantially more input to reach action potential threshold, and had a lower  
1044 maximum firing rate (**Figure 6 and Figure 6 – figure supplement 1**). These  
1045 differences, together with differential transcript expression of several GPCRs,  
1046 suggest that *Met-Vglut3-Tph2-Pet1* cDR neurons respond in a different way and  
1047 to very different stimuli than other DR *Pet1* neuron types. For example, low  
1048 excitability and long-latency to spike suggest that these neurons may only be  
1049 recruited by very strong stimuli at relatively slower timescales than other *Pet1*  
1050 neurons (to the extent that properties recorded in slice reflect *in vivo* properties).  
1051 Notably, 5-HT neurons with this electrophysiological profile have not yet been  
1052 reported in the literature. However, the two firing types that we have defined as  
1053 “Short-Latency to First AP; Non-Adapting” and “Mid-Latency to First AP” (**Figure**  
1054 **6B,C**) correspond well to those described by (Fernandez et al., 2016) in groups  
1055 of *Pet1-eGFP* serotonergic neurons projecting to the mPFC and the BLA,  
1056 respectively. Differential expression of Ion channels and receptors identified here  
1057 suggest molecular substrates of these different electrophysiological properties.

### 1058 **Technical aspects of our study allow for high-resolution transcriptome** 1059 **characterization of *Pet1* neurons**

1060 Due to the high-dimensional “richness” of transcriptomic data, together with the  
1061 capacity to propose explanations of cellular phenotypes in terms of molecular  
1062 mechanisms – RNA-seq dissection of neural circuits has gained traction as a  
1063 way to define and enumerate cell types in the brain (and other tissues). Single-  
1064 cell RNA-sequencing, in particular, has become an indispensable approach, with  
1065 different methods achieving different resolution of underlying cellular diversity  
1066 (Bakken et al., 2018; Campbell et al., 2017; Hodge et al., 2019; Huang et al.,  
1067 2019; Lovatt et al., 2014; Macosko et al., 2015; Okaty et al., 2015; Poulin et al.,  
1068 2016; Ren et al., 2019; Rosenberg et al., 2018; Saunders et al., 2018; Spaethling  
1069 et al., 2014; Tasic, 2018; Tasic et al., 2016; Tasic et al., 2018; Usoskin et al.,

1070 2015; Zeisel et al., 2018; Zeisel et al., 2015). Droplet-based scRNA-seq  
1071 approaches (without cell-type-specific purification) allow for unbiased  
1072 classification of major cell types residing in a particular microdissected tissue  
1073 region of interest, however lower abundance cell types, such as DR *Pet1*  
1074 neurons profiled in the present study, are often insufficiently sampled to achieve  
1075 high resolution of subtype molecular diversity. Moreover, different reaction  
1076 chemistries employed in different droplet-based scRNA-seq approaches can lead  
1077 to different gene detection sensitivity. Low cellular abundance compounded with  
1078 low gene detection can greatly limit the power of a study to reveal fine-scale  
1079 variation in molecular phenotypes that may be important for identifying neuronal  
1080 subtypes and subtype “states” (e.g. adaptive or pathological transcriptional  
1081 variation). Where cell type-specific markers are available, cell sorting prior to  
1082 scRNA-seq library preparation can greatly enhance the resolution of cellular  
1083 diversity for less abundant cell classes. While manual sorting approaches  
1084 combined with RNA-seq library preparation optimized for low amounts of input  
1085 RNA achieve high single-cell gene detection and allow for sampling genetically  
1086 and anatomically-defined neuron populations (Niederkofler et al., 2016; Okaty et  
1087 al., 2015), they are often limited in the number of cells profiled, and therefore  
1088 may lack sufficient throughput to fully characterize subtype diversity. On the other  
1089 hand, automated sorting approaches achieve greater throughput but are less well  
1090 suited to collecting low abundance cell types, such as defined by fine-scale  
1091 anatomy or highly restricted marker gene expression. Our particular experimental  
1092 approach to characterizing DR *Pet1*-lineage neuron diversity in the present study  
1093 was informed by all of the above concerns. By combining intersectional genetic  
1094 labeling of DR *Pet1* neurons with both high-throughput (On-chip microfluidics)  
1095 and targeted low-throughput (manual) sorting approaches, followed by high-  
1096 sensitivity RNA-seq library preparation protocols (10X Genomics Chromium  
1097 Single Cell 3’ v3 and SMART-Seq v4 kits, respectively) we leveraged the  
1098 strengths of multiple approaches to achieve high-resolution transcriptomic  
1099 profiling of DR *Pet1* neurons.

## 1100 **Resource value of DR *Pet1* neuron scRNA-seq data**

1101 While we have highlighted many salient experimental findings in the present  
1102 report, the data no doubt have more to reveal, and we thus offer this dataset as a  
1103 resource to be mined by the larger community in the hopes that it may facilitate  
1104 and stimulate future studies (**GEO accession number pending**). For example,  
1105 newly identified *Pet1* neuron subtype marker genes may guide development of  
1106 new recombinase driver lines allowing for subtype-specific genetic access, or  
1107 shape approaches for developing more targeted therapeutics. Moreover, we  
1108 hope this work, together with other recent studies (Huang et al., 2019; Ren et al.,  
1109 2019), may lead to the development of a standardized DR *Pet1* neuron subtype  
1110 nomenclature that allows for consolidation of results across different labs and  
1111 different data modalities.

1112

## 1113 **Methods**

### 1114 **Intersectional genetic fate mapping**

1115 Triple transgenic mice were generated by crossing *Pet1::Flpe; FrePe* (Brust et  
1116 al., 2014; Jensen et al., 2008; Okaty et al., 2015) or *Pet1::Flpe; Ai65* (Madisen et  
1117 al., 2015) mice with *Sert::cre* (Gong et al., 2007), *Npy2r::IRES-cre* (Chang et al.,  
1118 2015), *En1::cre* (Kimmel et al., 2000), *Crh::cre*  
1119 ([https://www.mmrrc.org/catalog/sds.php?mmrrc\\_id=30850](https://www.mmrrc.org/catalog/sds.php?mmrrc_id=30850)), and *P2ry1::IRES-cre*  
1120 (Chang et al., 2015) mice, or by crossing *Pet1::Flpe; hM3Dq* (Sciolino et al.,  
1121 2016) mice with *Vglut3::IRES-cre* mice (<https://www.jax.org/strain/028534>).

### 1122 **Perfusion and immunohistochemistry**

1123 Anesthetized mice were transcardially perfused with cold phosphate-buffered  
1124 saline (PBS) followed by 4% paraformaldehyde (PFA) overnight. Tissue was  
1125 dissected and fixed in 4% PFA overnight followed by cryoprotection in 30%

1126 sucrose/PBS until equilibrated (~48 hours) before being frozen in tissue freezing  
1127 medium (Triangle Biomedical Services). Tissue was cryosectioned in 40um  
1128 coronal sections and processed as floating sections.

1129 For fluorescent staining, sections were washed with PBS and PBS with 0.1%  
1130 Triton-X-100 (PBS-T), blocked in 5% normal donkey serum (NDS) and 1%  
1131 bovine serum albumin (BSA) for 2 hours at room temperature (RT), and  
1132 incubated with primary antibody at 4°C for 48 hours: anti-GFP (1:3000, chicken  
1133 polyclonal, Aves Labs, GFP-1020), anti-DsRed (1:1000, rabbit polyclonal,  
1134 Takara, 632496), anti-TPH2 (1:1000, rabbit polyclonal, Novus Biologicals,  
1135 NB100-74555), anti-Pax5 (1:1000, goat polyclonal, Santa Cruz, sc-1974), anti-  
1136 SATB2 (1:1000, guinea pig polyclonal, Synaptic Systems, 327-004), anti-COUP-  
1137 TFII (1:1000, mouse monoclonal, Perseus Proteomics, PP-H7 147-00), anti-  
1138 ZEB2 (1:200, rabbit polyclonal, MyBioSource, MBS9601451), anti-VGLUT3  
1139 (1:500, guinea pig polyclonal, Synaptic Systems, 135-204), anti-RFP (1:500, rat  
1140 monoclonal, Chromotek, 5f8-100), anti-Doublecortin (1:1000, goat polyclonal,  
1141 Santa Cruz, SC-8066), and anti-Ki-67(1:1000, rat monoclonal, Invitrogen, 14-  
1142 5698-80). For fluorescent detection, sections were washed in PBS-T and  
1143 incubated with species matched secondary antibodies- Alexa Fluor 488 (donkey  
1144 anti-chicken, Jackson, 703-545-155), Alexa Fluor 546 (donkey anti-rabbit,  
1145 Invitrogen, A10040), Alexa Fluor 647 (donkey anti-goat, Invitrogen, A21447 or  
1146 donkey anti-mouse, Jackson, 715-605-151), and Cy5 (donkey anti-guinea pig,  
1147 Jackson, 706-175-148)- at 1:500 dilution for two hours. Sections were washed in  
1148 PBS and 1:3000 DAPI before rinsing and mounting onto slides.

## 1149 **Confocal and fluorescent microscopy and quantification**

1150 Overview images: Overview images of intersectional subtypes were acquired  
1151 using a 5x objective on a Zeiss Axioplan2 fluorescence microscope equipped  
1152 with an AxioCam digital camera and Axiovision software using 1x1 binning.  
1153 Images were then cropped to a 1000x1000 pixel square containing the dorsal  
1154 raphe. Images showing the distribution of PAX5, SATB2, and NR2F2 are 2x2

1155 tiled maximum intensity images acquired using a Plan Apo  $\lambda$  20x/0.75 DIC I  
1156 objective on a spinning disk confocal. Images showing TPH2 and VGLUT3  
1157 staining are a single optical slice taken on a spinning disk confocal using a Plan  
1158 Apo  $\lambda$  20x/0.75 DIC I objective or Plan Fluor 40x/1.3 Oil DIC H/N2 objective  
1159 respectively. Images were cropped to create a zoomed image of the region of  
1160 interest.

1161 Quantification: Quantification of PAX5, NR2F2, and SATB2 was completed in  
1162 *Vglut3::IRES-cre; Pet1::Flpe; hM3Dq* animals, where cells expressing both  
1163 *Vglut3::IRES-cre* and *Pet1::Flpe* express an hM3Dq-mCherry fusion and all other  
1164 *Pet1*<sup>+</sup> cells express eGFP. Images were acquired as 2x2 tiles as a z-stack  
1165 (0.9um step) using a Plan Apo  $\lambda$  20x/0.75 DIC I objective on a spinning disk  
1166 confocal and cropped into equally sized non-overlapping subregions (1000x1000  
1167 pixel) spanning the rostral to caudal extent of the dorsal raphe. Cells were  
1168 counted positive if antibody staining for the protein of interest overlapped with  
1169 DAPI staining and was within a DsRed + cell (*Vglut3::cre;Pet1::Flpe* lineage) or a  
1170 GFP+ cell (subtractive *Pet1* lineage). All counts were completed in images taken  
1171 from 2 to 4 animals depending on the brain region. Images used for the  
1172 quantification of VGLUT3 antibody staining were acquired using a Plan Fluor  
1173 40x/1.3 Oil DIC H/N2 objective on a spinning disk confocal on non-overlapping  
1174 anatomical subdivisions of the dorsal raphe. Cells were counted positive based  
1175 on the overlap of VGLUT3 antibody staining with mCherry  
1176 (*VGlut3::cre;Pet1::Flpe* lineage) or a eGFP (subtractive *Pet1* lineage) staining. In  
1177 the case of TPH2 quantification, *En1::cre; Pet1::Flpe; FrePe* animals were used  
1178 (eGFP+ *En1::cre; Pet1::Flpe* intersectional lineage cells). Images were acquired  
1179 as 2x2 tiles as a z-stack (0.9um step) using a Plan Apo  $\lambda$  20x/0.75 DIC I  
1180 objective on a spinning disk confocal and cropped into equally sized non-  
1181 overlapping subregions (1000x1000 pixel) spanning the rostral to caudal extent  
1182 of the dorsal raphe. Cells were counted positive based on colocalization of TPH2  
1183 antibody staining with eGFP. All quantification was performed by an experienced



1184 observer blinded to the anatomical region of the image in a minimum of two  
1185 animals per region.

1186 Flat mount of lateral wall of lateral ventricle: *P2ry1::IRES-cre; Pet1::Flpe; Ai65*  
1187 mice (n=4) were transcardially perfused with cold PBS. Lateral wall dissection  
1188 was completed as described in Mirzadeh, et.al, 2010. Briefly, brains were  
1189 dissected into PBS and split into two hemispheres. The hippocampus was  
1190 removed, exposing the lateral wall, and the brain was fixed overnight in 4% PFA  
1191 in PBS. The remainder of the microdissection of the lateral wall was then  
1192 completed and immediately proceeded to immunohistochemistry as described  
1193 above.

#### 1194 **Single-cell sorting and RNA sequencing**

1195 OnChip Sorting, 10X library preparation, and RNA sequencing: Data was derived  
1196 from two different experiments composed of brain tissue harvested from  
1197 *En1::cre; Pet1::Flpe; FrePe* mice (n=4) or *Pet1::Flpe; RC::FL-hM3Dq* mice (n=6).  
1198 Tissue was sectioned on a vibratome and protease-digested in ACSF containing  
1199 activity blockers as described in (Hempel et al., 2007). The dorsal raphe was  
1200 micro-dissected under an upright dissection microscope with fluorescence optics  
1201 and all tissue was combined in a 1.5mL Eppendorf tube containing 500ul of  
1202 filtered ACSF/1%FBS. Tissue was then gently triturated using glass  
1203 micropipettes of decreasing diameter until achieving a mostly homogeneous  
1204 single-cell suspension without visible tissue chunks. One drop of NucBlue  
1205 (Thermo Fisher Scientific) was added to the cell suspension and allowed to sit for  
1206 20 minutes (to aid in sorting and cell quantification). The cell suspension was  
1207 then loaded onto a microfluidic chip and eGFP-marked, NucBlue-positive cells  
1208 were sorted using an OnChip sorter (OnChip Biotechnologies Co.). Final cell  
1209 concentration was determined by counting the number of cells in 10ul of the  
1210 sorted output using a hemacytometer. Cells were then run through the 10X  
1211 Genomics Chromium Single Cell 3' v3 protocol, and libraries were sequenced on  
1212 an Illumina NextSeq 500 sequencer to a mean depth of ~115,000 reads per cell.

1213 Manual Sorting and RNA sequencing: Brain tissue was harvested from triple  
1214 transgenic animals – *Sert::cre;Pet1::Flpe;FrePe, Npy2r::IRES-cre*  
1215 *Pet1::Flpe;FrePe, Crh::cre;Pet1::Flpe;FrePe, and P2ry1::IRES-cre* (p60-p120, a  
1216 minimum of two mice per condition) and fluorescently labeled cells were sorted  
1217 as described in (Okaty et al., 2015). Briefly, the brainstem was sectioned into  
1218 400um coronal sections using a vibratome. Sections were bubbled in artificial  
1219 cerebrospinal fluid (ACSF) containing activity blockers for at least 5 minutes  
1220 before being transferred to ACSF containing 1mg/ml pronase for 1 hour. Slices  
1221 were then returned to protease-free ACSF for 15 minutes, before regions of  
1222 interest were micro-dissected. Anatomical subdivisions of the dorsal raphe were  
1223 made based on the shape of the dorsal raphe and landmarks including fiber  
1224 tracts and the aqueduct (as indicated in **Figure 4A**). Dissected chunks of tissue  
1225 were transferred first to a clean 35-mm dish containing ACSF and then to a  
1226 1.5mL Eppendorf tube containing 1mL of filtered ACSF/1% FBS. Tissue was  
1227 then gently triturated until without visible chunks. Dissociated cells were diluted  
1228 and poured into a Petri dish. Fluorescently marked cells were aspirated using  
1229 mouth aspiration and moved into 3 consecutive wash dishes. Each cell was then  
1230 aspirated a final time and deposited into an individual 0.5mL tube containing  
1231 9.5ul of nuclease-free water and 1ul of 10x Reaction Buffer (Smart-Seq V4 Ultra  
1232 Low Input RNA kit, Takara Bio) and allowed to incubate at room temperature for  
1233 5 minutes before being stored at -80deg until cDNA synthesis. Single cells were  
1234 converted to cDNA and amplified using Smart-Seq V4 Ultra Low Input RNA Kit  
1235 (Takara Bio). The cDNA output was then processed with Nextera XT DNA  
1236 Library Preparation Kit. Quantification and quality control were assessed with  
1237 TapeStation. Libraries were then sequenced on either an Illumina HiSeq 2500  
1238 (50 base-pair, single-end) or NextSeq 500 (75-bp, paired-end) to a mean depth  
1239 of ~4,000,000 reads per cell.

#### 1240 **scRNA-seq Analysis**

1241 10x scRNA-seq data: Transcriptome mapping (using the mm10 genome  
1242 assembly) and demultiplexing were performed using the 10X Genomics Cell

1243 Ranger software (version 3.0.2). Several data-filtering steps were performed on  
1244 the matrix of transcript counts (using R version 3.5.3) prior to further analysis.  
1245 First, we filtered out all genes detected in fewer than ten single-cell libraries, and  
1246 filtered out all libraries with less than 4,500 detected genes. This threshold was  
1247 selected based on the histogram of gene detection for all single-cell libraries as  
1248 initially called by the Cell Ranger cell detection algorithm, which appeared to  
1249 reflect two different distributions corresponding to low-complexity versus high-  
1250 complexity libraries. The low-complexity distribution was right-skewed and had a  
1251 mode of less than 1,000 detected genes, whereas the high-complexity  
1252 distribution was left-skewed and had a mode of ~7,500 detected genes. 4,500  
1253 genes was roughly the boundary between the two distributions; i.e. the minima  
1254 between the two modes, and also corresponded to a sharp inflection point in the  
1255 Barcodes versus UMI counts plot in the web\_summary.html file generated by  
1256 Cell Ranger. While many of these low-complexity libraries may have been  
1257 misidentified as cells by Cell Ranger (e.g. droplets containing transcripts from  
1258 lysed cells, rather than intact cells) examination of genes enriched in lower-  
1259 complexity libraries suggested that some of them reflected unhealthy cells (e.g.  
1260 libraries with high mitochondrial gene expression) or contaminating non-neuronal  
1261 cells (e.g. libraries enriched for glial marker genes). Notably, the number of cells  
1262 with high-complexity libraries corresponded well with our estimated number of  
1263 eGFP positive cells used as input to the 10X chip. We further excluded libraries  
1264 with: (1) evidence of glial contamination, based on high-outlier expression of glial  
1265 marker genes, including *Plp1*, *Olig1*, and *Aqp4*, (2) absence or low-outlier levels  
1266 of *Pet1/Fev* transcripts, (3) greater than fifteen percent of detected genes  
1267 corresponding with mitochondrial genes, (4) less than two percent of detected  
1268 genes corresponding with ribosomal genes (these appeared to be single-nuclei  
1269 libraries, rather than single-cell), (5) high-outlier UMI counts, and (6) high-outlier  
1270 gene detection. 2,350 single-cell libraries and 17,231 genes passed the above  
1271 filtering criteria.

1272 Next, we created a Seurat object using these filtered data (Seurat version 3.0.2).  
1273 Data were log-normalized using the NormalizeData function (using the default  
1274 scale factor of 1e4), and we identified the top two thousand genes (or in some  
1275 cases non-coding RNAs) with the most highly variable transcript expression  
1276 across single cells using the FindVariableFeatures function (selection.method =  
1277 “vst”, nfeatures=2000). We then scaled and centered the log-normalized data  
1278 using the ScaleData function and carried out principal components analysis  
1279 (PCA) on the scaled expression values of the two thousand most highly variable  
1280 genes. This allowed us to reduce the dimensionality of the data onto a smaller  
1281 set of composite variables representing the most salient gene expression  
1282 differences across single neurons. The procedure for identifying meaningful *Pet1*  
1283 neuron subtype clusters is thoroughly described in the Results section of the  
1284 main text. Briefly, we systematically varied the number of principal components  
1285 included and the resolution parameter in the functions FindNeighbors,  
1286 FindClusters, and RunUMAP, Dendrograms were created using BuildClusterTree  
1287 and PlotClusterTree, and cluster-enriched genes were identified using the  
1288 FindAllMarkers function, with min.pct = 0.25 and logfc.threshold = 0.25, using  
1289 Wilcoxon Rank Sum tests.

1290 Manual scRNA-seq data: Transcript mapping to the mm10 genome assembly  
1291 and feature counts were performed using STAR (version 2.5.4) (Dobin and  
1292 Gingeras, 2016). Given the high purity of manual cell sorting and the high  
1293 sensitivity of SMART-Seq v4 cDNA amplification, no data filtering was required;  
1294 i.e. single-cell libraries showed no evidence for off-target contamination and  
1295 showed consistently high gene detection (~9,000 genes per single-cell). Counts  
1296 data were analyzed using Seurat as described for 10X scRNA-seq data.

1297 Transfer of 10X cell type labels: In order to explore the correspondence between  
1298 the fourteen 10X scRNA-seq data-defined *Pet1* neuron subtypes and other  
1299 scRNA-seq data, including our manual scRNA-seq data, and the Huang, et al.  
1300 2019 and Ren, et al. 2019 datasets, we employed the strategy outlined in (Stuart  
1301 et al., 2019). Specifically, we used the Seurat functions FindTransferAnchors and

1302 TransferData, using the 10X data as the “reference” and the other datasets as  
1303 the “query” group.

### 1304 **Electrophysiology methods**

1305 *In vitro* brainstem slice preparations containing dorsal raphe serotonin neurons  
1306 were obtained from 4-5 week old mice. After isoflurane anesthesia, mice were  
1307 perfused transcardially with a solution of artificial CSF (NaHCO<sub>3</sub>-aCSF)  
1308 containing the following (in mM): 124 NaCl, 25 NaHCO<sub>3</sub>, 3 KCl, 2 CaCl<sub>2</sub>, 2  
1309 MgCl<sub>2</sub>, 1.2, NaH<sub>2</sub>PO<sub>4</sub> and 25 d-Glucose, equilibrated with 95% O<sub>2</sub> and 5% CO<sub>2</sub>  
1310 adjusted to 310 ± 5 mOsm/L. The brainstem was dissected and mounted on the  
1311 stage of a VT1200S vibratome while immersed in an ice slush solution aCSF  
1312 containing the following (in mM): NMDG 93, HCl 93, KCl 2.5, NaH<sub>2</sub>PO<sub>4</sub> 1.2,  
1313 NaHCO<sub>3</sub> 30, HEPES 20, d-Glucose 25, Na-Ascorbate 5, Thiourea 2, Na-  
1314 Pyruvate 3, MgSO<sub>4</sub> 10, CaCl<sub>2</sub> 0.5 equilibrated with 95% O<sub>2</sub> and 5% CO<sub>2</sub>  
1315 adjusted to 310 ± 5 mOsm/L. Coronal slices 200 µm thick containing the dorsal  
1316 nucleus raphe were recovered for 1h at 35-6 C in HEPES-aCSF containing: NaCl  
1317 92, KCl 2.5, NaH<sub>2</sub>PO<sub>4</sub> 1.2, NaHCO<sub>3</sub> 30, HEPES 20, Glucose 25, Na-Ascorbate 5,  
1318 Thiourea 2, NaPyruvate 3, MgSO<sub>4</sub> 10, CaCl<sub>2</sub> 0.5 equilibrated with 95% O<sub>2</sub> and  
1319 5% CO<sub>2</sub> adjusted to 310 ± 5 mOsm/L and placed at room temperature for  
1320 storage. Individual slices were transferred to the recording chamber and  
1321 superfused with NaHCO<sub>3</sub>-aCSF at 34°C. Electrodes (5–7 MΩ) were pulled from  
1322 borosilicate glass. Pipettes were filled with (in mM): 140 K-gluconate, HEPES 10,  
1323 KCl 5, Na-ATP 2, MgCl<sub>2</sub> 2, EGTA 0.02, biocytin 0.1% Na<sub>2</sub>GTP 0.5, Na<sub>2</sub>-  
1324 phosphocreatine 4, pH 7.4 adjusted with KOH and adjusted to 285 ± 5 mOsm/L  
1325 with sucrose. Somatic whole-cell recordings were obtained with a Multiclamp  
1326 700B amplifier, signals were acquired and sampled at 100 kHz using Digidata  
1327 1440A digitizing board. Pipette capacitance was compensated ≈70% in current  
1328 clamp (CC). Series resistance (*R<sub>s</sub>*) was typically 9–15 MΩ. Cells with *R<sub>s</sub>* > 15  
1329 MΩ were discarded. A measured liquid junction potential of ≈10 mV was  
1330 corrected online. Cells were held at *V<sub>h</sub>*= -80 mV unless otherwise indicated. To  
1331 create action potential frequency-current curves, a protocol that applies a series

1332 of 750 ms current pulses ranging from -100 pA to 220 pA was created  
1333 using Molecular Devices Clampex 10.7 software running on Windows 7.

### 1334 **Acknowledgments**

1335 The authors thank the Biopolymers Facility at HMS for assistance with next-  
1336 generation sequencing; the Microscopy Resources on the North Quad (MicRoN)  
1337 core at Harvard Medical School for microscope use; Steve Liberles for providing  
1338 *Npy2r::IRES-cre* and *P2ry1::IRES-cre* driver lines; ChangHee Lee and Jin Akagi  
1339 for advice with On-Chip sorting; the Dymecki lab for discussions and thoughtful  
1340 comments on this manuscript; J.J Mai for reagents and animal husbandry.  
1341 Grants supporting this work include NARSAD Young Investigator Grant (BWO,  
1342 SMD), NIDA Grant RO1DA034022 (BWO,SMD), T32 HL 007901 (NS), and the  
1343 GVR Khodadad Fund for the Study of Genetic, Neurobiological, and  
1344 Physiochemical Processes of EPS (BWO,SMD).

### 1345 **References**

- 1346 Abrams, J.K., Johnson, P.L., Hollis, J.H., and Lowry, C.A. (2004). Anatomic and  
1347 functional topography of the dorsal raphe nucleus. *Ann N Y Acad Sci* 1018, 46-  
1348 57.
- 1349 Aghajanian, G.K., and Gallager, D.W. (1975). Raphe origin of serotonergic  
1350 nerves terminating in the cerebral ventricles. *Brain Res* 88, 221-231.
- 1351 Alfonso, J., Penkert, H., Duman, C., Zuccotti, A., and Monyer, H. (2015).  
1352 Downregulation of Sphingosine 1-Phosphate Receptor 1 Promotes the Switch  
1353 from Tangential to Radial Migration in the OB. *J Neurosci* 35, 13659-13672.
- 1354 Alonso, A., Merchan, P., Sandoval, J.E., Sanchez-Arrones, L., Garcia-Cazorla,  
1355 A., Artuch, R., Ferran, J.L., Martinez-de-la-Torre, M., and Puelles, L. (2013).  
1356 Development of the serotonergic cells in murine raphe nuclei and their relations  
1357 with rhombomeric domains. *Brain Struct Funct* 218, 1229-1277.
- 1358 Amilhon, B., Lopicard, E., Renoir, T., Mongeau, R., Popa, D., Poirel, O., Miot, S.,  
1359 Gras, C., Gardier, A.M., Gallego, J., *et al.* (2010). VGLUT3 (vesicular glutamate  
1360 transporter type 3) contribution to the regulation of serotonergic transmission and  
1361 anxiety. *J Neurosci* 30, 2198-2210.

- 1362 Andrade, R., and Haj-Dahmane, S. (2013). Serotonin neuron diversity in the  
1363 dorsal raphe. *ACS Chem Neurosci* 4, 22-25.
- 1364 Asano, M., and Gruss, P. (1992). Pax-5 is expressed at the midbrain-hindbrain  
1365 boundary during mouse development. *Mech Dev* 39, 29-39.
- 1366 Azmitia, E.C., and Segal, M. (1978). An autoradiographic analysis of the  
1367 differential ascending projections of the dorsal and median raphe nuclei in the  
1368 rat. *J Comp Neurol* 179, 641-667.
- 1369 Baker, K.G., Halliday, G.M., Halasz, P., Hornung, J.P., Geffen, L.B., Cotton,  
1370 R.G., and Tork, I. (1991a). Cytoarchitecture of serotonin-synthesizing neurons in  
1371 the pontine tegmentum of the human brain. *Synapse* 7, 301-320.
- 1372 Baker, K.G., Halliday, G.M., Hornung, J.P., Geffen, L.B., Cotton, R.G., and Tork,  
1373 I. (1991b). Distribution, morphology and number of monoamine-synthesizing and  
1374 substance P-containing neurons in the human dorsal raphe nucleus.  
1375 *Neuroscience* 42, 757-775.
- 1376 Baker, K.G., Halliday, G.M., and Tork, I. (1990). Cytoarchitecture of the human  
1377 dorsal raphe nucleus. *J Comp Neurol* 301, 147-161.
- 1378 Bakken, T.E., Hodge, R.D., Miller, J.A., Yao, Z., Nguyen, T.N., Aevermann, B.,  
1379 Barkan, E., Bertagnolli, D., Casper, T., Dee, N., *et al.* (2018). Single-nucleus and  
1380 single-cell transcriptomes compared in matched cortical cell types. *PLoS One* 13,  
1381 e0209648.
- 1382 Banasr, M., Hery, M., Printemps, R., and Daszuta, A. (2004). Serotonin-induced  
1383 increases in adult cell proliferation and neurogenesis are mediated through  
1384 different and common 5-HT receptor subtypes in the dentate gyrus and the  
1385 subventricular zone. *Neuropsychopharmacology* 29, 450-460.
- 1386 Bang, S.J., and Commons, K.G. (2012). Forebrain GABAergic projections from  
1387 the dorsal raphe nucleus identified by using GAD67-GFP knock-in mice. *J Comp*  
1388 *Neurol* 520, 4157-4167.
- 1389 Bang, S.J., Jensen, P., Dymecki, S.M., and Commons, K.G. (2012). Projections  
1390 and interconnections of genetically defined serotonin neurons in mice. *Eur J*  
1391 *Neurosci* 35, 85-96.
- 1392 Barrett, K.T., Dosumu-Johnson, R.T., Daubenspeck, J.A., Brust, R.D., Kreouzis,  
1393 V., Kim, J.C., Li, A., Dymecki, S.M., and Nattie, E.E. (2016). Partial Raphe  
1394 Dysfunction in Neurotransmission Is Sufficient to Increase Mortality after Anoxic  
1395 Exposures in Mice at a Critical Period in Postnatal Development. *J Neurosci* 36,  
1396 3943-3953.

- 1397 Beaudet, A., and Descarries, L. (1976). Quantitative data on serotonin nerve  
1398 terminals in adult rat neocortex. *Brain Res* 111, 301-309.
- 1399 Bellido, I., Hansson, A.C., Gomez-Luque, A.J., Andbjør, B., Agnati, L.F., and  
1400 Fuxe, K. (2004). Corticosterone strongly increases the affinity of dorsal raphe 5-  
1401 HT1A receptors. *Neuroreport* 15, 1457-1459.
- 1402 Brezun, J.M., and Daszuta, A. (1999). Depletion in serotonin decreases  
1403 neurogenesis in the dentate gyrus and the subventricular zone of adult rats.  
1404 *Neuroscience* 89, 999-1002.
- 1405 Bruchas, M.R., Land, B.B., and Chavkin, C. (2010). The dynorphin/kappa opioid  
1406 system as a modulator of stress-induced and pro-addictive behaviors. *Brain Res*  
1407 1314, 44-55.
- 1408 Brust, R.D., Corcoran, A.E., Richerson, G.B., Nattie, E., and Dymecki, S.M.  
1409 (2014). Functional and developmental identification of a molecular subtype of  
1410 brain serotonergic neuron specialized to regulate breathing dynamics. *Cell Rep*  
1411 9, 2152-2165.
- 1412 Butler, A., Hoffman, P., Smibert, P., Papalexi, E., and Satija, R. (2018).  
1413 Integrating single-cell transcriptomic data across different conditions,  
1414 technologies, and species. *Nat Biotechnol* 36, 411-420.
- 1415 Calizo, L.H., Akanwa, A., Ma, X., Pan, Y.Z., Lemos, J.C., Craige, C., Heemstra,  
1416 L.A., and Beck, S.G. (2011). Raphe serotonin neurons are not homogenous:  
1417 electrophysiological, morphological and neurochemical evidence.  
1418 *Neuropharmacology* 61, 524-543.
- 1419 Campbell, J.N., Macosko, E.Z., Fenselau, H., Pers, T.H., Lyubetskaya, A.,  
1420 Tenen, D., Goldman, M., Verstegen, A.M., Resch, J.M., McCarroll, S.A., *et al.*  
1421 (2017). A molecular census of arcuate hypothalamus and median eminence cell  
1422 types. *Nat Neurosci* 20, 484-496.
- 1423 Celada, P., Puig, M.V., Casanovas, J.M., Guillazo, G., and Artigas, F. (2001).  
1424 Control of dorsal raphe serotonergic neurons by the medial prefrontal cortex:  
1425 Involvement of serotonin-1A, GABA(A), and glutamate receptors. *J Neurosci* 21,  
1426 9917-9929.
- 1427 Challis, C., Boulden, J., Veerakumar, A., Espallergues, J., Vassoler, F.M., Pierce,  
1428 R.C., Beck, S.G., and Berton, O. (2013). Raphe GABAergic neurons mediate the  
1429 acquisition of avoidance after social defeat. *J Neurosci* 33, 13978-13988,  
1430 13988a.



- 1431 Chang, R.B., Strohlic, D.E., Williams, E.K., Umans, B.D., and Liberles, S.D.  
1432 (2015). Vagal Sensory Neuron Subtypes that Differentially Control Breathing.  
1433 Cell 161, 622-633.
- 1434 Chavkin, C., James, I.F., and Goldstein, A. (1982). Dynorphin is a specific  
1435 endogenous ligand of the kappa opioid receptor. Science 215, 413-415.
- 1436 Chen, C.H., Battaglioli, G., Martin, D.L., Hobart, S.A., and Colon, W. (2003).  
1437 Distinctive interactions in the holoenzyme formation for two isoforms of glutamate  
1438 decarboxylase. Biochim Biophys Acta 1645, 63-71.
- 1439 Chen, C.P., Eastwood, S.L., Hope, T., McDonald, B., Francis, P.T., and Esiri,  
1440 M.M. (2000). Immunocytochemical study of the dorsal and median raphe nuclei  
1441 in patients with Alzheimer's disease prospectively assessed for behavioural  
1442 changes. Neuropathol Appl Neurobiol 26, 347-355.
- 1443 Commons, K.G. (2009). Locally collateralizing glutamate neurons in the dorsal  
1444 raphe nucleus responsive to substance P contain vesicular glutamate transporter  
1445 3 (VGLUT3). J Chem Neuroanat 38, 273-281.
- 1446 Commons, K.G. (2015). Two major network domains in the dorsal raphe nucleus.  
1447 J Comp Neurol 523, 1488-1504.
- 1448 Commons, K.G. (2016). Ascending serotonin neuron diversity under two  
1449 umbrellas. Brain Struct Funct 221, 3347-3360.
- 1450 Condomitti, G., and de Wit, J. (2018). Heparan Sulfate Proteoglycans as  
1451 Emerging Players in Synaptic Specificity. Front Mol Neurosci 11, 14.
- 1452 Crawford, L.K., Craige, C.P., and Beck, S.G. (2010). Increased intrinsic  
1453 excitability of lateral wing serotonin neurons of the dorsal raphe: a mechanism for  
1454 selective activation in stress circuits. J Neurophysiol 103, 2652-2663.
- 1455 Dahlstroem, A., and Fuxe, K. (1964). Evidence for the Existence of Monoamine-  
1456 Containing Neurons in the Central Nervous System. I. Demonstration of  
1457 Monoamines in the Cell Bodies of Brain Stem Neurons. Acta Physiol Scand  
1458 Suppl, SUPPL 232:231-255.
- 1459 Dengler-Crish, C.M., Smith, M.A., and Wilson, G.N. (2017). Early Evidence of  
1460 Low Bone Density and Decreased Serotonergic Synthesis in the Dorsal Raphe of  
1461 a Tauopathy Model of Alzheimer's Disease. J Alzheimers Dis 55, 1605-1619.
- 1462 Di Donato, V., De Santis, F., Albadri, S., Auer, T.O., Duroure, K., Charpentier,  
1463 M., Concordet, J.P., Gebhardt, C., and Del Bene, F. (2018). An Attractive Reelin  
1464 Gradient Establishes Synaptic Lamination in the Vertebrate Visual System.  
1465 Neuron 97, 1049-1062 e1046.

- 1466 Dobin, A., and Gingeras, T.R. (2016). Optimizing RNA-Seq Mapping with STAR.  
1467 *Methods Mol Biol* 1415, 245-262.
- 1468 Dymecki, S.M., Ray, R.S., and Kim, J.C. (2010). Mapping cell fate and function  
1469 using recombinase-based intersectional strategies. *Methods Enzymol* 477, 183-  
1470 213.
- 1471 El Mestikawy, S., Wallen-Mackenzie, A., Fortin, G.M., Descarries, L., and  
1472 Trudeau, L.E. (2011). From glutamate co-release to vesicular synergy: vesicular  
1473 glutamate transporters. *Nat Rev Neurosci* 12, 204-216.
- 1474 Ellegood, J., Nakai, N., Nakatani, J., Henkelman, M., Takumi, T., and Lerch, J.  
1475 (2015). Neuroanatomical Phenotypes Are Consistent With Autism-Like  
1476 Behavioral Phenotypes in the 15q11-13 Duplication Mouse Model. *Autism Res* 8,  
1477 545-555.
- 1478 Erbel-Sieler, C., Dudley, C., Zhou, Y., Wu, X., Estill, S.J., Han, T., Diaz-Arrastia,  
1479 R., Brunskill, E.W., Potter, S.S., and McKnight, S.L. (2004). Behavioral and  
1480 regulatory abnormalities in mice deficient in the NPAS1 and NPAS3 transcription  
1481 factors. *Proc Natl Acad Sci U S A* 101, 13648-13653.
- 1482 Erickson, J.D., Eiden, L.E., and Hoffman, B.J. (1992). Expression cloning of a  
1483 reserpine-sensitive vesicular monoamine transporter. *Proc Natl Acad Sci U S A*  
1484 89, 10993-10997.
- 1485 Erlander, M.G., Tillakaratne, N.J., Feldblum, S., Patel, N., and Tobin, A.J. (1991).  
1486 Two genes encode distinct glutamate decarboxylases. *Neuron* 7, 91-100.
- 1487 Evrard, A., Barden, N., Hamon, M., and Adrien, J. (2006). Glucocorticoid  
1488 receptor-dependent desensitization of 5-HT<sub>1A</sub> autoreceptors by sleep  
1489 deprivation: studies in GR-*i* transgenic mice. *Sleep* 29, 31-36.
- 1490 Fernandez, S.P., Cauli, B., Cabezas, C., Muzerelle, A., Poncer, J.C., and  
1491 Gaspar, P. (2016). Multiscale single-cell analysis reveals unique phenotypes of  
1492 raphe 5-HT neurons projecting to the forebrain. *Brain Struct Funct* 221, 4007-  
1493 4025.
- 1494 Fox, S.R., and Deneris, E.S. (2012). Engrailed is required in maturing serotonin  
1495 neurons to regulate the cytoarchitecture and survival of the dorsal raphe nucleus.  
1496 *J Neurosci* 32, 7832-7842.
- 1497 Fremeau, R.T., Jr., Burman, J., Qureshi, T., Tran, C.H., Proctor, J., Johnson, J.,  
1498 Zhang, H., Sulzer, D., Copenhagen, D.R., Storm-Mathisen, J., *et al.* (2002). The  
1499 identification of vesicular glutamate transporter 3 suggests novel modes of  
1500 signaling by glutamate. *Proc Natl Acad Sci U S A* 99, 14488-14493.

- 1501 Fu, W., Le Maitre, E., Fabre, V., Bernard, J.F., David Xu, Z.Q., and Hokfelt, T.  
1502 (2010). Chemical neuroanatomy of the dorsal raphe nucleus and adjacent  
1503 structures of the mouse brain. *J Comp Neurol* 518, 3464-3494.
- 1504 Funahashi, J., Okafuji, T., Ohuchi, H., Noji, S., Tanaka, H., and Nakamura, H.  
1505 (1999). Role of Pax-5 in the regulation of a mid-hindbrain organizer's activity. *Dev*  
1506 *Growth Differ* 41, 59-72.
- 1507 Fyodorov, D., Nelson, T., and Deneris, E. (1998). Pet-1, a novel ETS domain  
1508 factor that can activate neuronal nAChR gene transcription. *J Neurobiol* 34, 151-  
1509 163.
- 1510 Gagnon, D., and Parent, M. (2014). Distribution of VGLUT3 in highly  
1511 collateralized axons from the rat dorsal raphe nucleus as revealed by single-  
1512 neuron reconstructions. *PLoS One* 9, e87709.
- 1513 Gaspar, P., and Lillesaar, C. (2012). Probing the diversity of serotonin neurons.  
1514 *Philos Trans R Soc Lond B Biol Sci* 367, 2382-2394.
- 1515 Goncalves, L., Nogueira, M.I., Shammah-Lagnado, S.J., and Metzger, M. (2009).  
1516 Prefrontal afferents to the dorsal raphe nucleus in the rat. *Brain Res Bull* 78, 240-  
1517 247.
- 1518 Gong, S., Doughty, M., Harbaugh, C.R., Cummins, A., Hatten, M.E., Heintz, N.,  
1519 and Gerfen, C.R. (2007). Targeting Cre recombinase to specific neuron  
1520 populations with bacterial artificial chromosome constructs. *J Neurosci* 27, 9817-  
1521 9823.
- 1522 Gras, C., Herzog, E., Bellenchi, G.C., Bernard, V., Ravassard, P., Pohl, M.,  
1523 Gasnier, B., Giros, B., and El Mestikawy, S. (2002). A third vesicular glutamate  
1524 transporter expressed by cholinergic and serotonergic neurons. *J Neurosci* 22,  
1525 5442-5451.
- 1526 Guo, Y.P., and Commons, K.G. (2017). Serotonin neuron abnormalities in the  
1527 BTBR mouse model of autism. *Autism Res* 10, 66-77.
- 1528 Hale, M.W., and Lowry, C.A. (2011). Functional topography of midbrain and  
1529 pontine serotonergic systems: implications for synaptic regulation of serotonergic  
1530 circuits. *Psychopharmacology (Berl)* 213, 243-264.
- 1531 Harburg, G.C., Hall, F.S., Harrist, A.V., Sora, I., Uhl, G.R., and Eisch, A.J. (2007).  
1532 Knockout of the mu opioid receptor enhances the survival of adult-generated  
1533 hippocampal granule cell neurons. *Neuroscience* 144, 77-87.

- 1534 Hempel, C.M., Sugino, K., and Nelson, S.B. (2007). A manual method for the  
1535 purification of fluorescently labeled neurons from the mammalian brain. *Nat*  
1536 *Protoc* 2, 2924-2929.
- 1537 Hendricks, T., Francis, N., Fyodorov, D., and Deneris, E.S. (1999). The ETS  
1538 domain factor Pet-1 is an early and precise marker of central serotonin neurons  
1539 and interacts with a conserved element in serotonergic genes. *J Neurosci* 19,  
1540 10348-10356.
- 1541 Hendricks, T.J., Fyodorov, D.V., Wegman, L.J., Lelutiu, N.B., Pehek, E.A.,  
1542 Yamamoto, B., Silver, J., Weeber, E.J., Sweatt, J.D., and Deneris, E.S. (2003).  
1543 Pet-1 ETS gene plays a critical role in 5-HT neuron development and is required  
1544 for normal anxiety-like and aggressive behavior. *Neuron* 37, 233-247.
- 1545 Hennessy, M.L., Corcoran, A.E., Brust, R.D., Chang, Y., Nattie, E.E., and  
1546 Dymecki, S.M. (2017). Activity of Tachykinin1-Expressing Pet1 Raphe Neurons  
1547 Modulates the Respiratory Chemoreflex. *J Neurosci* 37, 1807-1819.
- 1548 Herzog, E., Gilchrist, J., Gras, C., Muzerelle, A., Ravassard, P., Giros, B.,  
1549 Gaspar, P., and El Mestikawy, S. (2004). Localization of VGLUT3, the vesicular  
1550 glutamate transporter type 3, in the rat brain. *Neuroscience* 123, 983-1002.
- 1551 Hioki, H., Fujiyama, F., Nakamura, K., Wu, S.X., Matsuda, W., and Kaneko, T.  
1552 (2004). Chemically specific circuit composed of vesicular glutamate transporter  
1553 3- and preprotachykinin B-producing interneurons in the rat neocortex. *Cereb*  
1554 *Cortex* 14, 1266-1275.
- 1555 Hioki, H., Nakamura, H., Ma, Y.F., Konno, M., Hayakawa, T., Nakamura, K.C.,  
1556 Fujiyama, F., and Kaneko, T. (2010). Vesicular glutamate transporter 3-  
1557 expressing nonserotonergic projection neurons constitute a subregion in the rat  
1558 midbrain raphe nuclei. *J Comp Neurol* 518, 668-686.
- 1559 Hitoshi, S., Maruta, N., Higashi, M., Kumar, A., Kato, N., and Ikenaka, K. (2007).  
1560 Antidepressant drugs reverse the loss of adult neural stem cells following chronic  
1561 stress. *J Neurosci Res* 85, 3574-3585.
- 1562 Hodge, R.D., Bakken, T.E., Miller, J.A., Smith, K.A., Barkan, E.R., Graybuck,  
1563 L.T., Close, J.L., Long, B., Johansen, N., Penn, O., *et al.* (2019). Conserved cell  
1564 types with divergent features in human versus mouse cortex. *Nature* 573, 61-68.
- 1565 Hoffman, B.J., Mezey, E., and Brownstein, M.J. (1991). Cloning of a serotonin  
1566 transporter affected by antidepressants. *Science* 254, 579-580.
- 1567 Huang, K.W., Ochandarena, N.E., Philson, A.C., Hyun, M., Birnbaum, J.E.,  
1568 Cicconet, M., and Sabatini, B.L. (2019). Molecular and anatomical organization of  
1569 the dorsal raphe nucleus. *Elife* 8.

- 1570 Ishimura, K., Takeuchi, Y., Fujiwara, K., Tominaga, M., Yoshioka, H., and  
1571 Sawada, T. (1988). Quantitative analysis of the distribution of serotonin-  
1572 immunoreactive cell bodies in the mouse brain. *Neurosci Lett* 91, 265-270.
- 1573 Iyer, A., Kmiecik, T.E., Park, M., Daar, I., Blair, D., Dunn, K.J., Sutrave, P., Ihle,  
1574 J.N., Bodescot, M., and Vande Woude, G.F. (1990). Structure, tissue-specific  
1575 expression, and transforming activity of the mouse met protooncogene. *Cell*  
1576 *Growth Differ* 1, 87-95.
- 1577 Jacobs, B.L., and Azmitia, E.C. (1992). Structure and function of the brain  
1578 serotonin system. *Physiol Rev* 72, 165-229.
- 1579 Jensen, P., Farago, A.F., Awatramani, R.B., Scott, M.M., Deneris, E.S., and  
1580 Dymecki, S.M. (2008). Redefining the serotonergic system by genetic lineage.  
1581 *Nat Neurosci* 11, 417-419.
- 1582 Ji, X., Wang, H., Zhu, M., He, Y., Zhang, H., Chen, X., Gao, W., Fu, Y., and  
1583 Alzheimer's Disease Neuroimaging, I. (2020). Brainstem atrophy in the early  
1584 stage of Alzheimer's disease: a voxel-based morphometry study. *Brain Imaging*  
1585 *Behav*.
- 1586 Johnson, M.D. (1994). Synaptic glutamate release by postnatal rat serotonergic  
1587 neurons in microculture. *Neuron* 12, 433-442.
- 1588 Joyner, A.L., Kornberg, T., Coleman, K.G., Cox, D.R., and Martin, G.R. (1985).  
1589 Expression during embryogenesis of a mouse gene with sequence homology to  
1590 the *Drosophila engrailed* gene. *Cell* 43, 29-37.
- 1591 Joyner, A.L., and Martin, G.R. (1987). *En-1* and *En-2*, two mouse genes with  
1592 sequence homology to the *Drosophila engrailed* gene: expression during  
1593 embryogenesis. *Genes Dev* 1, 29-38.
- 1594 Judge, S.J., Ingram, C.D., and Gartside, S.E. (2004). Moderate differences in  
1595 circulating corticosterone alter receptor-mediated regulation of 5-  
1596 hydroxytryptamine neuronal activity. *J Psychopharmacol* 18, 475-483.
- 1597 Kapoor, V., Provost, A.C., Agarwal, P., and Murthy, V.N. (2016). Activation of  
1598 raphe nuclei triggers rapid and distinct effects on parallel olfactory bulb output  
1599 channels. *Nat Neurosci* 19, 271-282.
- 1600 Kast, R.J., Wu, H.H., Williams, P., Gaspar, P., and Levitt, P. (2017). Specific  
1601 Connectivity and Unique Molecular Identity of MET Receptor Tyrosine Kinase  
1602 Expressing Serotonergic Neurons in the Caudal Dorsal Raphe Nuclei. *ACS*  
1603 *Chem Neurosci* 8, 1053-1064.

- 1604 Kim, J.C., Cook, M.N., Carey, M.R., Shen, C., Regehr, W.G., and Dymecki, S.M.  
1605 (2009). Linking genetically defined neurons to behavior through a broadly  
1606 applicable silencing allele. *Neuron* 63, 305-315.
- 1607 Kimmel, R.A., Turnbull, D.H., Blanquet, V., Wurst, W., Loomis, C.A., and Joyner,  
1608 A.L. (2000). Two lineage boundaries coordinate vertebrate apical ectodermal  
1609 ridge formation. *Genes Dev* 14, 1377-1389.
- 1610 Kirby, L.G., Pernar, L., Valentino, R.J., and Beck, S.G. (2003). Distinguishing  
1611 characteristics of serotonin and non-serotonin-containing cells in the dorsal raphe  
1612 nucleus: electrophysiological and immunohistochemical studies. *Neuroscience*  
1613 116, 669-683.
- 1614 Kosofsky, B.E., and Molliver, M.E. (1987). The serotonergic innervation of  
1615 cerebral cortex: different classes of axon terminals arise from dorsal and median  
1616 raphe nuclei. *Synapse* 1, 153-168.
- 1617 Krueger, K.C., and Deneris, E.S. (2008). Serotonergic transcription of human  
1618 FEV reveals direct GATA factor interactions and fate of Pet-1-deficient serotonin  
1619 neuron precursors. *J Neurosci* 28, 12748-12758.
- 1620 Laaris, N., Haj-Dahmane, S., Hamon, M., and Lanfumey, L. (1995).  
1621 Glucocorticoid receptor-mediated inhibition by corticosterone of 5-HT1A  
1622 autoreceptor functioning in the rat dorsal raphe nucleus. *Neuropharmacology* 34,  
1623 1201-1210.
- 1624 Land, B.B., Bruchas, M.R., Lemos, J.C., Xu, M., Melief, E.J., and Chavkin, C.  
1625 (2008). The dysphoric component of stress is encoded by activation of the  
1626 dynorphin kappa-opioid system. *J Neurosci* 28, 407-414.
- 1627 Land, B.B., Bruchas, M.R., Schattauer, S., Giardino, W.J., Aita, M., Messinger,  
1628 D., Hnasko, T.S., Palmiter, R.D., and Chavkin, C. (2009). Activation of the kappa  
1629 opioid receptor in the dorsal raphe nucleus mediates the aversive effects of  
1630 stress and reinstates drug seeking. *Proc Natl Acad Sci U S A* 106, 19168-19173.
- 1631 Lazaro-Pena, M.I., Diaz-Balzac, C.A., Bulow, H.E., and Emmons, S.W. (2018).  
1632 Synaptogenesis Is Modulated by Heparan Sulfate in *Caenorhabditis elegans*.  
1633 *Genetics* 209, 195-208.
- 1634 Lesch, K.P., Wolozin, B.L., Estler, H.C., Murphy, D.L., and Riederer, P. (1993).  
1635 Isolation of a cDNA encoding the human brain serotonin transporter. *J Neural*  
1636 *Transm Gen Sect* 91, 67-72.
- 1637 Levine, E.S., and Jacobs, B.L. (1992). Neurochemical afferents controlling the  
1638 activity of serotonergic neurons in the dorsal raphe nucleus: microiontophoretic  
1639 studies in the awake cat. *J Neurosci* 12, 4037-4044.

- 1640 Lidov, H.G., Grzanna, R., and Molliver, M.E. (1980). The serotonin innervation of  
1641 the cerebral cortex in the rat--an immunohistochemical analysis. *Neuroscience* 5,  
1642 207-227.
- 1643 Lidov, H.G., and Molliver, M.E. (1982). Immunohistochemical study of the  
1644 development of serotonergic neurons in the rat CNS. *Brain Res Bull* 9, 559-604.
- 1645 Lin, J.H., Takano, T., Arcuino, G., Wang, X., Hu, F., Darzynkiewicz, Z., Nunes,  
1646 M., Goldman, S.A., and Nedergaard, M. (2007). Purinergic signaling regulates  
1647 neural progenitor cell expansion and neurogenesis. *Dev Biol* 302, 356-366.
- 1648 Liu, C., Maejima, T., Wyler, S.C., Casadesus, G., Herlitze, S., and Deneris, E.S.  
1649 (2010). Pet-1 is required across different stages of life to regulate serotonergic  
1650 function. *Nat Neurosci* 13, 1190-1198.
- 1651 Liu, Z., Zhou, J., Li, Y., Hu, F., Lu, Y., Ma, M., Feng, Q., Zhang, J.E., Wang, D.,  
1652 Zeng, J., *et al.* (2014). Dorsal raphe neurons signal reward through 5-HT and  
1653 glutamate. *Neuron* 81, 1360-1374.
- 1654 Lorez, H.P., and Richards, J.G. (1982). Supra-ependymal serotonergic nerves  
1655 in mammalian brain: morphological, pharmacological and functional studies.  
1656 *Brain Res Bull* 9, 727-741.
- 1657 Lovatt, D., Ruble, B.K., Lee, J., Dueck, H., Kim, T.K., Fisher, S., Francis, C.,  
1658 Spaethling, J.M., Wolf, J.A., Grady, M.S., *et al.* (2014). Transcriptome in vivo  
1659 analysis (TIVA) of spatially defined single cells in live tissue. *Nat Methods* 11,  
1660 190-196.
- 1661 Love, C.E., and Prince, V.E. (2012). Expression and retinoic acid regulation of  
1662 the zebrafish nr2f orphan nuclear receptor genes. *Dev Dyn* 241, 1603-1615.
- 1663 Luo, J., Feng, Q., Wei, L., and Luo, M. (2017). Optogenetic activation of dorsal  
1664 raphe neurons rescues the autistic-like social deficits in Shank3 knockout mice.  
1665 *Cell Res* 27, 950-953.
- 1666 Macosko, E.Z., Basu, A., Satija, R., Nemes, J., Shekhar, K., Goldman, M.,  
1667 Tirosh, I., Bialas, A.R., Kamitaki, N., Martersteck, E.M., *et al.* (2015). Highly  
1668 Parallel Genome-wide Expression Profiling of Individual Cells Using Nanoliter  
1669 Droplets. *Cell* 161, 1202-1214.
- 1670 Maddaloni, G., Bertero, A., Pratelli, M., Barsotti, N., Boonstra, A., Giorgi, A.,  
1671 Migliarini, S., and Pasqualetti, M. (2017). Development of Serotonergic Fibers in  
1672 the Post-Natal Mouse Brain. *Front Cell Neurosci* 11, 202.
- 1673 Madisen, L., Garner, A.R., Shimaoka, D., Chuong, A.S., Klapoetke, N.C., Li, L.,  
1674 van der Bourg, A., Niino, Y., Egolf, L., Monetti, C., *et al.* (2015). Transgenic mice

- 1675 for intersectional targeting of neural sensors and effectors with high specificity  
1676 and performance. *Neuron* 85, 942-958.
- 1677 Makrides, N., Panayiotou, E., Fanis, P., Karaikos, C., Lapathitis, G., and Malas,  
1678 S. (2018). Sequential Role of SOXB2 Factors in GABAergic Neuron Specification  
1679 of the Dorsal Midbrain. *Front Mol Neurosci* 11, 152.
- 1680 McDevitt, R.A., Tiran-Cappello, A., Shen, H., Balderas, I., Britt, J.P., Marino,  
1681 R.A., Chung, S.L., Richie, C.T., Harvey, B.K., and Bonci, A. (2014). Serotonergic  
1682 versus nonserotonergic dorsal raphe projection neurons: differential participation  
1683 in reward circuitry. *Cell Rep* 8, 1857-1869.
- 1684 Michaelson, J.J., Shin, M.K., Koh, J.Y., Brueggeman, L., Zhang, A., Katzman, A.,  
1685 McDaniel, L., Fang, M., Pufall, M., and Pieper, A.A. (2017). Neuronal PAS  
1686 Domain Proteins 1 and 3 Are Master Regulators of Neuropsychiatric Risk Genes.  
1687 *Biol Psychiatry* 82, 213-223.
- 1688 Michelsen, K.A., Prickaerts, J., and Steinbusch, H.W. (2008). The dorsal raphe  
1689 nucleus and serotonin: implications for neuroplasticity linked to major depression  
1690 and Alzheimer's disease. *Prog Brain Res* 172, 233-264.
- 1691 Michelsen, K.A., Schmitz, C., and Steinbusch, H.W. (2007). The dorsal raphe  
1692 nucleus--from silver stainings to a role in depression. *Brain Res Rev* 55, 329-342.
- 1693 Minge, D., Senkov, O., Kaushik, R., Herde, M.K., Tikhobrazova, O., Wulff, A.B.,  
1694 Mironov, A., van Kuppevelt, T.H., Oosterhof, A., Kochlamazashvili, G., *et al.*  
1695 (2017). Heparan Sulfates Support Pyramidal Cell Excitability, Synaptic Plasticity,  
1696 and Context Discrimination. *Cereb Cortex* 27, 903-918.
- 1697 Mirzadeh, Z., Doetsch, F., Sawamoto, K., Wichterle, H., and Alvarez-Buylla, A.  
1698 (2010). The subventricular zone en-face: wholemount staining and ependymal  
1699 flow. *J Vis Exp*.
- 1700 Miyazaki, K., Narita, N., and Narita, M. (2005). Maternal administration of  
1701 thalidomide or valproic acid causes abnormal serotonergic neurons in the  
1702 offspring: implication for pathogenesis of autism. *Int J Dev Neurosci* 23, 287-297.
- 1703 Molliver, M.E. (1987). Serotonergic neuronal systems: what their anatomic  
1704 organization tells us about function. *J Clin Psychopharmacol* 7, 3S-23S.
- 1705 Mosko, S.S., Haubrich, D., and Jacobs, B.L. (1977). Serotonergic afferents to the  
1706 dorsal raphe nucleus: evidence from HRP and synaptosomal uptake studies.  
1707 *Brain Res* 119, 269-290.



- 1708 Munster-Wandowski, A., Zander, J.F., Richter, K., and Ahnert-Hilger, G. (2016).  
1709 Co-existence of Functionally Different Vesicular Neurotransmitter Transporters.  
1710 Front Synaptic Neurosci 8, 4.
- 1711 Muzerelle, A., Scotto-Lomassese, S., Bernard, J.F., Soiza-Reilly, M., and  
1712 Gaspar, P. (2016). Conditional anterograde tracing reveals distinct targeting of  
1713 individual serotonin cell groups (B5-B9) to the forebrain and brainstem. Brain  
1714 Struct Funct 221, 535-561.
- 1715 Negoias, S., Croy, I., Gerber, J., Puschmann, S., Petrowski, K., Joraschky, P.,  
1716 and Hummel, T. (2010). Reduced olfactory bulb volume and olfactory sensitivity  
1717 in patients with acute major depression. Neuroscience 169, 415-421.
- 1718 Niederkofler, V., Asher, T.E., Okaty, B.W., Rood, B.D., Narayan, A., Hwa, L.S.,  
1719 Beck, S.G., Miczek, K.A., and Dymecki, S.M. (2016). Identification of  
1720 Serotonergic Neuronal Modules that Affect Aggressive Behavior. Cell Rep 17,  
1721 1934-1949.
- 1722 Nyberg, J., Anderson, M.F., Meister, B., Alborn, A.M., Strom, A.K., Brederlau, A.,  
1723 Illerskog, A.C., Nilsson, O., Kieffer, T.J., Hietala, M.A., *et al.* (2005). Glucose-  
1724 dependent insulinotropic polypeptide is expressed in adult hippocampus and  
1725 induces progenitor cell proliferation. J Neurosci 25, 1816-1825.
- 1726 O'Hearn, E., and Molliver, M.E. (1984). Organization of raphe-cortical projections  
1727 in rat: a quantitative retrograde study. Brain Res Bull 13, 709-726.
- 1728 Ogawa, S.K., Cohen, J.Y., Hwang, D., Uchida, N., and Watabe-Uchida, M.  
1729 (2014). Organization of monosynaptic inputs to the serotonin and dopamine  
1730 neuromodulatory systems. Cell Rep 8, 1105-1118.
- 1731 Okaty, B.W., Commons, K.G., and Dymecki, S.M. (2019). Embracing diversity in  
1732 the 5-HT neuronal system. Nat Rev Neurosci.
- 1733 Okaty, B.W., Freret, M.E., Rood, B.D., Brust, R.D., Hennessy, M.L., deBairos, D.,  
1734 Kim, J.C., Cook, M.N., and Dymecki, S.M. (2015). Multi-Scale Molecular  
1735 Deconstruction of the Serotonin Neuron System. Neuron 88, 774-791.
- 1736 Pelosi, B., Migliarini, S., Pacini, G., Pratelli, M., and Pasqualetti, M. (2014).  
1737 Generation of Pet1210-Cre transgenic mouse line reveals non-serotonergic  
1738 expression domains of Pet1 both in CNS and periphery. PLoS One 9, e104318.
- 1739 Peyron, C., Petit, J.M., Rampon, C., Jouvret, M., and Luppi, P.H. (1998).  
1740 Forebrain afferents to the rat dorsal raphe nucleus demonstrated by retrograde  
1741 and anterograde tracing methods. Neuroscience 82, 443-468.

- 1742 Peyron, C., Rampon, C., Petit, J.M., and Luppi, P.H. (2018). Sub-regions of the  
1743 dorsal raphe nucleus receive different inputs from the brainstem. *Sleep Med* 49,  
1744 53-63.
- 1745 Pillai, A., Mansouri, A., Behringer, R., Westphal, H., and Goulding, M. (2007).  
1746 *Lhx1* and *Lhx5* maintain the inhibitory-neurotransmitter status of interneurons in  
1747 the dorsal spinal cord. *Development* 134, 357-366.
- 1748 Pollak Dorocic, I., Furth, D., Xuan, Y., Johansson, Y., Pozzi, L., Silberberg, G.,  
1749 Carlen, M., and Meletis, K. (2014). A whole-brain atlas of inputs to serotonergic  
1750 neurons of the dorsal and median raphe nuclei. *Neuron* 83, 663-678.
- 1751 Poulin, J.F., Tasic, B., Hjerling-Leffler, J., Trimarchi, J.M., and Awatramani, R.  
1752 (2016). Disentangling neural cell diversity using single-cell transcriptomics. *Nat*  
1753 *Neurosci* 19, 1131-1141.
- 1754 Prakash, N., Stark, C.J., Keisler, M.N., Luo, L., Der-Avakian, A., and Dulcis, D.  
1755 (2019). Serotonergic plasticity in the dorsal raphe nucleus characterizes  
1756 susceptibility and resilience to anhedonia. *J Neurosci*.
- 1757 Prouty, E.W., Chandler, D.J., and Waterhouse, B.D. (2017). Neurochemical  
1758 differences between target-specific populations of rat dorsal raphe projection  
1759 neurons. *Brain Res*.
- 1760 Ray, R.S., Corcoran, A.E., Brust, R.D., Kim, J.C., Richerson, G.B., Nattie, E., and  
1761 Dymecki, S.M. (2011). Impaired respiratory and body temperature control upon  
1762 acute serotonergic neuron inhibition. *Science* 333, 637-642.
- 1763 Ren, J., Friedmann, D., Xiong, J., Liu, C.D., Ferguson, B.R., Weerakkody, T.,  
1764 DeLoach, K.E., Ran, C., Pun, A., Sun, Y., *et al.* (2018). Anatomically Defined and  
1765 Functionally Distinct Dorsal Raphe Serotonin Sub-systems. *Cell* 175, 472-487  
1766 e420.
- 1767 Ren, J., Isakova, A., Friedmann, D., Zeng, J., Grutzner, S.M., Pun, A., Zhao,  
1768 G.Q., Kolluru, S.S., Wang, R., Lin, R., *et al.* (2019). Single-cell transcriptomes  
1769 and whole-brain projections of serotonin neurons in the mouse dorsal and  
1770 median raphe nuclei. *Elife* 8.
- 1771 Rood, B.D., Calizo, L.H., Piel, D., Spangler, Z.P., Campbell, K., and Beck, S.G.  
1772 (2014). Dorsal raphe serotonin neurons in mice: immature hyperexcitability  
1773 transitions to adult state during first three postnatal weeks suggesting sensitive  
1774 period for environmental perturbation. *J Neurosci* 34, 4809-4821.
- 1775 Rosenberg, A.B., Roco, C.M., Muscat, R.A., Kuchina, A., Sample, P., Yao, Z.,  
1776 Grayback, L.T., Peeler, D.J., Mukherjee, S., Chen, W., *et al.* (2018). Single-cell

- 1777 profiling of the developing mouse brain and spinal cord with split-pool barcoding.  
1778 Science 360, 176-182.
- 1779 Saunders, A., Macosko, E.Z., Wysocki, A., Goldman, M., Krienen, F.M., de  
1780 Rivera, H., Bien, E., Baum, M., Bortolin, L., Wang, S., *et al.* (2018). Molecular  
1781 Diversity and Specializations among the Cells of the Adult Mouse Brain. Cell 174,  
1782 1015-1030 e1016.
- 1783 Sciolino, N.R., Plummer, N.W., Chen, Y.W., Alexander, G.M., Robertson, S.D.,  
1784 Dudek, S.M., McElligott, Z.A., and Jensen, P. (2016). Recombinase-Dependent  
1785 Mouse Lines for Chemogenetic Activation of Genetically Defined Cell Types. Cell  
1786 Rep 15, 2563-2573.
- 1787 Sengupta, A., Bocchio, M., Bannerman, D.M., Sharp, T., and Capogna, M.  
1788 (2017). Control of Amygdala Circuits by 5-HT Neurons via 5-HT and Glutamate  
1789 Cotransmission. J Neurosci 37, 1785-1796.
- 1790 Shikanai, H., Yoshida, T., Konno, K., Yamasaki, M., Izumi, T., Ohmura, Y.,  
1791 Watanabe, M., and Yoshioka, M. (2012). Distinct neurochemical and functional  
1792 properties of GAD67-containing 5-HT neurons in the rat dorsal raphe nucleus. J  
1793 Neurosci 32, 14415-14426.
- 1794 Simic, G., Babic Leko, M., Wray, S., Harrington, C.R., Delalle, I., Jovanov-  
1795 Milosevic, N., Bazadona, D., Buee, L., de Silva, R., Di Giovanni, G., *et al.* (2017).  
1796 Monoaminergic neuropathology in Alzheimer's disease. Prog Neurobiol 151, 101-  
1797 138.
- 1798 Siopi, E., Denizet, M., Gabellec, M.M., de Chaumont, F., Olivo-Marin, J.C.,  
1799 Guilloux, J.P., Lledo, P.M., and Lazarini, F. (2016). Anxiety- and Depression-Like  
1800 States Lead to Pronounced Olfactory Deficits and Impaired Adult Neurogenesis  
1801 in Mice. J Neurosci 36, 518-531.
- 1802 Soghomonian, J.J., and Martin, D.L. (1998). Two isoforms of glutamate  
1803 decarboxylase: why? Trends Pharmacol Sci 19, 500-505.
- 1804 Sos, K.E., Mayer, M.I., Cserep, C., Takacs, F.S., Szonyi, A., Freund, T.F., and  
1805 Nyiri, G. (2017). Cellular architecture and transmitter phenotypes of neurons of  
1806 the mouse median raphe region. Brain Struct Funct 222, 287-299.
- 1807 Soumier, A., Banasr, M., Kerkerian-Le Goff, L., and Daszuta, A. (2010). Region-  
1808 and phase-dependent effects of 5-HT(1A) and 5-HT(2C) receptor activation on  
1809 adult neurogenesis. Eur Neuropsychopharmacol 20, 336-345.
- 1810 Spaethling, J.M., Piel, D., Dueck, H., Buckley, P.T., Morris, J.F., Fisher, S.A.,  
1811 Lee, J., Sul, J.Y., Kim, J., Bartfai, T., *et al.* (2014). Serotonergic neuron regulation  
1812 informed by in vivo single-cell transcriptomics. FASEB J 28, 771-780.

- 1813 Stanco, A., Pla, R., Vogt, D., Chen, Y., Mandal, S., Walker, J., Hunt, R.F.,  
1814 Lindtner, S., Erdman, C.A., Pieper, A.A., *et al.* (2014). NPAS1 represses the  
1815 generation of specific subtypes of cortical interneurons. *Neuron* 84, 940-953.
- 1816 Steinbusch, H.W. (1981). Distribution of serotonin-immunoreactivity in the central  
1817 nervous system of the rat-cell bodies and terminals. *Neuroscience* 6, 557-618.
- 1818 Steinbusch, H.W., van der Kooy, D., Verhofstad, A.A., and Pellegrino, A. (1980).  
1819 Serotonergic and non-serotonergic projections from the nucleus raphe dorsalis to  
1820 the caudate-putamen complex in the rat, studied by a combined  
1821 immunofluorescence and fluorescent retrograde axonal labeling technique.  
1822 *Neurosci Lett* 19, 137-142.
- 1823 Steinbusch, H.W., Verhofstad, A.A., and Joosten, H.W. (1978). Localization of  
1824 serotonin in the central nervous system by immunohistochemistry: description of  
1825 a specific and sensitive technique and some applications. *Neuroscience* 3, 811-  
1826 819.
- 1827 Stuart, T., Butler, A., Hoffman, P., Hafemeister, C., Papalexi, E., Mauck, W.M.,  
1828 3rd, Hao, Y., Stoeckius, M., Smibert, P., and Satija, R. (2019). Comprehensive  
1829 Integration of Single-Cell Data. *Cell* 177, 1888-1902 e1821.
- 1830 Tasic, B. (2018). Single cell transcriptomics in neuroscience: cell classification  
1831 and beyond. *Curr Opin Neurobiol* 50, 242-249.
- 1832 Tasic, B., Menon, V., Nguyen, T.N., Kim, T.K., Jarsky, T., Yao, Z., Levi, B., Gray,  
1833 L.T., Sorensen, S.A., Dolbeare, T., *et al.* (2016). Adult mouse cortical cell  
1834 taxonomy revealed by single cell transcriptomics. *Nat Neurosci* 19, 335-346.
- 1835 Tasic, B., Yao, Z., Graybuck, L.T., Smith, K.A., Nguyen, T.N., Bertagnolli, D.,  
1836 Goldy, J., Garren, E., Economo, M.N., Viswanathan, S., *et al.* (2018). Shared and  
1837 distinct transcriptomic cell types across neocortical areas. *Nature* 563, 72-78.
- 1838 Teissier, A., Chemiakine, A., Inbar, B., Bagchi, S., Ray, R.S., Palmiter, R.D.,  
1839 Dymecki, S.M., Moore, H., and Ansorge, M.S. (2015). Activity of Raphe  
1840 Serotonergic Neurons Controls Emotional Behaviors. *Cell Rep* 13, 1965-1976.
- 1841 Teng, T., Gaillard, A., Muzerelle, A., and Gaspar, P. (2017). EphrinA5 Signaling  
1842 Is Required for the Distinctive Targeting of Raphe Serotonin Neurons in the  
1843 Forebrain. *eNeuro* 4.
- 1844 Tong, C.K., Chen, J., Cebrian-Silla, A., Mirzadeh, Z., Obernier, K., Guinto, C.D.,  
1845 Tecott, L.H., Garcia-Verdugo, J.M., Kriegstein, A., and Alvarez-Buylla, A. (2014).  
1846 Axonal control of the adult neural stem cell niche. *Cell Stem Cell* 14, 500-511.

- 1847 Tritsch, N.X., Ding, J.B., and Sabatini, B.L. (2012). Dopaminergic neurons inhibit  
1848 striatal output through non-canonical release of GABA. *Nature* 490, 262-266.
- 1849 Trivellin, G., Bjelobaba, I., Daly, A.F., Larco, D.O., Palmeira, L., Faucz, F.R.,  
1850 Thiry, A., Leal, L.F., Rostomyan, L., Quezado, M., *et al.* (2016). Characterization  
1851 of GPR101 transcript structure and expression patterns. *J Mol Endocrinol* 57, 97-  
1852 111.
- 1853 Trivellin, G., Hernandez-Ramirez, L.C., Swan, J., and Stratakis, C.A. (2018). An  
1854 orphan G-protein-coupled receptor causes human gigantism and/or acromegaly:  
1855 Molecular biology and clinical correlations. *Best Pract Res Clin Endocrinol Metab*  
1856 32, 125-140.
- 1857 Usoskin, D., Furlan, A., Islam, S., Abdo, H., Lonnerberg, P., Lou, D., Hjerling-  
1858 Leffler, J., Haeggstrom, J., Kharchenko, O., Kharchenko, P.V., *et al.* (2015).  
1859 Unbiased classification of sensory neuron types by large-scale single-cell RNA  
1860 sequencing. *Nat Neurosci* 18, 145-153.
- 1861 Vakalopoulos, C. (2017). Alzheimer's Disease: The Alternative Serotonergic  
1862 Hypothesis of Cognitive Decline. *J Alzheimers Dis* 60, 859-866.
- 1863 Vasudeva, R.K., Lin, R.C., Simpson, K.L., and Waterhouse, B.D. (2011).  
1864 Functional organization of the dorsal raphe efferent system with special  
1865 consideration of nitroergic cell groups. *J Chem Neuroanat* 41, 281-293.
- 1866 Vasudeva, R.K., and Waterhouse, B.D. (2014). Cellular profile of the dorsal  
1867 raphe lateral wing sub-region: relationship to the lateral dorsal tegmental  
1868 nucleus. *J Chem Neuroanat* 57-58, 15-23.
- 1869 Vertes, R.P. (1991). A PHA-L analysis of ascending projections of the dorsal  
1870 raphe nucleus in the rat. *J Comp Neurol* 313, 643-668.
- 1871 Vertes, R.P., and Kocsis, B. (1994). Projections of the dorsal raphe nucleus to  
1872 the brainstem: PHA-L analysis in the rat. *J Comp Neurol* 340, 11-26.
- 1873 Vincent, M.Y., Donner, N.C., Smith, D.G., Lowry, C.A., and Jacobson, L. (2018).  
1874 Dorsal raphe nucleus glucocorticoid receptors inhibit *tph2* gene expression in  
1875 male C57BL/6J mice. *Neurosci Lett* 665, 48-53.
- 1876 Vincent, M.Y., and Jacobson, L. (2014). Glucocorticoid receptor deletion from the  
1877 dorsal raphe nucleus of mice reduces dysphoria-like behavior and impairs  
1878 hypothalamic-pituitary-adrenocortical axis feedback inhibition. *Eur J Neurosci* 39,  
1879 1671-1681.
- 1880 Voisin, A.N., Mnie-Filali, O., Giguere, N., Fortin, G.M., Vigneault, E., El  
1881 Mestikawy, S., Descarries, L., and Trudeau, L.E. (2016). Axonal Segregation and

- 1882 Role of the Vesicular Glutamate Transporter VGLUT3 in Serotonin Neurons.  
1883 *Front Neuroanat* 10, 39.
- 1884 Walther, D.J., and Bader, M. (2003). A unique central tryptophan hydroxylase  
1885 isoform. *Biochem Pharmacol* 66, 1673-1680.
- 1886 Walther, D.J., Peter, J.U., Bashammakh, S., Hortnagl, H., Voits, M., Fink, H., and  
1887 Bader, M. (2003). Synthesis of serotonin by a second tryptophan hydroxylase  
1888 isoform. *Science* 299, 76.
- 1889 Wang, H.L., Zhang, S., Qi, J., Wang, H., Cachope, R., Mejias-Aponte, C.A.,  
1890 Gomez, J.A., Mateo-Semidey, G.E., Beaudoin, G.M.J., Paladini, C.A., *et al.*  
1891 (2019). Dorsal Raphe Dual Serotonin-Glutamate Neurons Drive Reward by  
1892 Establishing Excitatory Synapses on VTA Mesoaccumbens Dopamine Neurons.  
1893 *Cell Rep* 26, 1128-1142 e1127.
- 1894 Wang, R., Hausknecht, K., Shen, R.Y., and Haj-Dahmane, S. (2018).  
1895 Potentiation of Glutamatergic Synaptic Transmission Onto Dorsal Raphe  
1896 Serotonergic Neurons in the Valproic Acid Model of Autism. *Front Pharmacol* 9,  
1897 1185.
- 1898 Watanabe, M., Serizawa, M., Sawada, T., Takeda, K., Takahashi, T., Yamamoto,  
1899 N., Koizumi, F., and Koh, Y. (2014). A novel flow cytometry-based cell capture  
1900 platform for the detection, capture and molecular characterization of rare tumor  
1901 cells in blood. *J Transl Med* 12, 143.
- 1902 Weissbourd, B., Ren, J., DeLoach, K.E., Guenther, C.J., Miyamichi, K., and  
1903 Luo, L. (2014). Presynaptic partners of dorsal raphe serotonergic and GABAergic  
1904 neurons. *Neuron* 83, 645-662.
- 1905 Wu, H.H., and Levitt, P. (2013). Prenatal expression of MET receptor tyrosine  
1906 kinase in the fetal mouse dorsal raphe nuclei and the visceral motor/sensory  
1907 brainstem. *Dev Neurosci* 35, 1-16.
- 1908 Wyler, S.C., Donovan, L.J., Yeager, M., and Deneris, E. (2015). Pet-1 Controls  
1909 Tetrahydrobiopterin Pathway and Slc22a3 Transporter Genes in Serotonin  
1910 Neurons. *ACS Chem Neurosci* 6, 1198-1205.
- 1911 Wyler, S.C., Spencer, W.C., Green, N.H., Rood, B.D., Crawford, L., Craige, C.,  
1912 Gresch, P., McMahon, D.G., Beck, S.G., and Deneris, E. (2016). Pet-1 Switches  
1913 Transcriptional Targets Postnatally to Regulate Maturation of Serotonin Neuron  
1914 Excitability. *J Neurosci* 36, 1758-1774.
- 1915 Ye, W., Bouchard, M., Stone, D., Liu, X., Vella, F., Lee, J., Nakamura, H., Ang,  
1916 S.L., Busslinger, M., and Rosenthal, A. (2001). Distinct regulators control the

- 1917 expression of the mid-hindbrain organizer signal FGF8. *Nat Neurosci* 4, 1175-  
1918 1181.
- 1919 Ye, Y., Zhao, Z., Xu, H., Zhang, X., Su, X., Yang, Y., Yu, X., and He, X. (2016).  
1920 Activation of Sphingosine 1-Phosphate Receptor 1 Enhances Hippocampus  
1921 Neurogenesis in a Rat Model of Traumatic Brain Injury: An Involvement of  
1922 MEK/Erk Signaling Pathway. *Neural Plast* 2016, 8072156.
- 1923 Zeisel, A., Hochgerner, H., Lonnerberg, P., Johnsson, A., Memic, F., van der  
1924 Zwan, J., Haring, M., Braun, E., Borm, L.E., La Manno, G., *et al.* (2018).  
1925 Molecular Architecture of the Mouse Nervous System. *Cell* 174, 999-1014 e1022.
- 1926 Zeisel, A., Munoz-Manchado, A.B., Codeluppi, S., Lonnerberg, P., La Manno, G.,  
1927 Jureus, A., Marques, S., Munguba, H., He, L., Betsholtz, C., *et al.* (2015). Brain  
1928 structure. Cell types in the mouse cortex and hippocampus revealed by single-  
1929 cell RNA-seq. *Science* 347, 1138-1142.
- 1930 Zhang, P., Lu, H., Peixoto, R.T., Pines, M.K., Ge, Y., Oku, S., Siddiqui, T.J., Xie,  
1931 Y., Wu, W., Archer-Hartmann, S., *et al.* (2018). Heparan Sulfate Organizes  
1932 Neuronal Synapses through Neurexin Partnerships. *Cell* 174, 1450-1464 e1423.
- 1933 Zweig, R.M., Ross, C.A., Hedreen, J.C., Steele, C., Cardillo, J.E., Whitehouse,  
1934 P.J., Folstein, M.F., and Price, D.L. (1988). The neuropathology of aminergic  
1935 nuclei in Alzheimer's disease. *Ann Neurol* 24, 233-242.

1936

## 1937 **Figure Legends**

1938 Figure 1: High throughput scRNA-seq and clustering analyses reveal as many as  
1939 fourteen distinct molecularly-defined subtypes (clusters) of *Pet1* neurons in the  
1940 mouse DR. (A) Schematic depicting the experimental and analytical workflow,  
1941 specifically: (1) brain dissection and DR microdissection, (2) cellular dissociation  
1942 and microfluidic fluorescence-based cell sorting using the On-chip  
1943 Biotechnologies system, and (3) library preparation, sequencing, and analysis  
1944 using 10X genomics, Illumina sequencing, and the R package Seurat,  
1945 respectively. (B) Hierarchical clustering of *Pet1* neuron subtypes identified by  
1946 Louvain clustering (using the top two thousand genes with the highest variance,  
1947 PCs = 1:5, 8:50, and resolution=0.9), with violin plots depicting the log-  
1948 normalized expression of a common set of genes (*Tph2*, *Gad2*, *Gad1*, *Vglut3*,

1949 and *Met*) found useful for characterizing cluster structure across multiple  
1950 resolutions (see Figure 1- figure supplement 2). (C) UMAP visualization of single-  
1951 neuron transcriptome community/similarity structure, with colors and numbers  
1952 indicating discrete clusters (same clustering parameters as (B)). (D) Heatmap  
1953 depicting the scaled expression of the top five marker genes for each cluster  
1954 (ranked by p-value, or in some cases fold enrichment).

1955 Figure 1 - figure supplement 1: Systematic variation of key clustering parameters  
1956 allows for exploration of the community structure of DR *Pet1* single neuron  
1957 transcriptomes at variable resolutions. (A) Scatterplot of the variance (standard  
1958 deviation, Y-axis) explained by the first 250 principal components (X-axis). (B)  
1959 Level plot/heat map depicting the number of clusters (DR *Pet1* neuron subtypes)  
1960 resulting from variation of the number of included principle components (Y-axis)  
1961 and the resolution parameter to the Seurat function FindClusters (X-axis). (C)  
1962 Line graph of the frequency (Y-axis) that a given number of clusters (X-axis)  
1963 arises from the analysis performed in B. (D) Plots showing the parameters  
1964 (white) that lead to cluster numbers found to have the highest frequency (5, 11,  
1965 14, and 17 clusters, top left to bottom right respectively).

1966 Figure 1 - figure supplement 2: Analysis of clusters at successively increasing  
1967 resolution values. (A, D, G) Hierarchical clustering of *Pet1* neuron subtypes  
1968 identified by Louvain clustering at varying resolutions (specifically, the resolution  
1969 value passed to the Seurat function FindClusters A= 0.1, D= 0.3, G= 0.7), and  
1970 violin plots depicting the normalized expression of *Tph2*, *Gad2*, *Gad1*, *Vglut3*,  
1971 and *Met*. (B, E, H) UMAP visualization of community structure at a given  
1972 resolution (B= 0.1, E= 0.3, H= 0.7). (C, F, I) Heatmap depicting the scaled  
1973 expression of the top five marker genes for each cluster (ranked by p-value).

1974 Figure 1 - figure supplement 3: Expression of serotonin-related genes across DR  
1975 *Pet1* neuron subtypes. Violin plots depicting the log-normalized expression of  
1976 twelve serotonin neuron marker genes across the fourteen *Pet1* neuron clusters.



1977 Figure 2: Expression patterns of a subset of highly variable genes classified by  
1978 biological function. Dot plots show the expression of a gene (Y-axis) in each  
1979 cluster (X-axis), separated by biological function. The size of the dot represents  
1980 the percentage of cells expressing the gene and saturation of color represents  
1981 average normalized expression level. For convenience, the UMAP plot from  
1982 Figure 1C is re-displayed at the bottom right to help link gene expression  
1983 patterns to overall cluster structure. Minimum inclusion criteria for genes was that  
1984 they were among the top 2000 highest variance genes and/or they were found to  
1985 be significantly enriched or “de-enriched” in at least one subtype cluster.

1986 Figure 3: Intersectionally targeted *Pet1* neuron subtypes have different  
1987 anatomical distributions in subregions of the DR. (A-E) Low magnification view of  
1988 40  $\mu\text{m}$  coronal sections showing the DR from rostral to caudal (1-6) in triple  
1989 transgenic animals. Cell bodies are labeled by the intersectional expression of a  
1990 Cre driver of interest, *Pet1::Flpe*, and the intersectional allele *FrePe* (green eGFP  
1991 marked cells expressing both Cre and Flpe and red mCherry expressing  
1992 *Pet1::Flpe* subtractive population) unless otherwise noted. (A) *Sert::cre*;  
1993 *Pet1::Flpe; FrePe*, (B) *Vglut3::cre; Pet1::Flpe; hM3Dq* (green mCherry-hM3Dq  
1994 marked cells expressing Cre and Flpe and red eGFP expressing *Pet1::Flpe*  
1995 subtractive population), (C) *Npy2r::IRES-cre; Pet1::Flpe; FrePe*, (D)  
1996 *P2ry1::IRES-cre; Pet1::Flpe; FrePe*. Top row shows violin plots depicting  
1997 transcript expression (10X scRNA-seq data) of the respective gene  
1998 corresponding with each Cre driver. Scale bar (A1) equals 100  $\mu\text{m}$ .

1999 Figure 3 - figure supplement 1: TPH2 and VGLUT3 antibody staining of *Pet1*  
2000 neurons is anatomically biased within different DR subdomains. (A) Bar graph  
2001 showing the percentage of *Pet1* cells that are TPH2-negative in a specific  
2002 anatomical subdivision of the DR in an *En1::cre; Pet1::Flpe; RC::FrePe* (Green  
2003 labeled neurons with intersectional expression of *En1::cre* and *Pet1::Flpe*).  
2004 Anatomical subdivisions (Dorsomedial (dmDR), Medial (mDR), Ventromedial  
2005 (vmDR)) are depicted in the coronal photomicrographs from D-I, from rostral (left)  
2006 to caudal (right). n=2, bar graph depicting the mean with SEM. (B) TPH2

2007 immunostaining in an *En1::cre; Pet1::Flpe; RC::FrePe* coronal section. Open  
2008 arrow indicates an example of a TPH2+ *En1::cre; Pet1::Flpe* cell and the closed  
2009 arrow indicates a TPH2- *En1::cre; Pet1::Flpe* cell. (C) VGLUT3 immunostaining  
2010 in a *Vglut3::IRES-cre; Pet1::Flpe; RC::FL-hM3Dq* coronal section (green  
2011 indicating neurons labeled by the intersection of *Vglut3::IRES-cre* and *Pet1::Flpe*,  
2012 red indicating the subtractive *Pet1* population). Open arrow shows an example of  
2013 a VGLUT3 immunopositive *Vglut3::cre; Pet1::Flpe* cell, closed arrow shows a  
2014 VGLUT3 immunonegative subtractive *Pet1* cell. Scale bar in B and C equals 25  
2015  $\mu\text{m}$ . (D-I) Quantification of the percentage of VGLUT3 immunoreactive  
2016 *Vglut3::cre; Pet1::Flpe* lineage (dark green) and VGLUT3 immunoreactive  
2017 subtractive *Pet1* lineage cells (dark red) within anatomical subdivisions of the  
2018 dorsal raphe from rostral (D) to caudal (I), in comparison to VGLUT3  
2019 immunonegative *Vglut3::cre; Pet1::Flpe* and subtractive *Pet1* neurons (light green  
2020 and light red respectively). Low magnification images indicate representative  
2021 quantified images. Anatomical subdivisions (dorsomedial (dm), medial (m),  
2022 ventromedial (vm) and dorsolateral (dl)) are delineated with white brackets. Scale  
2023 bar in D equals 100  $\mu\text{m}$ , n=2, bar graph depicts mean with SEM. (J) Summary  
2024 coronal brainstem schematic showing the distribution of VGLUT3 immuno-  
2025 positive and immuno-negative *Vglut3::cre; Pet1::Flpe* (dark and light green) and  
2026 subtractive *Pet1* neurons (dark and light red) in the DR from rostral (left) to  
2027 caudal (right).

2028 Figure 4: scRNA-seq of *Pet1* neurons sorted from anatomical subdomains map  
2029 onto specific 10x scRNA-seq clusters. (A) Schematic of the pipeline used for  
2030 manual sorting and sequencing, including referenced anatomical subdomains  
2031 mapped onto representative images of the DR. *Pet1* neurons are in green. (B)  
2032 Dot plot mapping manually sorted cells from a given genotype and anatomical  
2033 subdomain (Y-axis) to the fourteen 10x clusters (X-axis). The size of the dot  
2034 indicates the percentage of single cells from a genotype/anatomical region  
2035 attributed to a reference cluster. Note, the asterisks after *Drd2::cre; Pet1::Flpe* is  
2036 to denote that these data come from a previously published study (Niederkofler,

2037 et al. 2016), and these particular single-cell libraries were prepared using the  
2038 Nugen Ovation RNA-seq System v2 kit, rather than SMART-Seq v4. The  
2039 expression of a selection of highly variable and cluster marker genes is depicted  
2040 in Figure 4- figure supplement 1.

2041 Figure 4 – figure supplement 1: Expression patterns of a selection of highly  
2042 variable and cluster marker genes that show anatomical bias. Dot plot depicting  
2043 the expression of genes (Y-axis) across manually sorted cells from a specific  
2044 subdomain and genotype (left) and 10x scRNA-seq clusters (right). The size of  
2045 the dot represents the percentage of cells expressing the gene and saturation of  
2046 color represents the average normalized expression level. As with Figure 4, the  
2047 asterisks after *Drd2::cre;Pet1::Flpe* denotes that these data come from a  
2048 previously published study (Niederkofler, et al. 2016), and these particular single-  
2049 cell libraries were prepared using the Nugen Ovation RNA-seq System v2 kit,  
2050 rather than SMART-Seq v4.

2051 Figure 4 - figure supplement 2: PAX5 and SATB2 are expressed predominately  
2052 in rostral dorsomedial and dorsolateral *Pet1* neurons while NR2F2 is expressed  
2053 predominately in caudal *Pet1* neurons. (A) Representative regions of the DR  
2054 used for quantification of immunostaining from rostral (left) to caudal (right).  
2055 Brackets indicate anatomical subdivisions- dorsomedial (dmDR, dark blue),  
2056 medial (mDR, tan), ventromedial (vmDR, gray), and dorsolateral (dlDR, light  
2057 blue). (B-D) (top) Distribution of normalized transcript expression of *Pax5* (B),  
2058 *Satb2* (C) or *Nr2f2* (D) within *Pet1* neuron subtypes and (bottom) the percentage  
2059 of counted *Pet1* neurons immunoreactive for PAX5 (B), SATB2 (C) or NR2F2 (D)  
2060 that are arising from *Vglut3::cre; Pet1::Flpe* neurons (dark grey) in comparison to  
2061 the subtractive *Pet1* population (light grey). (B'-D') Bar graph depicting the  
2062 percentage of *Pet1* neurons immunopositive for PAX5 (B'), SATB2 (C') or NR2F2  
2063 (D') in anatomical subdivisions of the DR from rostral to caudal. n=2- 4  
2064 depending on rostral to caudal section, bar graph depicting mean with SEM. (B''-  
2065 D'') Representative coronal confocal image depicting a region of the DR with  
2066 *Pet1* neurons immunopositive for PAX5 (B''), SATB2 (C'') or NR2F2 (D'').

2067 *Vglut3::cre;Pet1::Flpe* cells are shown in green, subtractive *Pet1* cells in red, and  
2068 antibody of interest in blue. (E) Coronal brainstem schematics depicting the  
2069 anatomical distribution of *Pet1* neurons (top) expressing PAX5 and NR2F2, or  
2070 (bottom) that are expressing *Gad2-Tph2*, *Vglut3-Tph2*, or *Vglut3* only from rostral  
2071 (right) to caudal (left).

2072 Figure 5: *P2ry1::cre; Pet1::Flpe* neurons project throughout the ventricles and are  
2073 in close apposition to proliferating cells in the SVZ and RMS. (A) Flat mount of  
2074 the lateral wall of the lateral ventricle of a *P2ry1::cre;Pet1::Flpe;Ai65* animal,  
2075 where *P2ry1::cre;Pet1::Flpe* fibers are in grey. Scale bar = 100  $\mu$ m. (B-E) High  
2076 magnification confocal images from regions of the lateral wall represented in red  
2077 boxes in A. Scale bar (B) = 100  $\mu$ m. (F) 3D brain schematic showing the  
2078 *P2ry1::cre;Pet1::Flpe* cell bodies (dark orange) in the caudal part of the DR (light  
2079 orange) and fibers (dark orange) projecting through the ventricles (grey) and  
2080 along the migrating neuroblasts of the rostral migratory stream (RMS, blue). (G-  
2081 H) Coronal confocal images depicting *P2ry1::cre;Pet1::Flpe* fibers (orange) from  
2082 *P2ry1::cre;Pet1::Flpe;Ai65* animals in the SVZ (G) and RMS (H). Proliferating  
2083 cells labeled with Ki67 (grey) and migrating neuroblasts labeled with doublecortin  
2084 (DCX, blue). Scale bar (G, H) = 50  $\mu$ m

2085 Figure 6: *P2ry1::cre;Pet1::Flpe* neurons have a distinct firing phenotype. (A)  
2086 Example voltage traces from a neuron type that started firing action potentials  
2087 with short latency (mean= 17.32 ms  $\pm$  6.61 at 200 pA), in response to 750 ms  
2088 current pulses. (B) Example traces from a neuron type that started firing action  
2089 potentials with medium latency (mean= 64.18 ms  $\pm$  9.8 at 200 pA). (C) Example  
2090 traces from a neuron that started firing action potentials with long latency (mean=  
2091 476.55 ms  $\pm$  223.64 at 200 pA). (D) Example traces from a neuron that fired  
2092 action potentials with short latency (mean= 12.6 ms  $\pm$  5.9 at 200 pA) and that  
2093 displayed frequency adaptation. (E) Frequency-Current curves show *P2ry1::cre;*  
2094 *Pet1::Flpe* neurons (tdTomato<sup>+</sup> *P2ry1::IRES-cre;Pet1::Flpe;Ai65*, n=9; 3 animals;  
2095 red circles) are less excitable than nearby caudodorsal raphe non-  
2096 *P2ry1::cre;Pet1::Flpe* populations (eGFP<sup>+</sup> *P2ry1::IRES-cre;Pet1::Flpe;RC::FL-*

2097 *hM3Dq*, n=8; 3 animals; black squares) or neurons from the dorsomedial and  
2098 dorsolateral Raphe *Gad2::cre;Pet1::Flpe* population (tdTomato<sup>+</sup> *Gad2::IRES-*  
2099 *cre;Pet1::Flpe;Ai65*, n=12; 2 animals; blue diamonds) p<0.0001 Kruskal-Wallis  
2100 test. (F) Heat map shows the distribution of firing types of recorded cells  
2101 according to genotype, note that while firing type B is the most frequent overall,  
2102 all recorded *P2ry1::cre; Pet1::Flpe* neurons belong to type D.

2103 Figure 6- figure supplement 1: Key membrane properties distinguish serotonergic  
2104 neuron firing types. Groups are same as in Figure 6; all *P2ry1::IRES-cre;*  
2105 *Pet1::Flpe;RC::Ai65* neurons belong to group D. (A) Scatterplot of rheobase (in  
2106 pA) exhibited by each cell of the corresponding firing type. (B) Scatterplot of the  
2107 latency of each cell to fire the first action potential after the onset of the  
2108 depolarizing current pulse by the corresponding firing type. (C) Same as B  
2109 except firing type D was split into subgroups Da and Db, based on bi-modality  
2110 visible in B. (D) Scatterplot of the maximum firing frequency (in Hz) exhibited by  
2111 each cell of the corresponding firing type. (E) Scatterplot of the membrane  
2112 resistance (in MΩ), exhibited by each cell of the corresponding firing type. (F)  
2113 Scatterplot of the average half-width of the action potential of each firing type at  
2114 maximum firing rate (in ms). Dashed lines indicate the median. Asterisks indicate  
2115 statistical significance, Kruskal-Wallis test \*p < 0.05, \*\*p < 0.01, \*\*\*p < 0.001,  
2116 \*\*\*\*p < 0.0001.

2117 Figure 7: Correspondence of serotonin subtypes identified in previous studies (Y-  
2118 axis) to the fourteen 10x clusters identified in this study (X-axis). The size of the  
2119 dot indicates the percentage of single cells from the original cluster that are  
2120 attributed to a given reference cluster.

2121 Figure 8: Fourteen *Pet1* subtypes in the DR can be defined by the combinatorial  
2122 expression of transcription factors and other markers and have distinct  
2123 anatomical organization. (A) Molecular markers (neurotransmitters (NTs),  
2124 transcription factors (TFs), and other markers) on the left half of the table, with  
2125 increasing specificity from left to right, that combinatorically define each identified

2126 *Pet1* subtype (colored column). Anatomical biases of each cluster are described  
2127 on the right, with increasing specificity from right to left. Note, cluster numbers  
2128 have been re-ordered to highlight anatomical groupings.

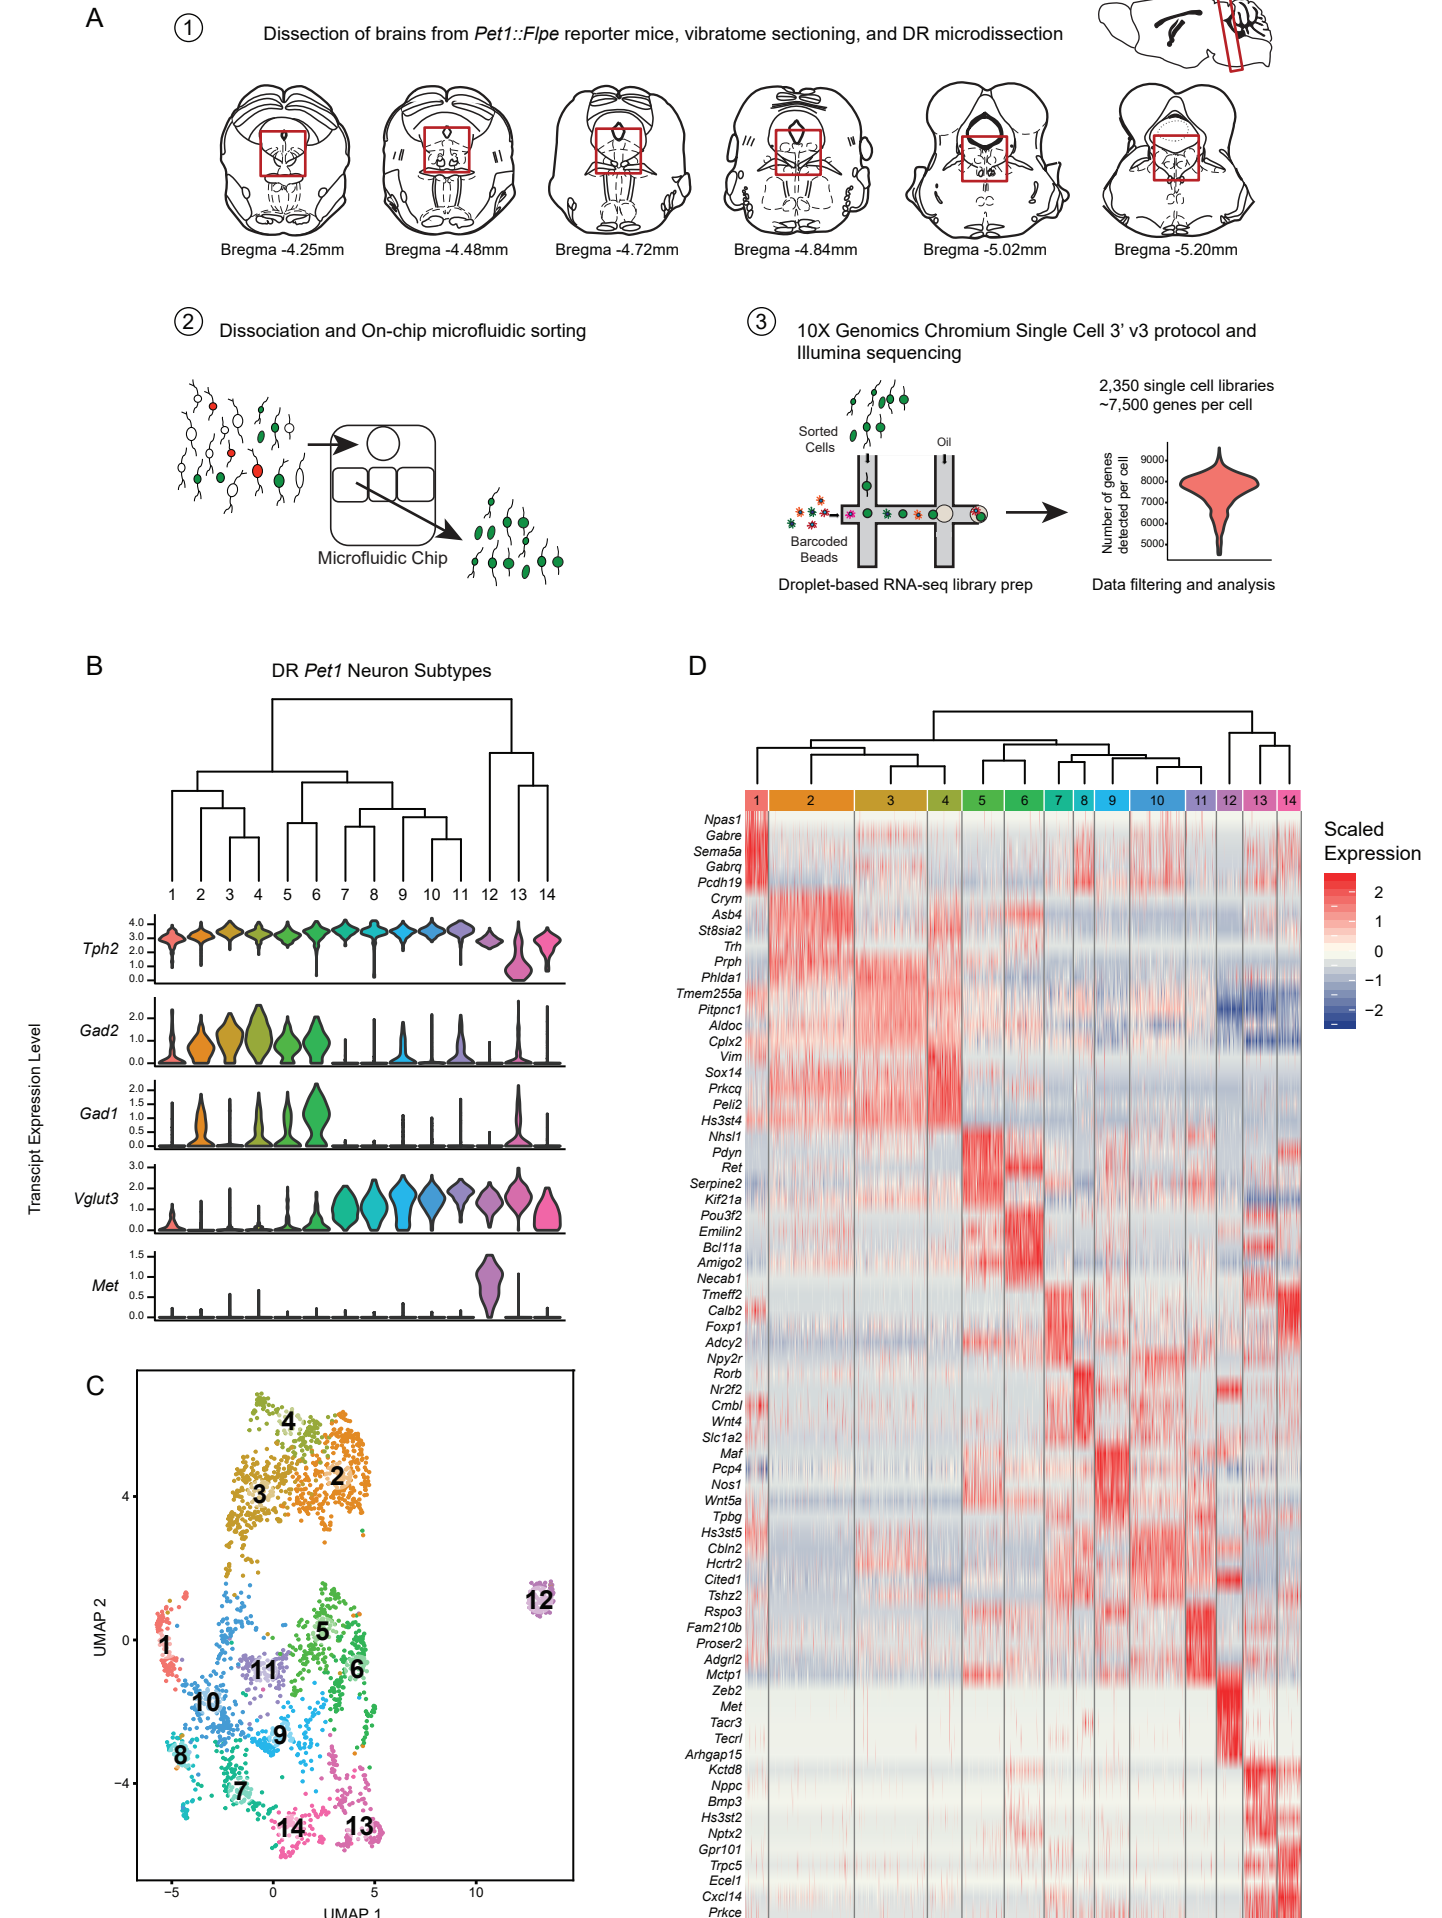

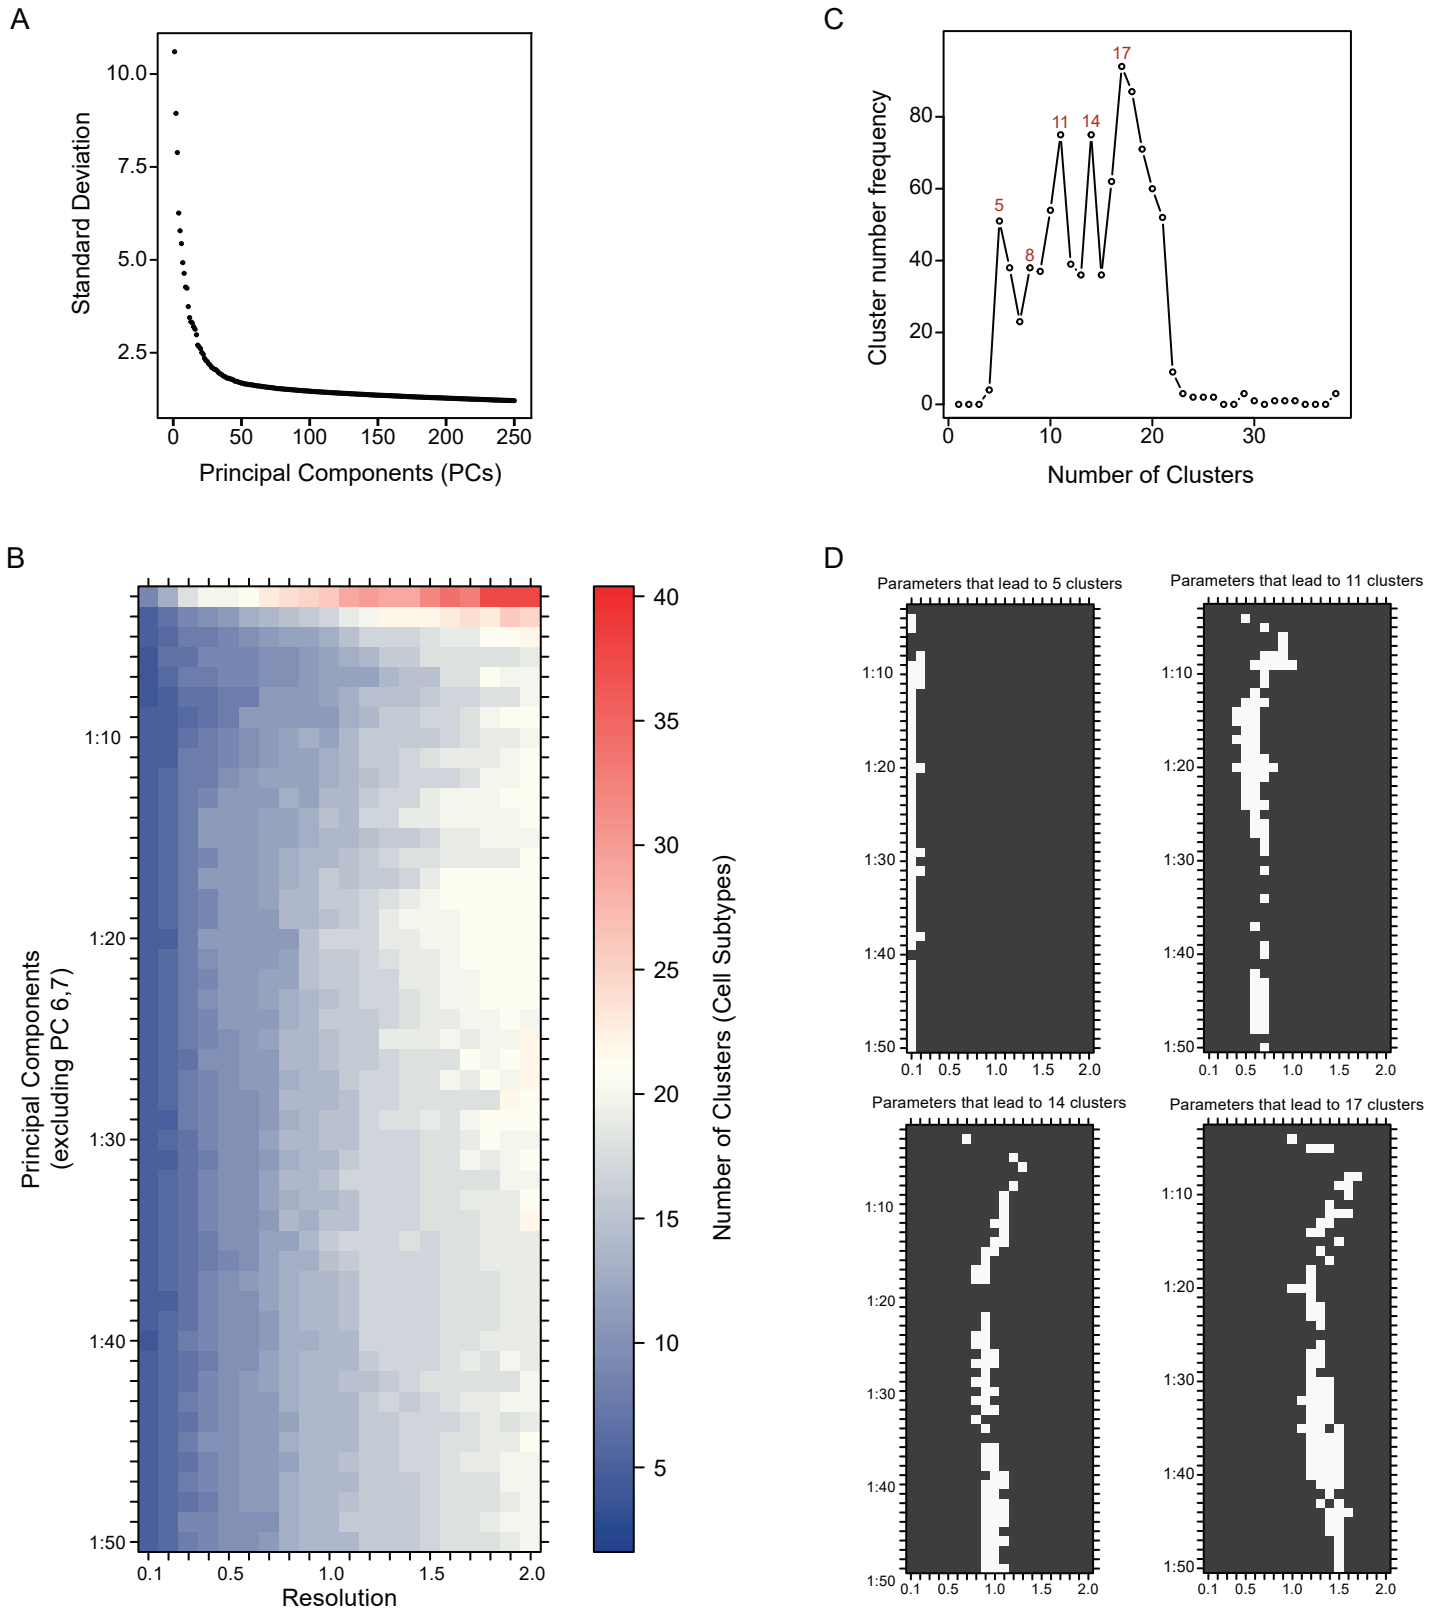



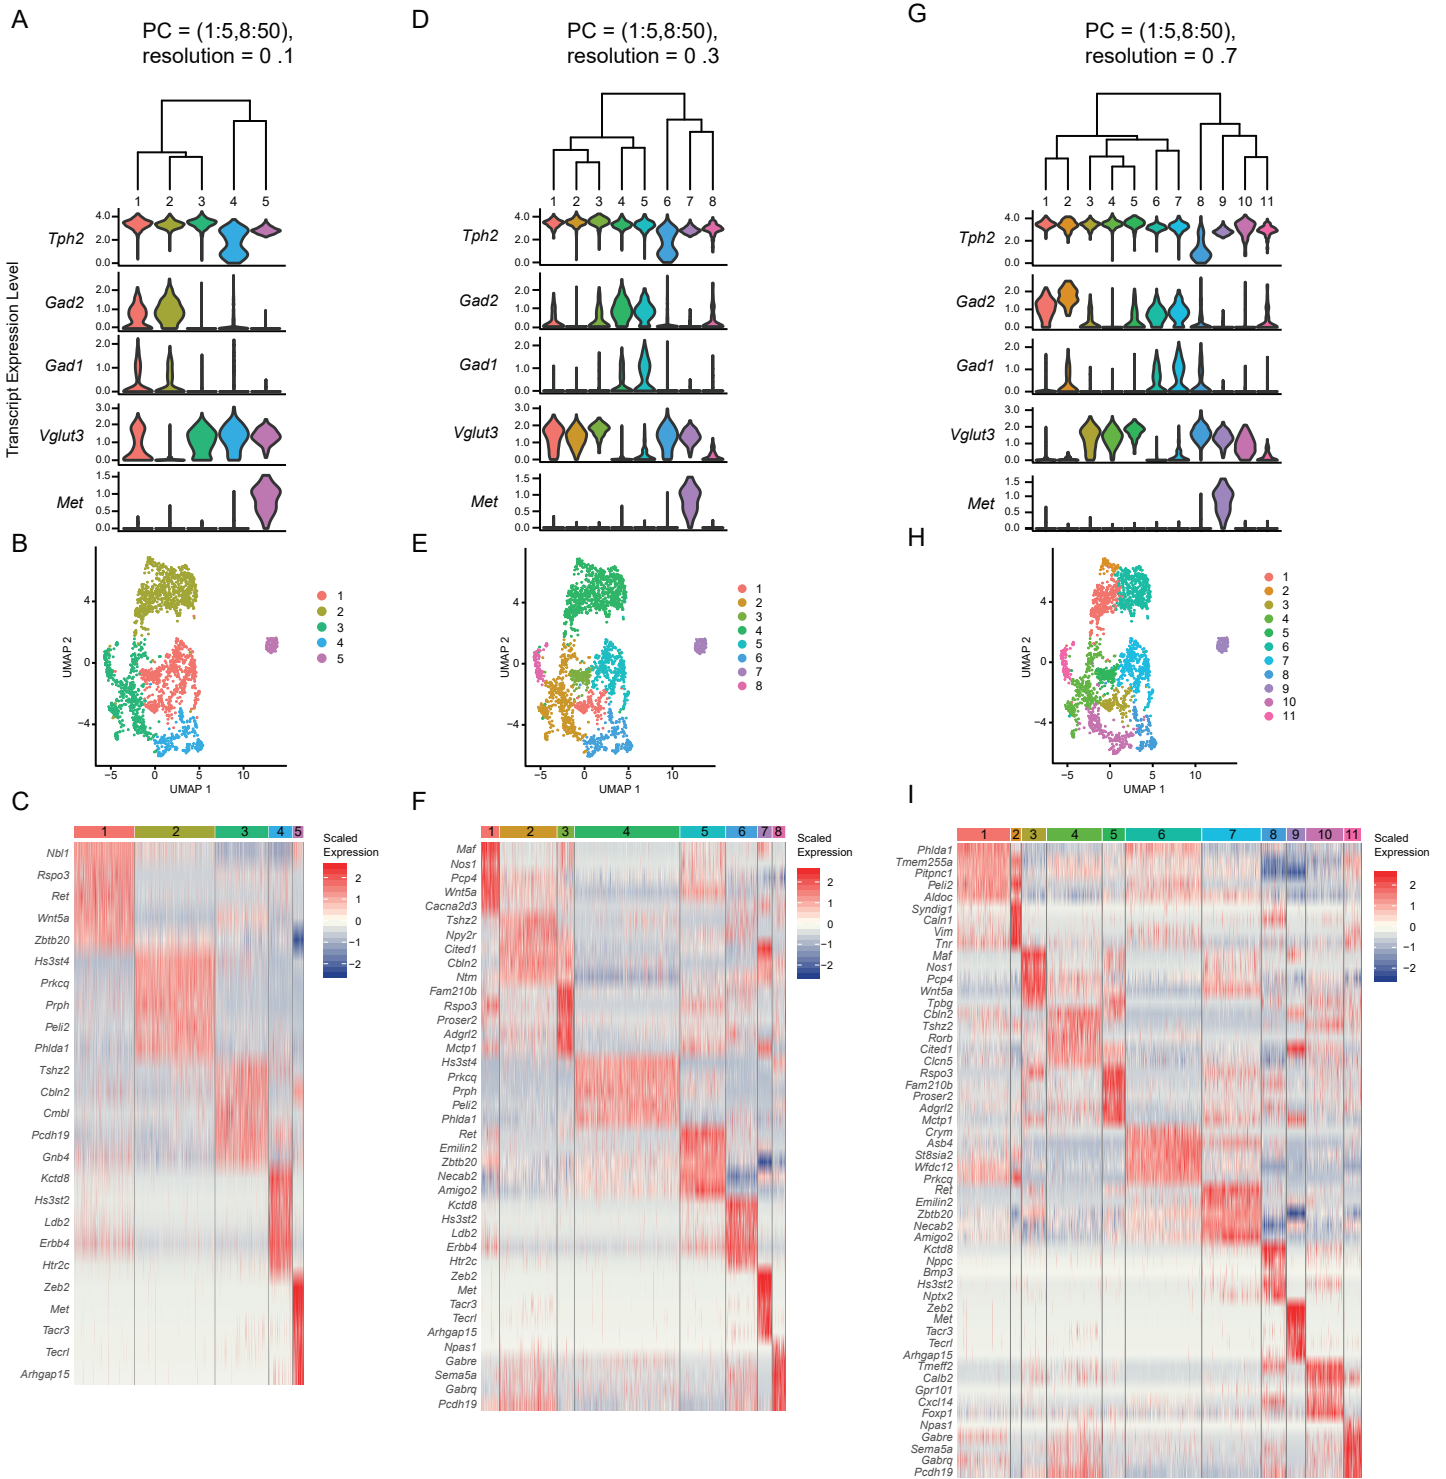

Figure 1- figure supplement 3

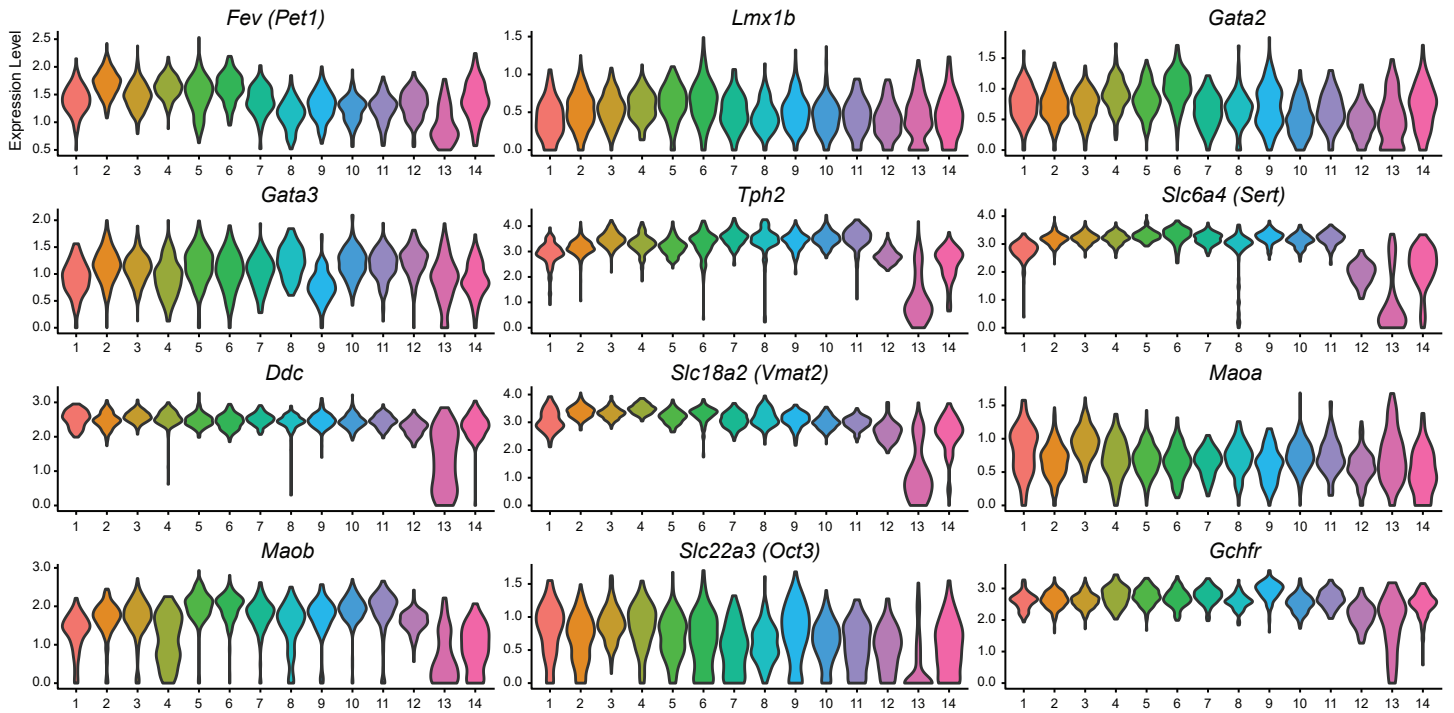

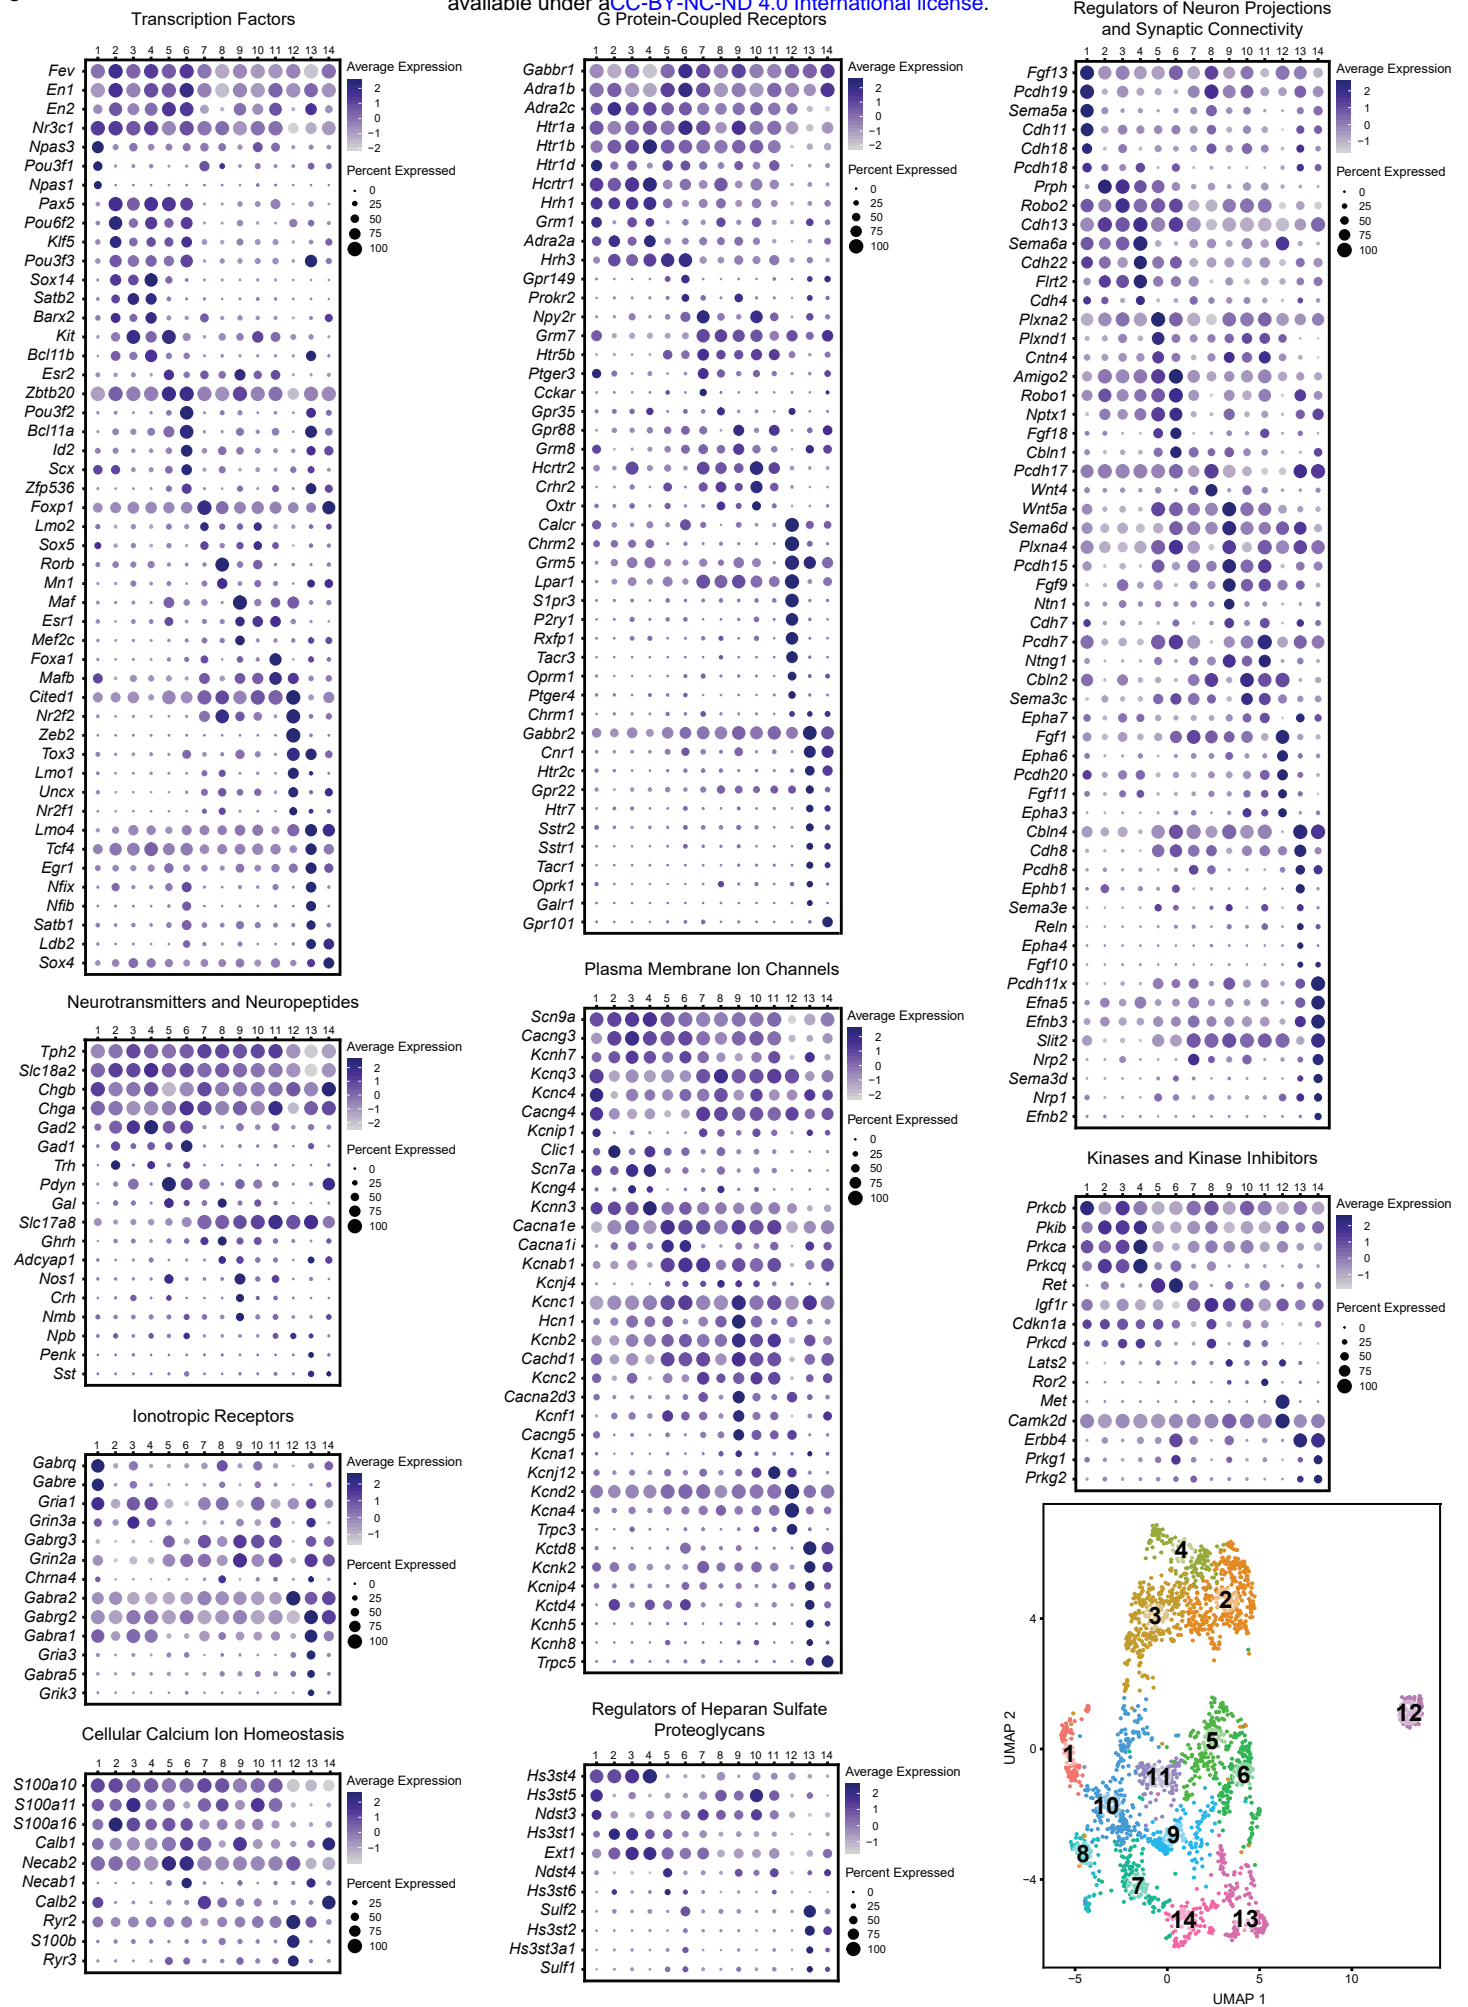

Figure 3

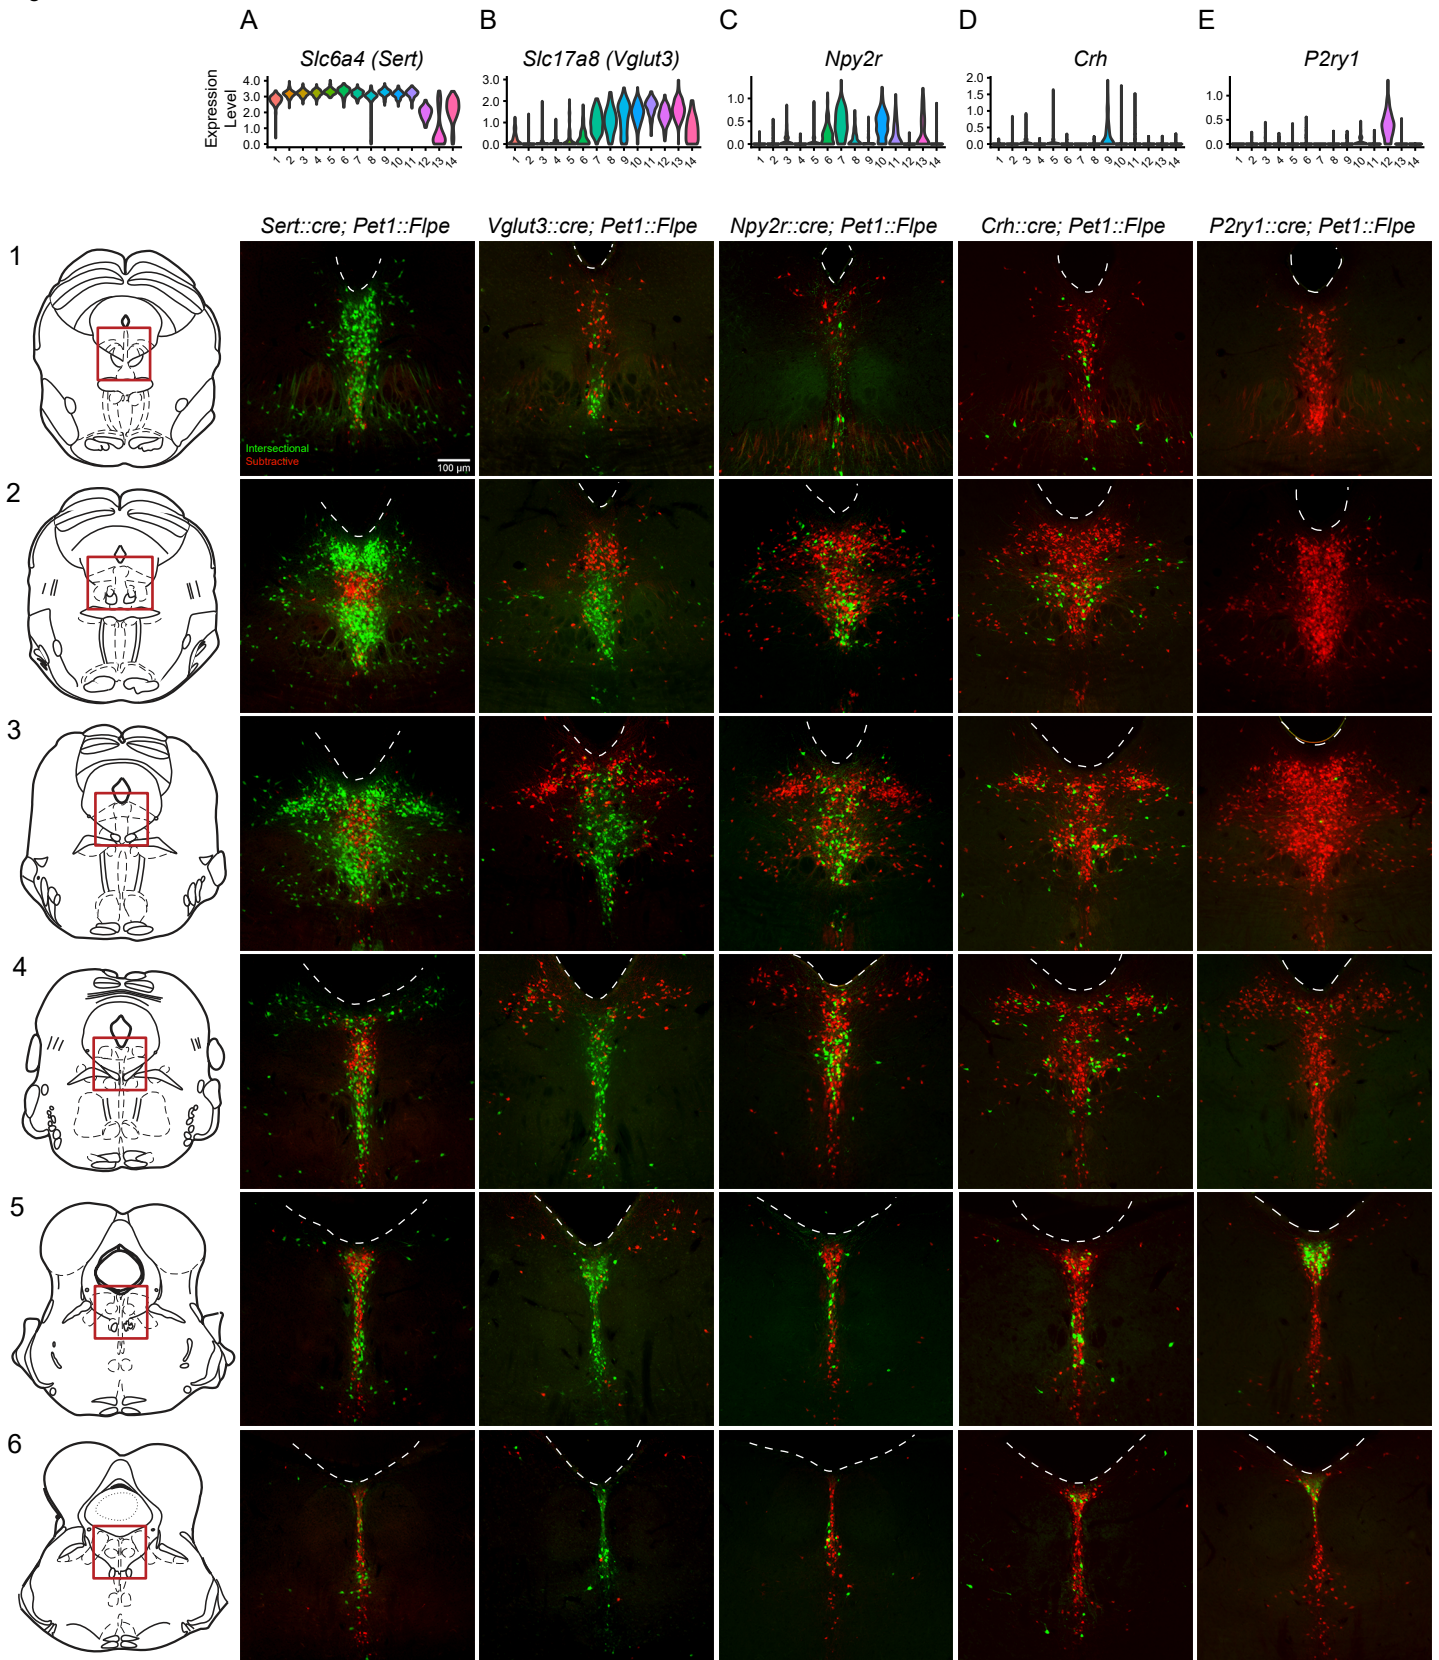

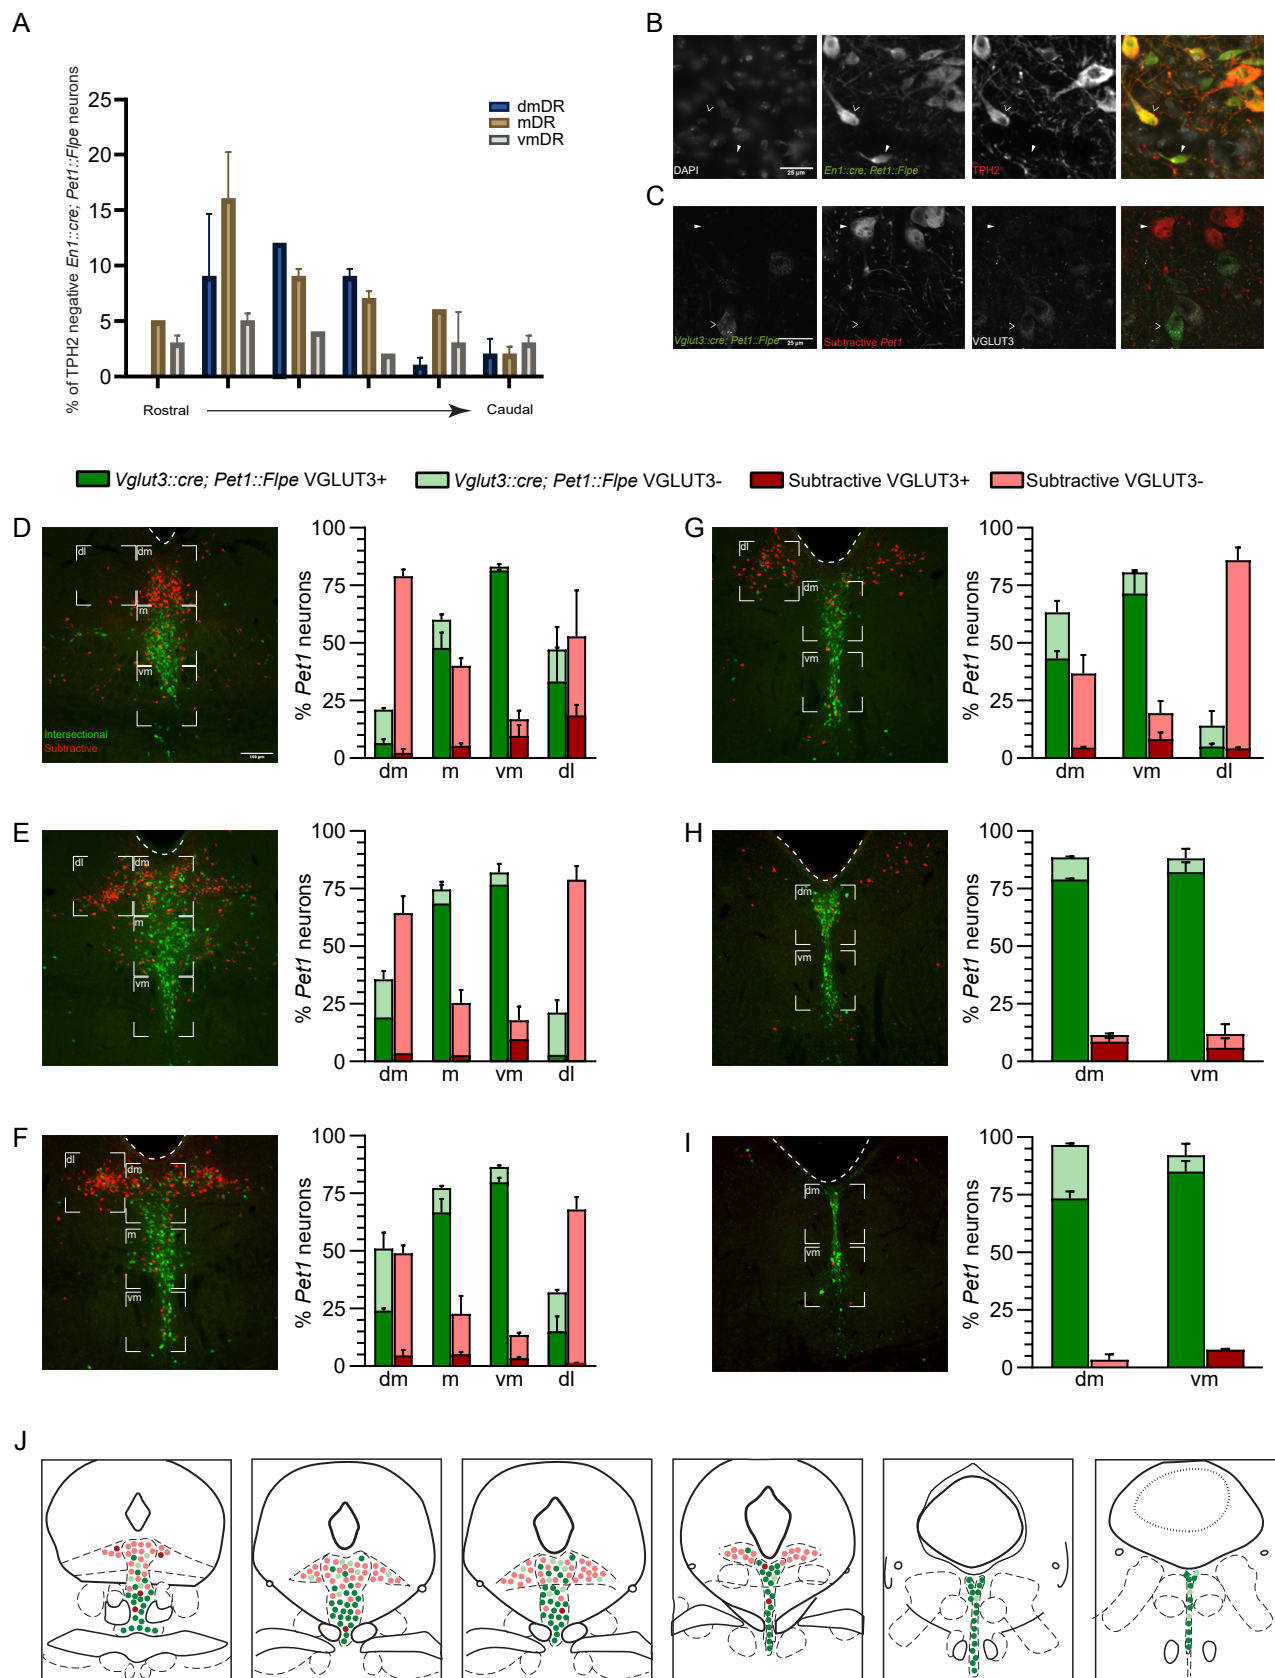

Figure 4

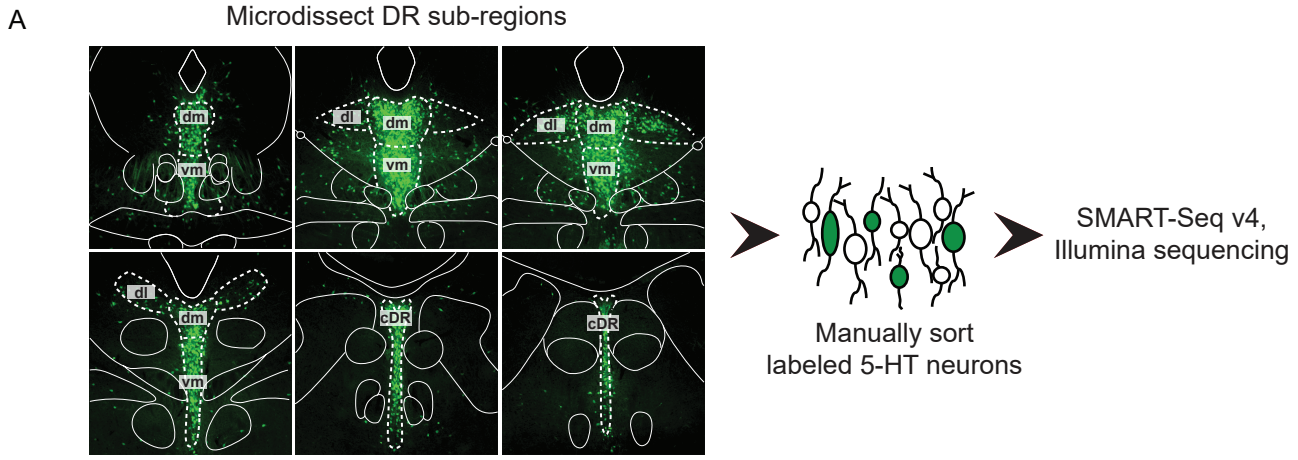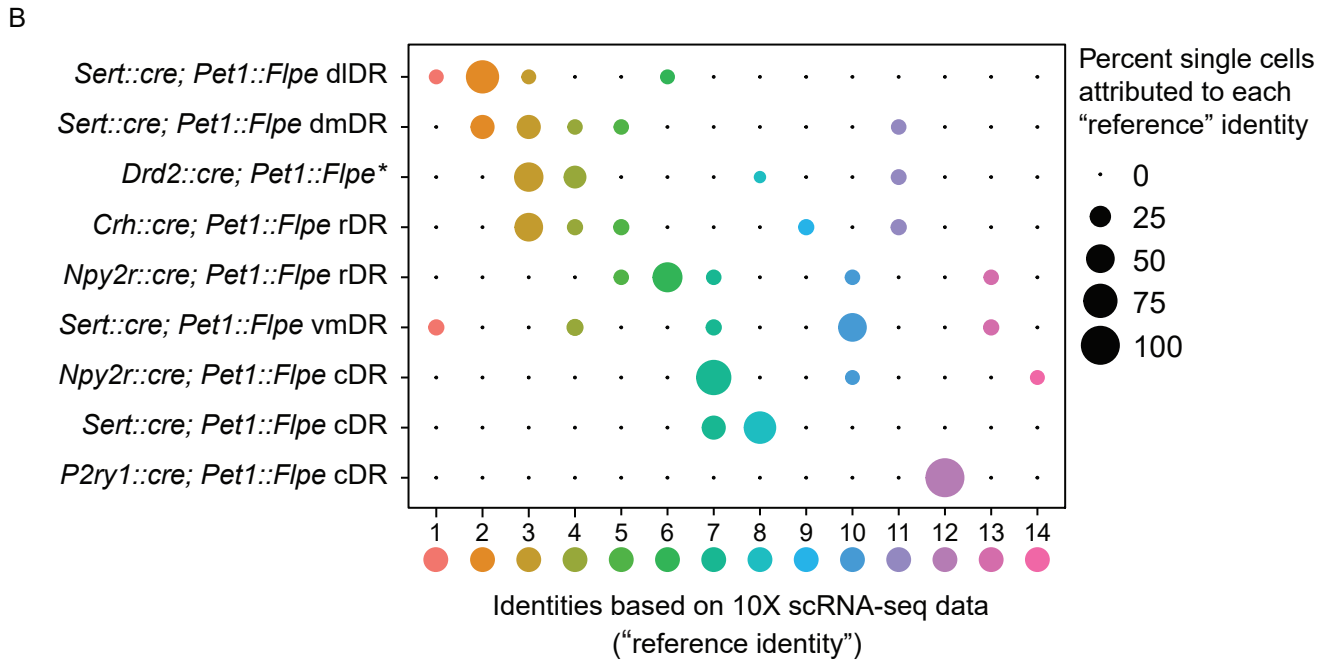

Figure 4 - figure supplement 1

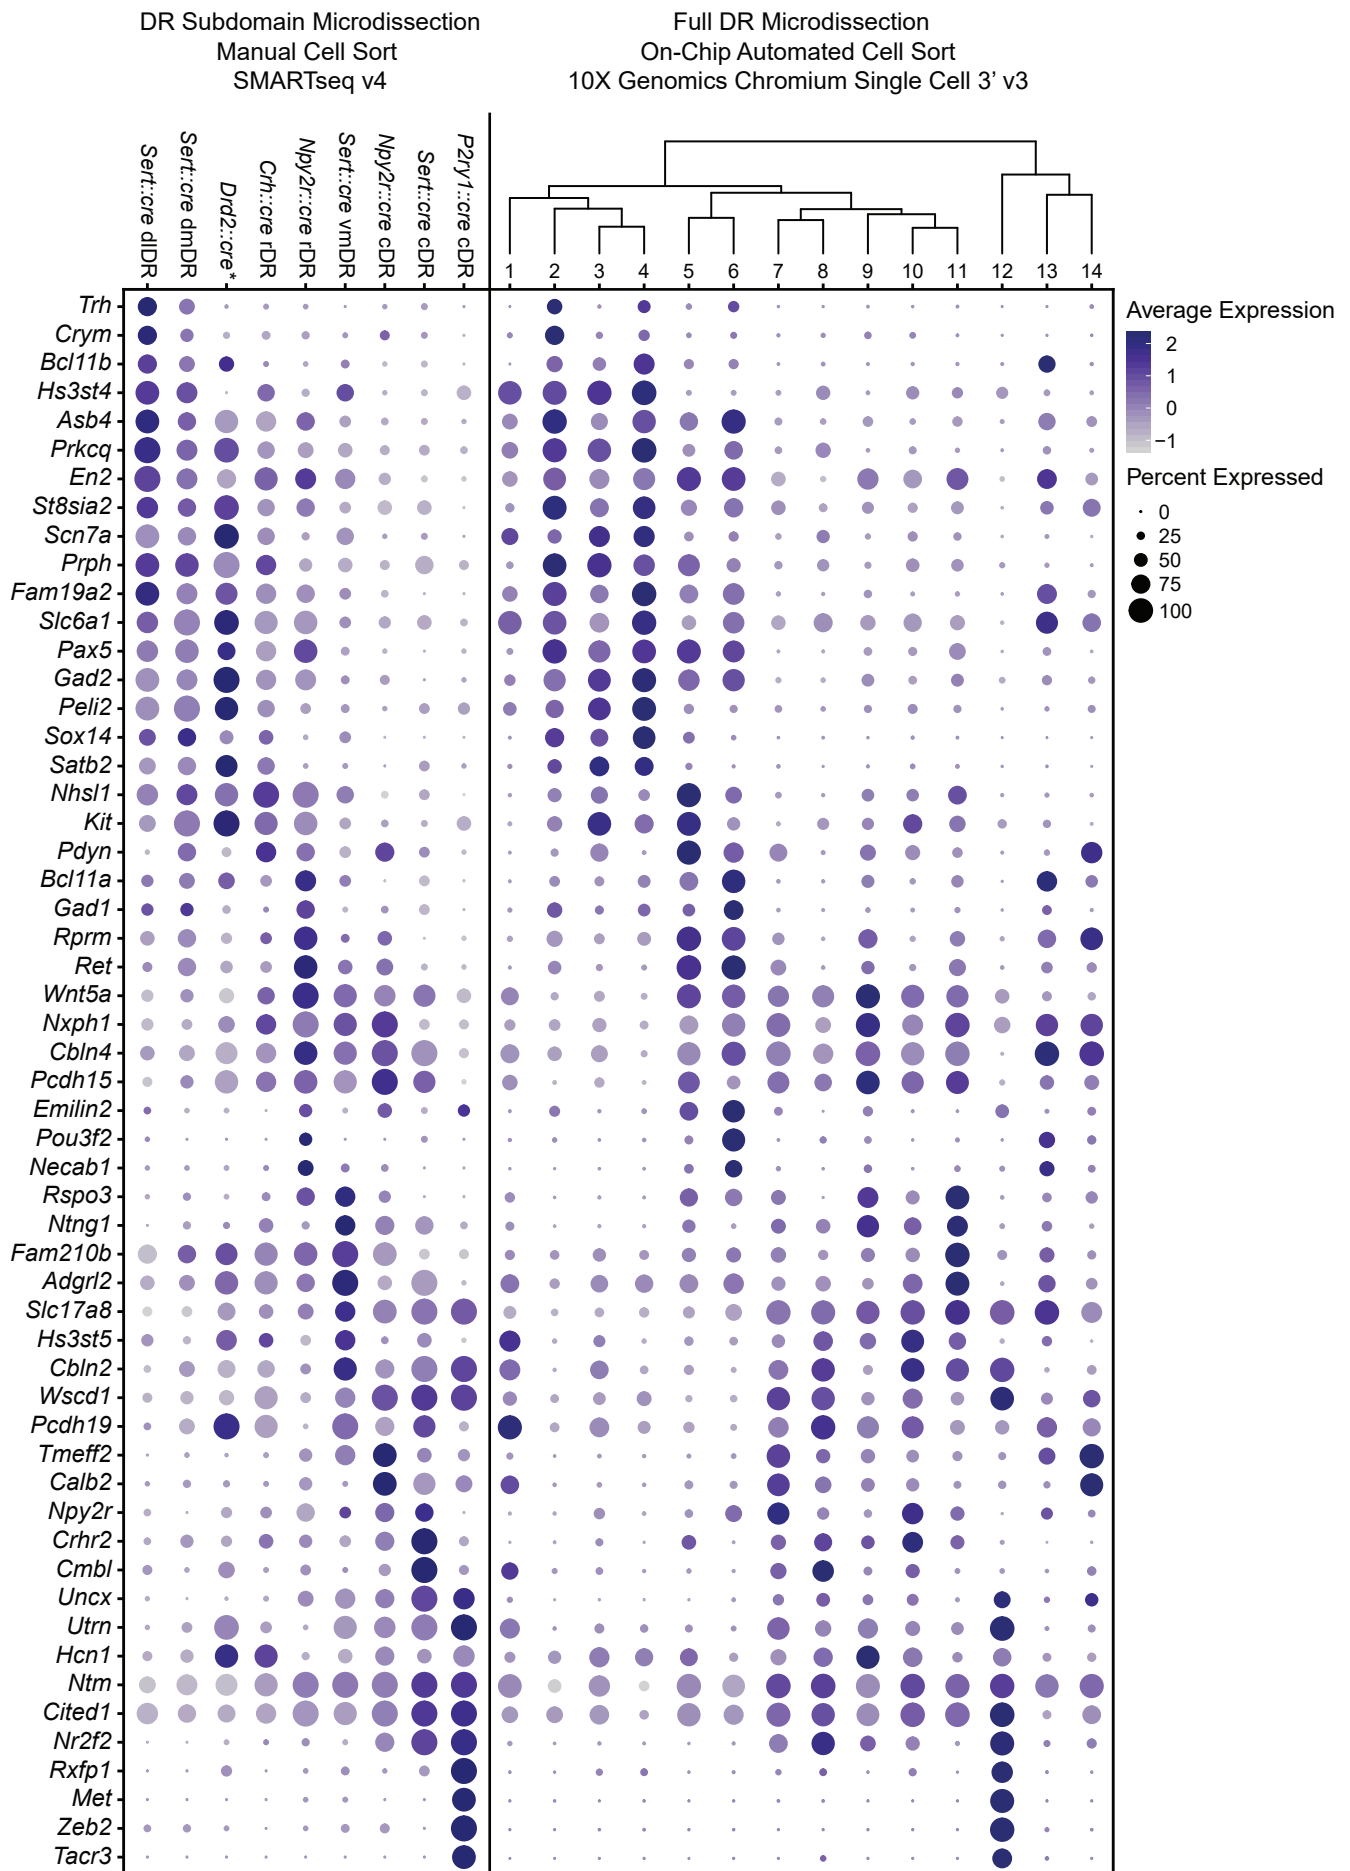

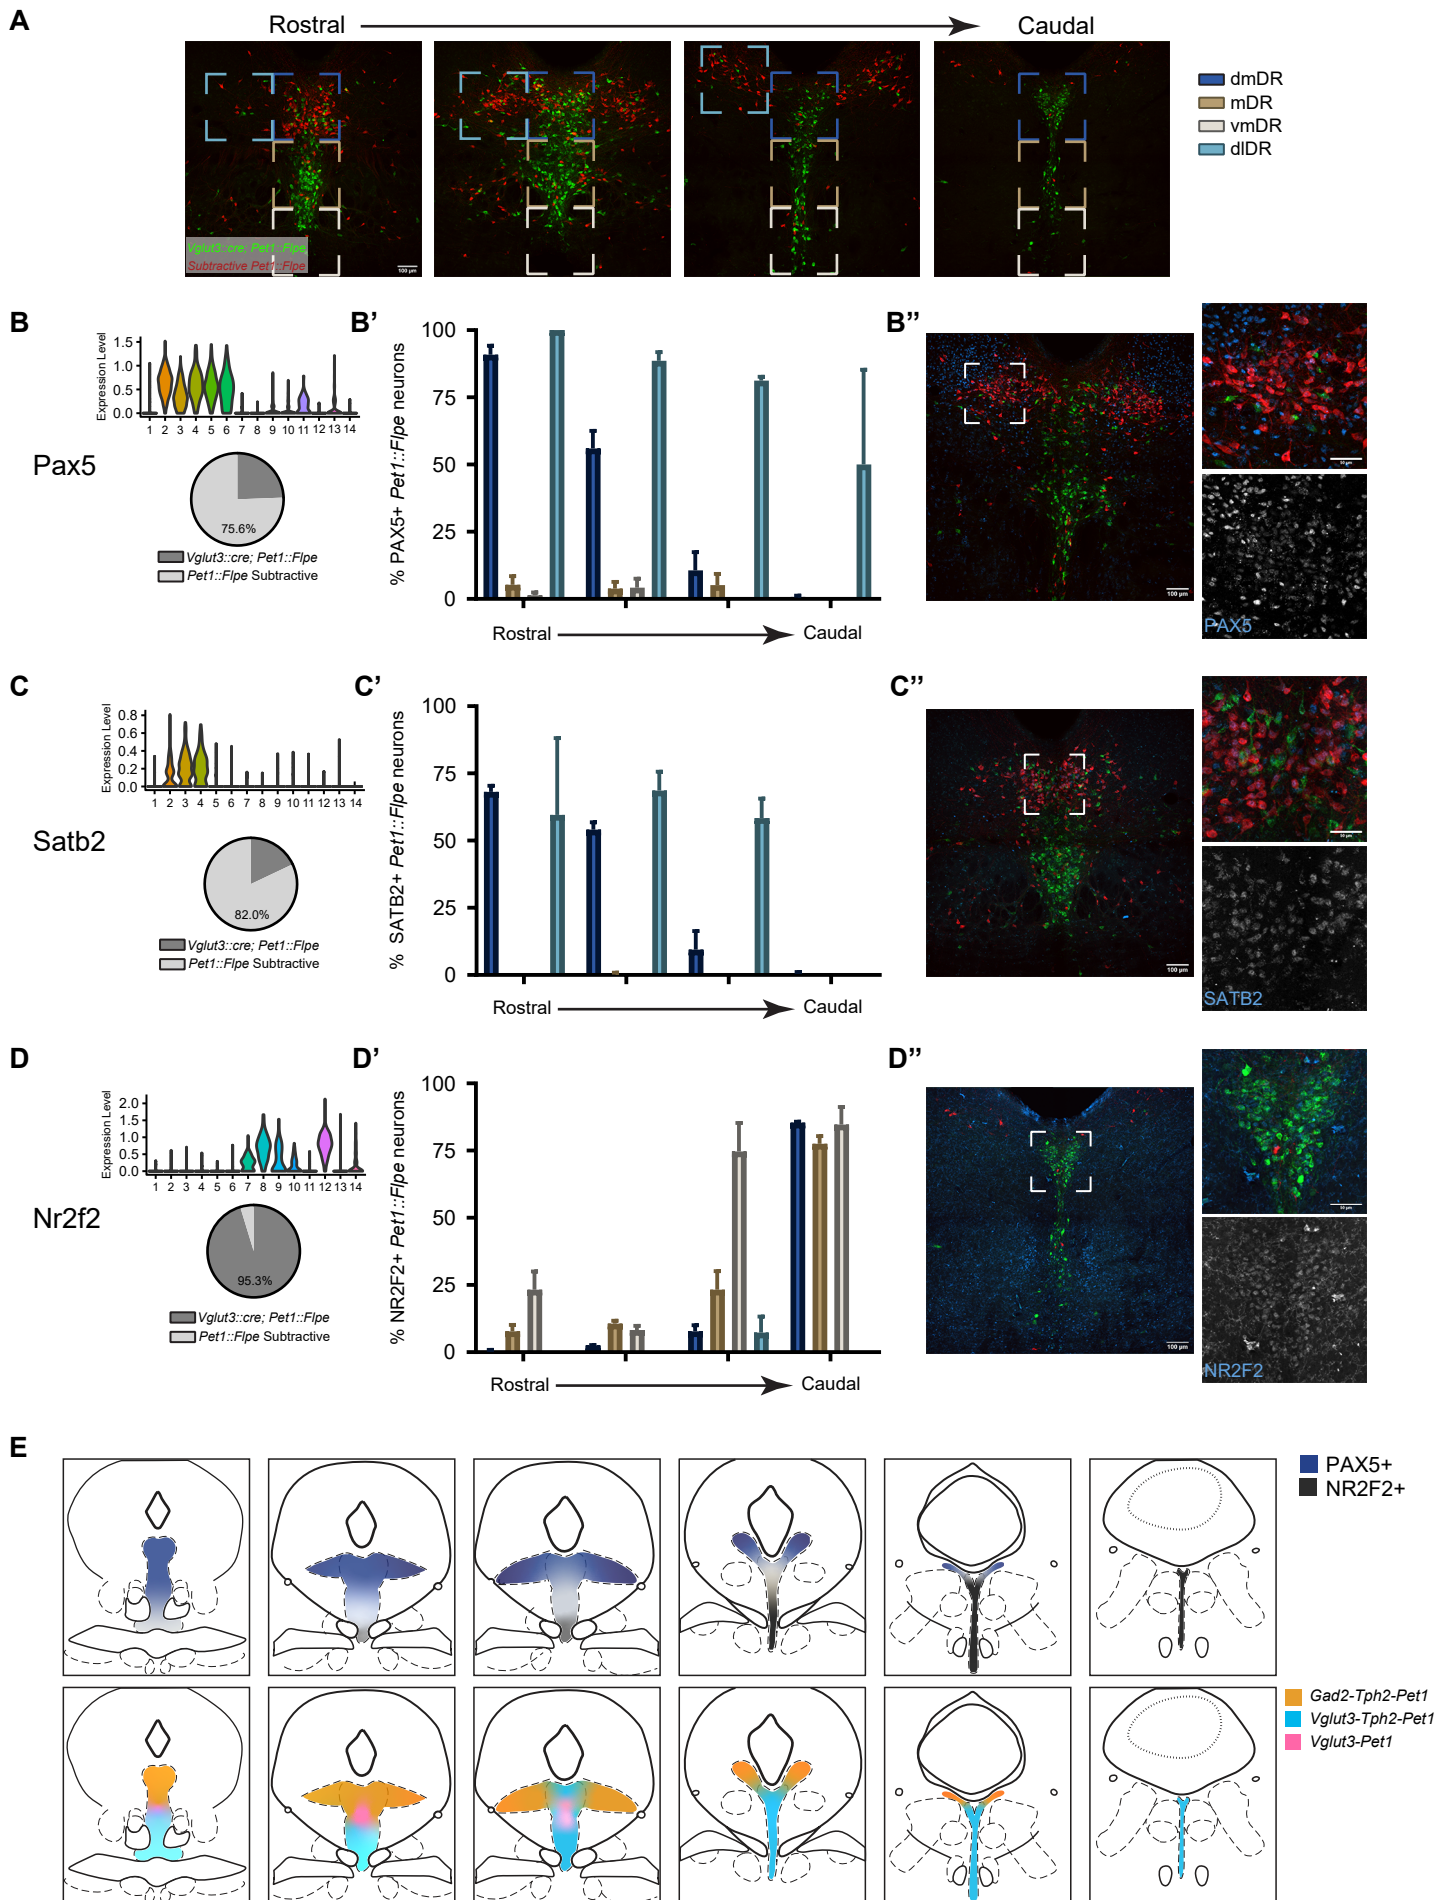



Figure 5

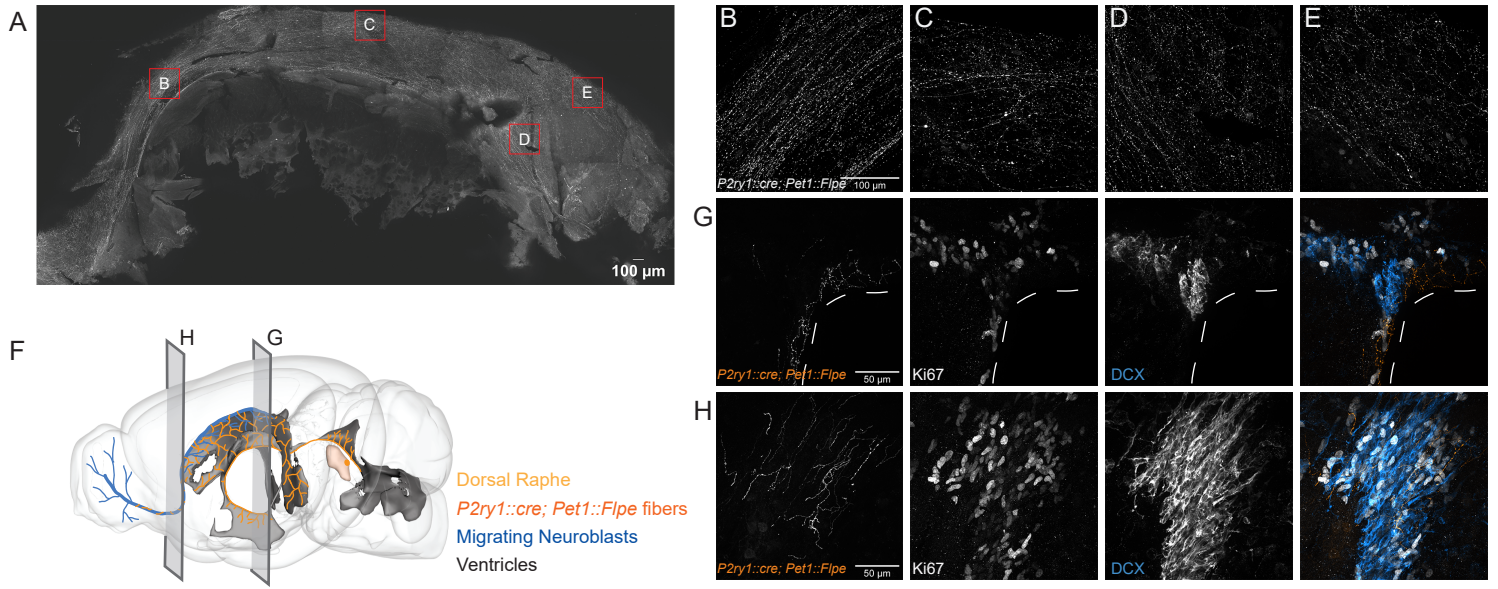

Figure 6

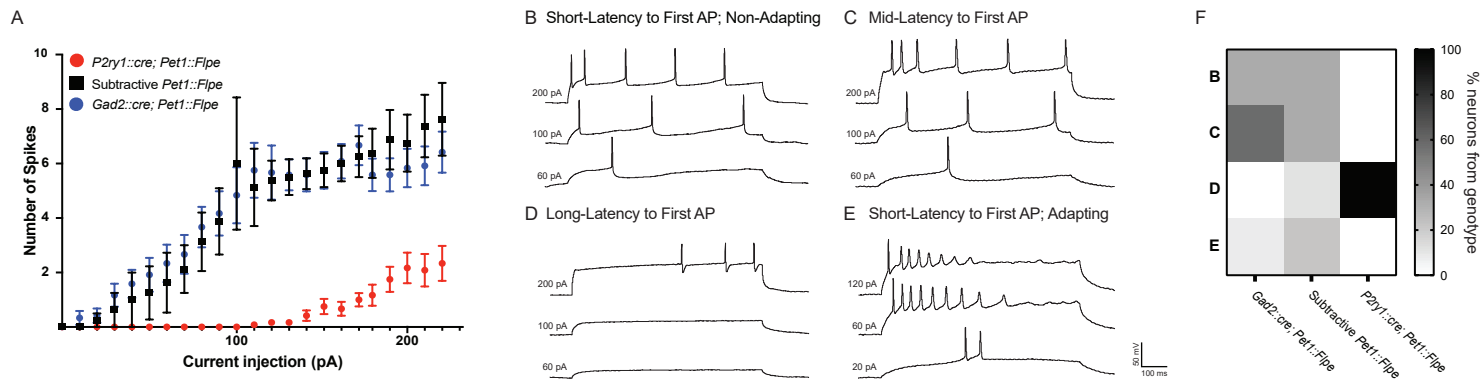

Figure 6- figure supplement 1

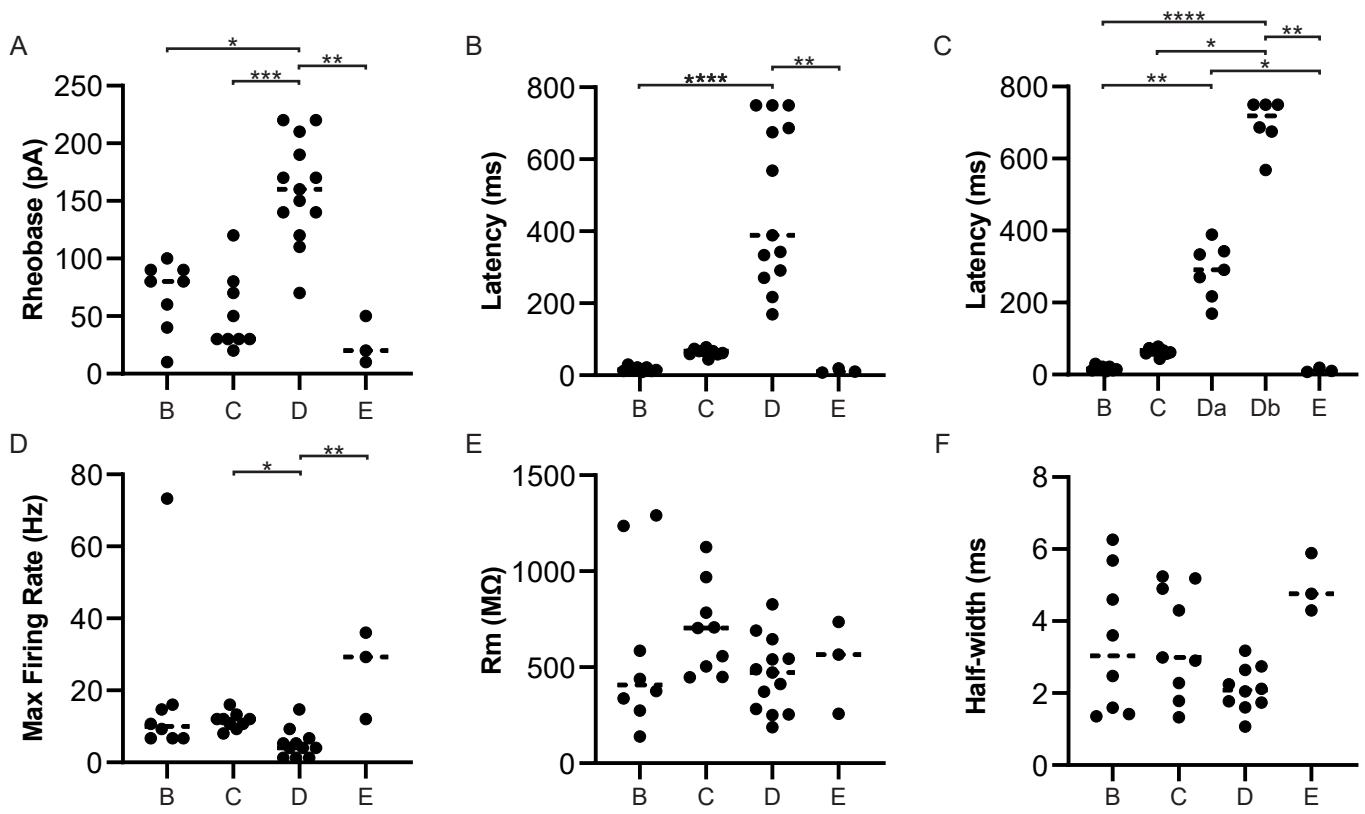



Figure 8

|             |                                    | Molecular Organization |                              |                              | Anatomical Organization |                    |         |         |
|-------------|------------------------------------|------------------------|------------------------------|------------------------------|-------------------------|--------------------|---------|---------|
|             |                                    | NTs                    | TFs                          | Other Markers                |                         |                    |         |         |
| <i>Pet1</i> | <i>Tph2</i>                        | <i>Gad2</i>            | <i>Npas1</i><br><i>Npas3</i> | <i>Gabre</i><br><i>Gabrq</i> | 1                       | Dorsal             | Rostral |         |
|             |                                    |                        | <i>Pax5</i>                  | <i>Crym</i><br><i>Trh</i>    | 2                       |                    |         |         |
|             |                                    |                        |                              | <i>Sox14</i><br><i>Satb2</i> | <i>Phlda1</i>           |                    |         | 3       |
|             |                                    |                        |                              | <i>Vim</i>                   | 4                       |                    |         |         |
|             |                                    |                        |                              | <i>Pdyn</i><br><i>Nhsl1</i>  | 5                       |                    |         |         |
|             |                                    | <i>Pou3f2</i>          | <i>Emilin2</i>               | 6                            |                         |                    |         |         |
|             |                                    | <i>Foxa1</i>           | <i>Rspo3</i>                 | 11                           |                         |                    |         |         |
|             |                                    | <i>Vglut3</i>          | <i>Nr2f2</i>                 | <i>Maf</i><br><i>Nos1</i>    | 9                       |                    |         | Ventral |
|             |                                    |                        |                              | <i>Cbln2</i>                 | 10                      |                    |         |         |
|             |                                    |                        |                              | <i>Tmeff2</i>                | 7                       |                    |         |         |
|             | <i>Rorb</i>                        |                        |                              | <i>Wnt4</i>                  | 8                       |                    |         |         |
|             | <i>Tph2</i><br><i>low/variable</i> | <i>Ldb2</i>            | <i>Zeb2</i>                  | <i>Met</i><br><i>P2ry1</i>   | 12                      | Dorsal             | Caudal  |         |
|             |                                    |                        | <i>Nfix</i><br><i>Nfib</i>   | <i>Kctd8</i><br><i>Nptx2</i> | 13                      | Rostro-medial bias |         |         |
|             |                                    |                        | <i>Gpr101</i>                | 14                           |                         |                    |         |         |
|             |                                    |                        |                              |                              | Distributed             |                    |         |         |
